# Supplementary material for: 3-Hydroxy-3-((3-methyl-4-nitroisoxazol-5-yl)methyl)indolin-2-one as a versatile intermediate for retro-Henry and Friedel–Crafts alkylation reactions in aqueous medium
Source: Royal Society of Chemistry journal article supplement (doi:10.1039/c9nj03209f), 2019-01-01

**3-hydroxy-3-((3-methyl-4-nitroisoxazol-5-yl)methyl)indolin-2-one as versatile intermediate for retro-Henry and Friedel-Crafts alkylation reactions in aqueous medium**

Sakkani Nagaraju, Kota Sathish, Banoth Paplal, Neeli Satyanarayana and Dhurke Kashinath\*

Department of Chemistry, National Institute of Technology, Warangal-506 004, India

Corresponding Author: e-mail: kashinath@nitw.ac.in; kashinath.dhurke@gmail.com

Tel. +91-870-2462677; FAX No. +91-870-2459547

**General procedure for one-pot synthesis 3-hydroxy-indolyl-2-oxindole (15a-15z):** To a solution of Henry adduct (1 mmol) in water (2 mL) was added indole (1 mmol) and stirred at 80 °C for 2 h. After completion of the reaction (monitored by TLC), the contents were cooled to room temperature and filtered [by washing with water (3X10 mL) followed by EtOAc:Hexane (1:9; 2X5 mL) to remove unreacted isatin derivative and 3,5-dimethyl-4-nitroisoxazole] to give the desired product as solid in pure form.

**General procedure for one-pot synthesis of bis-3,3-(indol-3-yl)indolin-2-ones derivatives (16a-16n, 19a-19n and 21a-21e):** To a solution of Henry adduct (1 mmol) in water (2 mL) was added indole (1 mmol) and stirred at 80 °C for 2 h. After completion of the reaction (monitored by TLC), different/same indole/electron rich arene (1 mmol) and 10 mol% of *p*TsOH were added and refluxing continued for another 30 min. After completion of reaction, the contents were cooled to room temperature and filtered [by washing with water (3X10 mL) followed by EtOAc:Hexane (1:9; 2X5 mL) to remove unreacted isatin derivative and 3,5-dimethyl-4-nitroisoxazole] to give the desired product as solid in pure form.

**Procedure for synthesis of 2-(3-Hydroxy-2-oxoindolin-3-yl)acetic acids (24a-24h):** To a solution of Henry adduct (1 mmol) in THF (2 mL) was added KMnO<sub>4</sub> [12 mmol; in acetone and water (3:3 mL)] and stirred at room temperature for 2 h. After completion of the reaction (monitored by TLC), the reaction mixture was extracted with EtOAc (3X10 mL). The combined organic layers were dried using sodium sulfate. Evaporation of the solvent under reduced pressure gave crude product which was purified by silica gel column chromatography. Elution of the column with EtOAc:Hexane (1:1) gave desired products as solids.

**Comparison of the melting point of the reported compounds  
3-hydroxy-3-indolyl-oxindole derivatives (15a-15k, 15r)**

| S. No. | Compound. No. | Found MP °C | Reported MP °C        |
|--------|---------------|-------------|-----------------------|
| 1      | 15a           | 293-295     | 294-296 <sup>1a</sup> |
| 2      | 15b           | 192-193     | 196-198 <sup>1a</sup> |
| 3      | 15c           | 206-208     | 206-208 <sup>1c</sup> |
| 4      | 15d           | 234-236     | 236-238 <sup>1b</sup> |
| 5      | 15e           | >300        | >300 <sup>1c</sup>    |
| 6      | 15f           | 154-156     | 155-157 <sup>1c</sup> |
| 7      | 15g           | 177-178     | 178-180 <sup>1a</sup> |
| 8      | 15h           | 214-216     | 212-214 <sup>1a</sup> |
| 9      | 15i           | 189-191     | 191-193 <sup>1c</sup> |
| 10     | 15j           | 135-137     | 138-139 <sup>1d</sup> |
| 11     | 15k           | 118-120     | 115-118 <sup>1b</sup> |
| 12     | 15r           | 146-147     | 148-150 <sup>1d</sup> |

**Symmetrical/unsymmetrical bis-3,3-(indol-3-yl)indolin-2-ones (16a-16e, 16g-16j, 16l, 16m and 19a)**

| S. No. | Compound. No. | Found MP (°C) | Reported MP (°C)          |
|--------|---------------|---------------|---------------------------|
| 1      | 16a           | >300          | >300 <sup>2a</sup>        |
| 2      | 16b           | 174-176       | -                         |
| 3      | 16c           | 288-290       | 290-291 <sup>2a</sup>     |
| 4      | 16d           | 288-289       | 284-286 <sup>2e</sup>     |
| 5      | 16e           | 180-182       | -                         |
| 6      | 16g           | >300          | 298-300 <sup>2b</sup>     |
| 7      | 16h           | 136-137       | 136-138 <sup>2b</sup>     |
| 8      | 16i           | >300          | 302-303 <sup>2b, 2c</sup> |
| 9      | 16j           | >300          | >300 <sup>2b</sup>        |
| 10     | 16l           | 286-288       | 284-286 <sup>2d</sup>     |
| 11     | 16m           | 290-292       | 294-296 <sup>2a</sup>     |
| 13     | 19a           | 295-297       | 297-291 <sup>2c</sup>     |

- V. Pavan Kumar, V. Prakash Reddy, R. Sridhar, B. Srinivas, M. Narender, K. Rama Rao, *J. Org. Chem.*, 2008, **73**, 1646; b) T. Jun, H. Lu-Shan, X. Da-Zhen, *New J. Chem.*, 2017, **41**, 3966; c) A. Kumar, R. Dutt Shukla, D. Yadav, L. Prakash Gupta, *RSC Adv.*, 2015, **5**, 52062; d) G. Srihari, M. Marthanda Murthy, *Syn. Comm.*, 2011, **41**, 2684.
- G. Brahmachari, B. Banerjee, *ACS Sustainable Chem. Eng.* 2014, **2**, 2802; b) P. Paira *et al.*, *Bioorg. Med. Chem. Lett.*, 2009, **19**, 4786. c) M. Nikpassand, M. Mamaghani, K. Tabatabaeian, H. Alah Samimi, *Syn. Comm.*, 2010, **40**, 3552; d) K. Rad-Moghadam, M. Sharifi-Kiasaraie, H. Taheri-Amlashi, *Tetrahedron*, 2010, **66**, 2316. e) K. Nikoofar, *Arabian Journal of Chemistry*, 2017, **10**, 283.

**3-hydroxy-1-methyl-3-(2-methyl-1H-indol-3-yl)indolin-2-one (15i):**

Yellow solid, (90% yield), M.P: 189 - 191 °C; <sup>1</sup>H NMR (300 MHz, CDCl<sub>3</sub>+DMSO): δ 10.35 (s, 1H), 7.31 (dd, *J* = 12.0, 7.4 Hz, 2H), 7.16 (dd, *J* =

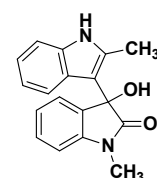

19.0, 7.9 Hz, 2H), 7.02 – 6.89 (m, 3H), 6.80 (t,  $J = 7.4$  Hz, 1H), 6.13 (s, 1H), 3.24 (s, 3H), 2.41 (s, 3H)

**3-hydroxy-3-(1H-indol-3-yl)-1-propylindolin-2-one (15l):**

Yellow solid, (88% yield), M.P: 132 - 134 °C;  $^1\text{H}$  NMR (400 MHz,  $\text{CDCl}_3$ ):  $\delta$  8.22 (s, 1H), 7.56 (d,  $J = 8.0$  Hz, 1H), 7.47 (d,  $J = 7.1$  Hz, 1H), 7.34 (ddd,  $J = 8.1, 7.1, 3.1$  Hz, 2H), 7.16 (t,  $J = 7.3$  Hz, 1H), 7.06 (dd,  $J = 13.4, 6.1$  Hz, 2H), 6.95 (d,  $J = 7.8$  Hz, 1H), 4.00 – 3.59 (m, 2H), 3.53 – 3.29 (m, 1H), 1.74 – 1.54 (m, 2H), 1.32 (t,  $J = 7.2$  Hz, 3H).

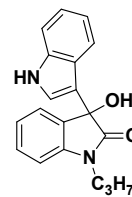

**1-benzyl-3-hydroxy-3-(1H-indol-3-yl)indolin-2-one (15m):**

White solid, (88% yield), M.P: 134 - 136 °C;  $^1\text{H}$  NMR (400 MHz, DMSO):  $\delta$  (ppm) 11.05 (s, 1H), 7.36 – 7.32 (m, 4H), 7.30 (d,  $J = 7.2$  Hz, 2H), 7.28 – 7.24 (m, 2H), 7.11 (s, 1H), 7.00 (dt,  $J = 12.3, 8.9$  Hz, 3H), 6.82 (dd,  $J = 11.6, 7.1$  Hz, 1H), 6.62 (d,  $J = 4.3$  Hz, 1H), 4.91 (s, 2H).  $^{13}\text{C}$  NMR (101 MHz, DMSO):  $\delta$  (ppm) 177.31, 142.59, 137.31, 136.82, 133.23, 129.58, 129.04, 127.89, 125.32, 125.06, 124.15, 123.01, 121.66, 120.87, 118.99, 115.62, 112.05, 109.68, 75.22, 43.17. Mass (ESI-MS):  $m/z$  Calculated:  $\text{C}_{23}\text{H}_{18}\text{N}_2\text{O}_2$ : 354; Observed: 353 (M-1).

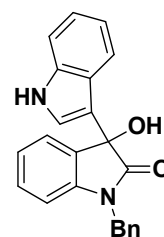

**1-benzyl-5-chloro-3-hydroxy-3-(1H-indol-3-yl)indolin-2-one (15n):**

White solid, (92% yield), M.P: 134 - 136 °C;  $^1\text{H}$  NMR (400 MHz, DMSO):  $\delta$  (ppm) 11.11 (s, 1H), 7.36 – 7.32 (m, 9H), 7.04 (d,  $J = 7.2$  Hz, 2H), 6.85 – 6.77 (m, 2H), 4.93 (s, 2H).  $^{13}\text{C}$  NMR (101 MHz, DMSO):  $\delta$  (ppm) 176.89, 141.43, 137.31, 136.48, 135.23, 129.38, 129.08, 127.89, 125.11, 125.06, 124.99, 123.01, 121.76, 120.63, 119.99, 114.86, 112.16, 111.32, 93.99, 75.20, 43.23. Mass (ESI-MS):  $m/z$  Calculated:  $\text{C}_{23}\text{H}_{17}\text{ClN}_2\text{O}_2$ : 388; Observed: 387 (M-1).

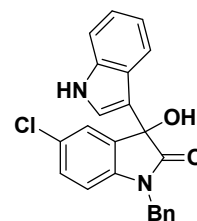

**1-benzyl-5-bromo-3-hydroxy-3-(1H-indol-3-yl)indolin-2-one (15o):**

White solid, (88% yield), M.P: 197 - 199 °C;  $^1\text{H}$  NMR (400 MHz, DMSO):  $\delta$  (ppm) 11.32 (s, 1H), 7.75 (s, 1H), 7.49 (d,  $J = 11.6$  Hz, 2H), 7.26 (d,  $J = 36.4$  Hz, 7H), 7.01 (d,  $J = 32.6$  Hz, 2H), 6.83 (s, 1H), 4.90 (s, 2H).  $^{13}\text{C}$  NMR (101 MHz, DMSO):  $\delta$  (ppm) 176.52, 141.88, 136.32, 136.08, 134.91, 132.53, 129.17, 128.01, 127.78, 127.62, 127.32, 127.17, 125.85, 124.43, 123.48, 114.99, 114.56, 114.26, 111.94, 74.90, 43.21. Mass (ESI-MS):  $m/z$  Calculated:  $\text{C}_{23}\text{H}_{17}\text{BrN}_2\text{O}_2$ : 432.05; Observed: 455.0380 (M+Na).

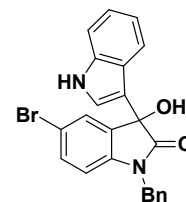

**1-benzyl-3-(5-bromo-1H-indol-3-yl)-3-hydroxyindolin-2-one (15p):**

White solid (92% yield), M.P: 183 - 185 °C;  $^1\text{H}$  NMR (400 MHz, DMSO):  $\delta$  (ppm) 11.27 (s, 1H), 7.70 (d,  $J = 6.8$  Hz, 1H), 7.38 – 7.28 (m, 7H), 7.18 (d,  $J =$

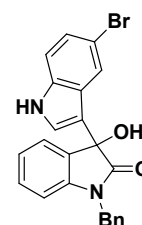

8.6 Hz, 1H), 7.07 (t,  $J = 7.5$  Hz, 1H), 7.03 – 6.94 (m, 2H), 6.68 (s, 1H), 4.95 – 4.83 (m, 2H).  $^{13}\text{C}$  NMR (101 MHz, DMSO):  $\delta$  (ppm) 177.05, 142.64, 136.79, 136.04, 132.30, 129.76, 129.10, 127.68, 125.64, 125.01, 124.19, 123.77, 122.99, 117.48, 115.37, 114.08, 111.75, 109.70, 74.93, 43.14. Mass (ESI-MS):  $m/z$  Calculated:  $\text{C}_{23}\text{H}_{17}\text{BrN}_2\text{O}_2$ : 432.05; Observed: 455.0380 (M+Na).

**1-benzyl-5-bromo-3-(5-bromo-1H-indol-3-yl)-3-hydroxyindolin-2-one (15q):**

White solid, (88% yield), M.P: 209 - 211 °C;  $^1\text{H}$  NMR (400 MHz, DMSO):  $\delta$  11.32 (s, 1H), 7.75 (s, 1H), 7.49 (d,  $J = 11.6$  Hz, 1H), 7.26 (d,  $J = 36.4$  Hz, 7H), 7.01 (d,  $J = 32.6$  Hz, 2H), 6.83 (s, 1H), 4.90 (s, 2H).  $^{13}\text{C}$  NMR (101 MHz, DMSO):  $\delta$  176.52, 141.88, 136.32, 136.08, 134.91, 132.53, 129.17, 128.01, 128.01, 127.78, 127.62, 127.17, 125.85, 124.43, 123.48, 114.99, 114.56, 114.26, 111.94, 74.90, 43.21. Mass (ESI-MS):  $m/z$  Calculated:  $\text{C}_{23}\text{H}_{16}\text{Br}_2\text{N}_2\text{O}_2$ : 509.96; Observed: 532.9479 (M+Na).

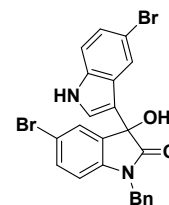

**1-allyl-3-hydroxy-3-(1H-indol-3-yl)indolin-2-one (15r):**

White solid, (89% yield), M.P: 146 - 147 °C;  $^1\text{H}$  NMR (400 MHz, DMSO):  $\delta$  (ppm) 11.04 (s, 1H), 7.33 (t,  $J = 7.3$  Hz, 4H), 7.09 – 6.98 (m, 4H), 6.87 (t,  $J = 7.4$  Hz, 1H), 6.52 (s, 1H), 5.92 – 5.76 (m, 1H), 5.28 – 5.10 (m, 2H), 4.42 – 4.21 (m, 2H).  $^{13}\text{C}$  NMR (101 MHz, DMSO):  $\delta$  (ppm) 176.89, 142.65, 137.30, 133.18, 132.43, 129.55, 125.40, 124.99, 124.11, 122.86, 121.61, 120.91, 119.02, 117.45, 115.65, 112.04, 109.60, 75.13, 41.92. Mass (ESI-MS):  $m/z$  Calculated:  $\text{C}_{19}\text{H}_{16}\text{N}_2\text{O}_2$ : 304; Observed: 303 (M-1).

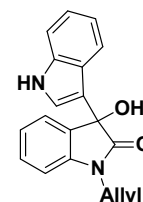

**1-allyl-3-(5-bromo-1H-indol-3-yl)-3-hydroxyindolin-2-one (15t):**

White solid, (92% yield), M.P: 185 - 187 °C;  $^1\text{H}$  NMR (400 MHz, DMSO):  $\delta$  (ppm) 11.30 (s, 1H), 7.81 (d,  $J = 5.4$  Hz, 1H), 7.44 (dd,  $J = 8.3, 1.9$  Hz, 1H), 7.40 – 7.31 (m, 2H), 7.20 (d,  $J = 8.6$  Hz, 1H), 7.07 (d,  $J = 8.4$  Hz, 1H), 7.02 (s, 1H), 6.75 (d,  $J = 4.2$  Hz, 1H), 5.83 (ddd,  $J = 15.7, 9.9, 4.8$  Hz, 1H), 5.26 – 5.10 (m, 2H), 4.31 (qd,  $J = 16.6, 4.3$  Hz, 2H).  $^{13}\text{C}$  NMR (101 MHz, DMSO):  $\delta$  (ppm) 176.24, 141.50, 136.08, 134.59, 131.99, 129.58, 127.28, 127.09, 125.74, 125.02, 124.34, 123.70, 117.65, 114.71, 114.19, 111.88, 111.36, 74.89, 41.96. Mass (ESI-MS):  $m/z$  Calculated:  $\text{C}_{19}\text{H}_{15}\text{BrN}_2\text{O}_2$ : 383; Observed: 381 (M-2).

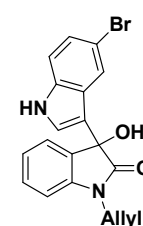

**1-allyl-3-(5-bromo-1H-indol-3-yl)-5-chloro-3-hydroxyindolin-2-one (15u):**

White solid, (90% yield), M.P: 169 - 172 °C;  $^1\text{H}$  NMR (400 MHz, DMSO)  $\delta$  11.29 (s, 1H), 7.80 (s, 1H), 7.44 (d,  $J = 7.9$  Hz, 1H), 7.36 (s, 1H), 7.20 (d,  $J = 8.4$  Hz, 1H),

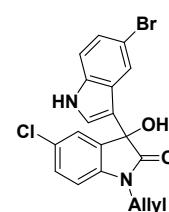

7.07 (d,  $J = 8.3$  Hz, 1H), 7.01 (s, 1H), 6.74 (s, 1H), 5.88 – 5.76 (m, 1H), 5.23 – 5.12 (m, 2H), 4.30 (dd,  $J = 33.0, 14.6$  Hz, 2H).  $^{13}\text{C}$  NMR (101 MHz, DMSO):  $\delta$  176.23, 141.49, 136.08, 134.58, 131.99, 129.58, 127.29, 127.09d, 125.74, 125.02, 124.33, 123.70, 117.65, 114.70, 114.19, 111.87, 111.36, 74.89, 41.96.

**1-allyl-5-bromo-3-hydroxy-3-(1H-indol-3-yl)indolin-2-one (15v):**

White solid, (92% yield), M.P: 139 - 141 °C;  $^1\text{H}$  NMR (400 MHz, DMSO):  $\delta$  (ppm) 11.29 (s, 1H), 7.79 (s, 1H), 7.57 (d,  $J = 8.3$  Hz, 1H), 7.47 (s, 1H), 7.35 (d,  $J = 8.6$  Hz, 1H), 7.20 (d,  $J = 7.6$  Hz, 1H), 7.03 (d,  $J = 8.6$  Hz, 2H), 6.74 (s, 1H), 5.82 (m, 1H), 5.18 (t, 2H), 4.30 (qd,  $J = 16.5, 4.5$  Hz, 2H).  $^{13}\text{C}$  NMR (101 MHz, DMSO):  $\delta$  (ppm) 176.11, 141.91, 136.07, 134.94, 132.44, 131.96, 127.70, 127.25, 125.73, 124.34, 123.66, 117.65, 114.80, 114.69, 114.20, 111.90, 74.84, 41.93. Mass (ESI-MS):  $m/z$  Calculated:  $\text{C}_{19}\text{H}_{15}\text{BrN}_2\text{O}_2$ : 383; Observed: 383 (M).

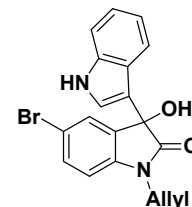

**1-allyl-5-bromo-3-(5-bromo-1H-indol-3-yl)-3-hydroxyindolin-2-one (15w):**

White solid, (92% yield), M.P: 198 - 200 °C;  $^1\text{H}$  NMR (400 MHz, DMSO):  $\delta$  11.29 (s, 1H), 7.79 (s, 1H), 7.57 (d,  $J = 8.3$  Hz, 1H), 7.47 (s, 1H), 7.35 (d,  $J = 8.6$  Hz, 1H), 7.20 (d,  $J = 7.6$  Hz, 1H), 7.01 (s, 1H), 6.74 (s, 1H), 5.82 (ddd,  $J = 15.4, 9.9, 4.9$  Hz, 1H), 5.24 – 5.12 (m, 2H), 4.30 (qd,  $J = 16.5, 4.5$  Hz, 2H).  $^{13}\text{C}$  NMR (101 MHz, DMSO):  $\delta$  176.11, 141.91, 136.07, 134.94, 132.44, 131.96, 127.70, 127.25, 125.73, 124.34, 123.66, 117.65, 114.80, 114.69, 114.20, 111.90, 74.84, 41.93.

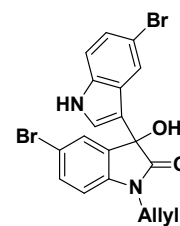

**Ethyl 2-(3-hydroxy-3-(1H-indol-3-yl)-2-oxoindolin-1-yl)acetate (15x):**

White solid, (92% yield), M.P: 124 - 126 °C;  $^1\text{H}$  NMR (400 MHz, DMSO):  $\delta$  (ppm) 11.04 (s, 1H), 7.47 (d,  $J = 7.7$  Hz, 1H), 7.32 (t,  $J = 9.2$  Hz, 3H), 7.14 – 6.98 (m, 4H), 6.87 (t,  $J = 7.2$  Hz, 1H), 6.59 (s, 1H), 4.57 (dd,  $J = 42.1, 17.7$  Hz, 2H), 4.15 (dd,  $J = 13.5, 6.5$  Hz, 2H), 1.19 (t,  $J = 6.8$  Hz, 3H).  $^{13}\text{C}$  NMR (101 MHz, DMSO):  $\delta$  (ppm) 177.15, 168.42, 142.42, 137.21, 132.92, 129.53, 125.32, 124.91, 124.14, 123.10, 121.62, 121.01, 119.01, 115.53, 111.92, 109.37, 75.02, 61.60, 14.47. Mass (ESI-MS):  $m/z$  Calculated:  $\text{C}_{20}\text{H}_{18}\text{N}_2\text{O}_4$ : 350; Observed: 349 (M-1).

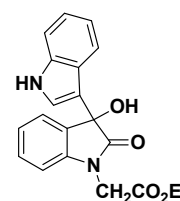

**ethyl 2-(5-chloro-3-hydroxy-3-(1H-indol-3-yl)-2-oxoindolin-1-yl)acetate (15y):**

White solid, (90% yield), M.P: 162 - 164 °C;  $^1\text{H}$  NMR (400 MHz, DMSO):  $\delta$  (ppm) 11.09 (s, 1H), 7.49 (d,  $J = 7.9$  Hz, 1H), 7.38 (dd,  $J = 20.0, 8.1$  Hz, 2H), 7.29 (s, 1H),

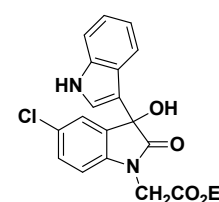

7.13 (d,  $J = 8.1$  Hz, 2H), 7.05 (t,  $J = 7.4$  Hz, 1H), 6.90 (t,  $J = 7.4$  Hz, 1H), 6.74 (s, 1H), 4.60 (q,  $J = 17.7$  Hz, 2H), 4.15 (q,  $J = 6.9$  Hz, 2H), 1.19 (t,  $J = 7.0$  Hz, 3H).  $^{13}\text{C}$  NMR (101 MHz, DMSO):  $\delta$  (ppm) 176.69, 168.25, 141.35, 137.23, 134.93, 129.32, 127.11, 125.14, 124.81, 124.25, 121.75, 120.81, 119.19, 114.80, 112.05, 111.20, 75.01, 61.64, 41.61, 14.47. Mass (ESI-MS):  $m/z$  Calculated:  $\text{C}_{20}\text{H}_{17}\text{ClN}_2\text{O}_4$ : 384; Observed: 383 (M-1).

***1,1'-(hexane-1,6-diyl)bis(3-(5-bromo-1H-indol-3-yl)-3-hydroxyindolin-2-one) (15z):***

White solid, (87% yield), M.P: 218 - 220 °C;  $^1\text{H}$  NMR (400 MHz, DMSO):  $\delta$  (ppm) 11.21 (s, 4H), 7.58 (s, 4H), 7.35-7.29 (m, 5H), 7.14 (d,  $J = 8.1$  Hz, 2H), 7.07 – 7.01 (m, 5H), 6.50 (s, 2H), 3.59 (d,  $J = 36.6$  Hz, 4H), 1.53 (s, 4H), 1.29 (s, 4H).  $^{13}\text{C}$  NMR (101 MHz, DMSO):  $\delta$  (ppm) 176.75, 142.88, 135.97, 132.74, 129.85, 127.22, 125.61, 125.01, 124.09, 123.35, 122.81, 115.50, 114.04, 111.68, 109.21, 74.78, 27.33, 26.49. Mass (ESI-MS):  $m/z$  Calculated: 766.08; Observed: 789.0735(M+ Na).

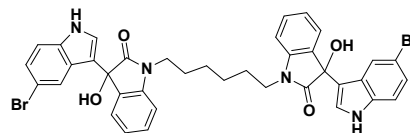

***[3,3':3',3''-terindolin]-2'-one (16b)***

Yield = (93 %) m.p: 174-176 °C;  $^1\text{H}$  NMR (400 MHz,  $\text{CDCl}_3$ +DMSO)  $\delta$  10.43 (s, 2H), 10.24 (s, 1H), 7.33 (dd,  $J = 6.0, 3.5$  Hz, 4H), 7.24 – 7.14 (m, 2H), 7.01 (dd,  $J = 13.7, 7.2$  Hz, 3H), 6.95 – 6.88 (m, 3H), 6.81 (t,  $J = 7.4$  Hz, 2H).

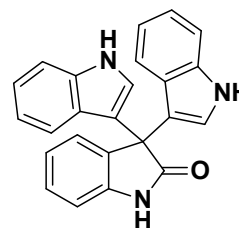

***1'-methyl-1H,1''H-[3,3':3',3''-terbenzo[b]pyrrol]-2'(1'H)-one (16c):***

White solid (95% yield), m.p: 288 - 290 °C;  $^1\text{H}$  NMR (400 MHz, DMSO):  $\delta$  (ppm) 10.63 (s, 1H), 7.37 (d,  $J = 8.2$  Hz, 2H), 7.22 (t,  $J = 7.7$  Hz, 4H), 7.08 (t,  $J = 7.5$  Hz, 2H), 6.98 (d,  $J = 7.6$  Hz, 1H), 6.92 (t,  $J = 7.6$  Hz, 1H), 6.88 (s, 2H), 6.83 (t,  $J = 7.5$  Hz, 2H), 2.49 (s, 3H).  $^{13}\text{C}$  NMR (101 MHz, DMSO):  $\delta$  (ppm) 179.04, 141.73, 137.80, 134.98, 128.93, 128.38, 126.50, 125.36, 122.05, 121.56, 121.41, 118.88, 113.92, 110.23, 52.87, 32.80.

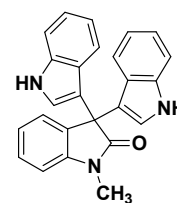

***1'-ethyl-1H,1''H-[3,3':3',3''-terbenzo[b]pyrrol]-2'(1'H)-one (16d):***

White solid, (90% yield), M.P: 288 - 289 °C;  $^1\text{H}$  NMR (400 MHz, DMSO):  $\delta$  (ppm) 10.97 (s, 2H), 7.35 (d,  $J = 8.3$  Hz, 2H), 7.32 – 7.29 (m, 2H), 7.19 (t,  $J = 7.4$  Hz, 3H), 7.00 (q,  $J = 7.1$  Hz, 3H), 6.85 (d,  $J = 2.0$  Hz, 2H), 6.79 (t,  $J = 7.5$  Hz, 2H), 3.82 (q,  $J = 6.8$  Hz, 2H), 1.24 (t,  $J = 7.0$  Hz, 3H).  $^{13}\text{C}$  NMR (101 MHz, DMSO):  $\delta$  (ppm) 176.99, 142.13, 137.42, 134.42, 128.46, 126.12, 125.30, 124.79, 122.48, 121.46, 121.17, 118.76, 114.56, 112.14, 109.16, 52.69, 34.80, 13.00.

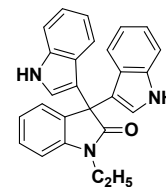

***1'-benzyl-[3,3':3',3''-terindolin]-2'-one(16e)***

Yield = (95 %) m.p: 180-182 °C; <sup>1</sup>H NMR (400 MHz, CDCl<sub>3</sub>+DMSO)

δ 10.43 (s, 2H), 7.34 (d, *J* = 7.2 Hz, 5H), 7.28 (d, *J* = 7.0 Hz, 3H), 7.21 (dd, *J* = 13.8, 7.8 Hz, 3H), 7.03 (t, *J* = 7.4 Hz, 2H), 6.94 (q, *J* = 7.6 Hz, 4H), 6.78 (t, *J* = 7.4 Hz, 1H), 5.00 (s, 2H). <sup>13</sup>C NMR (101 MHz, CDCl<sub>3</sub>+DMSO) δ 177.87, 141.99, 137.32, 136.24, 134.21, 128.71,

127.86, 127.62, 125.96, 125.21, 124.66, 122.49, 121.30, 121.19, 118.64, 114.46, 111.65, 109.14, 52.81, 43.85. Mass (ESI-MS): *m/z* Calculated: 453; Observed: 454(M+1) and 476 (M+Na).

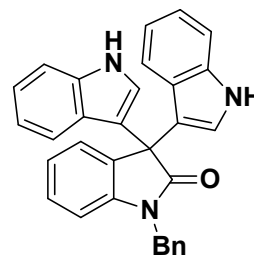

***1,1''-dibenzyl-1H,1''H-[3,3':3',3''-terbenzo[b]pyrrol]-2'(1'H)-one (16f):***

White solid, (90% yield), M.P: 164 - 166 °C; <sup>1</sup>H NMR (400 MHz, DMSO): δ (ppm) 10.68 (s, 1H), 7.37 (d, *J* = 8.3 Hz, 2H), 7.30 (dd, *J* = 13.6, 6.1 Hz, 7H), 7.23 (t, *J* = 7.0 Hz, 4H), 7.13 (d, *J* = 7.3 Hz, 4H), 7.09 (s, 2H), 7.04-6.97 (m, 3H), 6.83 (t, *J* = 7.5 Hz, 2H), 5.37 (s, 4H). <sup>13</sup>C NMR (101 MHz, DMSO): δ (ppm) 178.91, 143.11, 141.76, 138.73, 137.26, 134.66, 130.49, 128.97, 128.51, 127.74, 127.28, 126.82, 125.37, 121.75, 119.03, 114.67, 110.81, 110.22, 52.89, 49.31.

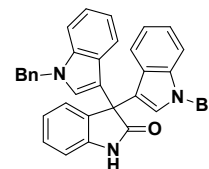

***1'-benzyl-5,5''-dibromo-1H,1''H-[3,3':3',3''-terbenzo[b]pyrrol]-2'(1'H)-one (16h):***

White solid, (90% yield), M.P: 279 - 281 °C; <sup>1</sup>H NMR (400 MHz, DMSO): δ (ppm) 11.28 (s, 2H), 7.38 – 7.25 (m, 11H), 7.15 (dd, *J* = 13.2, 8.3 Hz, 3H), 7.06 (t, *J* = 7.5 Hz, 1H), 6.94 (s, 2H), 5.01 (s, 2H). <sup>13</sup>C NMR (101 MHz, DMSO): δ (ppm) 177.18, 142.15, 136.95, 136.18, 133.20, 129.27, 128.80, 127.97, 127.79, 127.66, 126.56, 125.17, 124.25, 123.09, 114.39, 113.96, 111.66, 110.09, 52.35, 43.60.

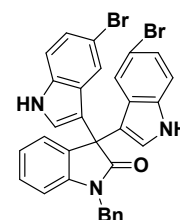

***2,2''-dimethyl-1H,1''H-[3,3':3',3''-terbenzo[b]pyrrol]-2'(1'H)-one (16i):***

White solid, (90% yield), M.P: >300; <sup>1</sup>H NMR (400 MHz, DMSO): δ (ppm) 10.87 (s, 1H), 10.33 (s, 2H), 7.23 (t, 4H), 6.91 (d, *J* = 12.6 Hz, 5H), 6.73 (d, *J* = 6.2 Hz, 2H), 6.27 (s, 1H), 2.50 (s, 3H), 2.40 (s, 3H).

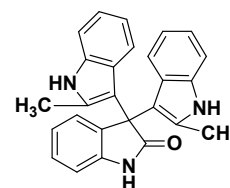

***1'-ethyl-2,2''-dimethyl-1H,1''H-[3,3':3',3''-terbenzo[b]pyrrol]-2'(1'H)-one (16j):***

White solid, (88% yield), M.P: >300 °C; <sup>1</sup>H NMR (400 MHz, DMSO): δ (ppm) 10.90 (s, 1H), 10.86 (s, 1H), 7.32 (t, *J* = 7.7 Hz, 1H), 7.21 (d, *J* = 7.9 Hz, 3H), 7.16 (d, *J* = 7.8 Hz, 1H), 6.95-6.86 (m, 3H), 6.68 – 6.57 (m, 3H), 6.34 (d, *J* = 8.1 Hz, 1H), 3.83 – 3.74 (m, 2H), 2.02 (s, 3H), 1.92 (s, 3H), 1.20 (t, *J* = 7.0 Hz, 3H).

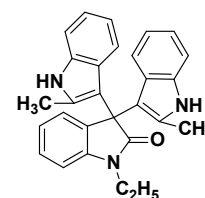

***1'-allyl-5,5''-dibromo-1H,1''H-[3,3':3',3''-terbenzo[b]pyrrol]-2'(1'H)-one (16k):***

White solid, (90% yield), M.P: 284 - 286 °C; <sup>1</sup>H NMR (400 MHz, DMSO): δ (ppm) 11.26 (d, *J* = 1.7 Hz, 2H), 7.37 – 7.32 (m, 5H), 7.26 (d, *J* = 7.3 Hz, 1H), 7.18 – 7.14 (m, 3H), 7.07 (t, *J* = 7.5 Hz, 1H), 6.93 (d, *J* = 2.5 Hz, 2H), 5.98-5.89 (m, 1H), 5.27-5.22 (m, 2H), 4.43 (d, *J* = 5.1 Hz, 2H). <sup>13</sup>C NMR (101 MHz, DMSO): δ (ppm) 176.75, 142.07, 136.16, 133.16, 132.15, 128.78, 127.65, 126.44, 125.17, 124.18, 123.12, 123.03, 118.19, 114.36, 114.03, 111.61, 110.01, 52.24, 42.24.

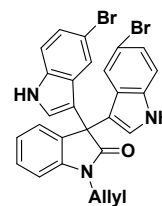

**1'-benzyl-2-methyl-1H, 1''H-[3,3':3',3''-terbenzo[b]pyrrol]-2'(1'H)-one (19c):**

White solid, (87% yield), M.P: 248 - 250 °C; <sup>1</sup>H NMR (400 MHz, DMSO): δ (ppm) 11.00 – 10.84 (m, 2H), 7.29 (s, 10H), 7.07 (d, *J* = 32.8 Hz, 3H), 6.80 (dd, *J* = 45.4, 16.7 Hz, 4H), 6.58 (s, 1H), 4.98 (t, *J* = 19.3 Hz, 2H), 1.81 (d, *J* = 65.9 Hz, 3H). <sup>13</sup>C NMR (101 MHz, DMSO): δ (ppm) 177.62, 142.21, 141.93, 137.49, 136.94, 135.36, 134.99, 134.69, 134.01, 128.99, 128.13, 127.89, 127.74, 126.75, 125.22, 123.81, 123.05, 122.74, 122.10, 121.62, 120.13, 119.52, 118.77, 118.43, 115.48, 112.07, 110.83, 109.76, 109.04, 52.68, 43.38, 13.10. Mass (ESI-MS): *m/z* Calculated: C<sub>32</sub>H<sub>25</sub>N<sub>3</sub>O: 467.20; Observed: 467.1587 (M).

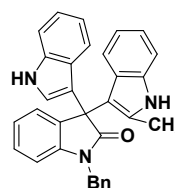

**1'-allyl-2-methyl-1H, 1''H-[3,3':3',3''-terbenzo[b]pyrrol]-2'(1'H)-one (19d):**

White solid, (92% yield), M.P: 272 - 274 °C; <sup>1</sup>H NMR (400 MHz, DMSO): δ (ppm) 10.98 (s, 1H), 10.88 (d, *J* = 27.9 Hz, 1H), 7.36 – 7.19 (m, 5H), 7.08 (d, *J* = 7.7 Hz, 1H), 7.00 (s, 2H), 6.90 – 6.70 (m, 4H), 6.53 (s, 1H), 5.89 (s, 1H), 5.15 (s, 2H), 4.41 (s, 2H), 1.84 (d, *J* = 76.1 Hz, 3H). <sup>13</sup>C NMR (101 MHz, DMSO): δ (ppm) 177.16, 142.18, 137.44, 135.37, 134.89, 133.86, 132.44, 128.21, 126.77, 125.13, 123.79, 122.98, 122.63, 121.59, 120.31, 120.09, 119.45, 118.73, 118.49, 117.25, 116.12, 112.04, 110.85, 109.66, 108.64, 52.58, 42.05, 13.27.

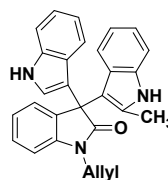

**Ethyl 2-(2-methyl-2'-oxo-1H, 1''H-[3,3':3',3''-terbenzo[b]pyrrol]-1'(2'H)-yl)acetate (19e):**

White solid (81% yield), M.P: 238 - 240 °C; <sup>1</sup>H NMR (400 MHz, DMSO): δ (ppm) 11.25 (s, 1H), 11.02 (s, 1H), 7.51 (s, 1H), 7.37 – 7.22 (m, 5H), 7.16 – 7.13 (m, 2H), 7.03 (dd, *J* = 17.9, 7.7 Hz, 2H), 6.87 (d, *J* = 2.5 Hz, 2H), 6.79 (t, *J* = 7.4 Hz, 1H), 4.66 (s, 2H), 4.18 (q, *J* = 7.0 Hz, 2H), 2.50 (s, 3H), 1.19 (t, *J* = 7.1 Hz, 3H). <sup>13</sup>C NMR (101 MHz, DMSO): δ (ppm) 177.40, 168.49, 142.04, 137.32, 136.18, 133.49, 128.51, 127.90, 126.41, 125.91, 125.06, 124.95, 124.10, 123.89, 122.99, 121.58, 120.81, 118.95, 114.23, 114.14, 114.05, 112.14, 111.49, 109.63, 61.63, 52.32, 41.77, 40.59, 14.49.

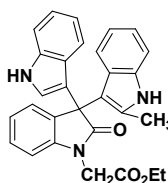

**1'-allyl-5-bromo-[3,3':3',3''-terindolin]-2'-one (19f):**

White solid, (85% yield), M.P: 280 - 283 °C; <sup>1</sup>H NMR (400 MHz, DMSO): δ (ppm) 11.25 (s, 1H), 11.04 (s, 1H), 7.42 - 7.31 (m, 5H), 7.08 (d, *J* = 38.0 Hz,

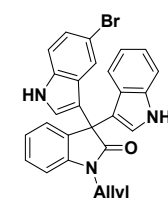



5H), 6.90 (d,  $J = 8.0$  Hz, 2H), 6.81 (s, 1H), 5.91 (s, 1H), 5.19 (d,  $J = 12.1$  Hz, 2H), 4.43 (s, 2H).  $^{13}\text{C}$  NMR (101 MHz, DMSO):  $\delta$  (ppm) 176.98, 142.12, 137.37, 136.18, 133.66, 132.35, 128.58, 127.88, 126.27, 125.90, 125.16, 124.77, 124.09, 123.66, 123.12, 122.86, 121.63, 120.63, 118.99, 117.72, 114.36, 114.29, 111.27, 111.47, 109.87, 52.46, 42.16. Mass (ESI-MS):  $m/z$  Calculated:  $\text{C}_{27}\text{H}_{20}\text{BrN}_3\text{O}$ : 481.08; Observed: 504.0699 (M+2).

***1'-benzyl-5-bromo-[3,3':3',3''-terindolin]-2'-one (19g):***

White solid, (90% yield), M.P: 260 - 262 °C;  $^1\text{H}$  NMR (400 MHz, DMSO):  $\delta$  (ppm) 11.29 (s, 2H), 7.70 (d,  $J = 24.0$  Hz, 1H), 7.33 (d,  $J = 22.2$  Hz, 11H), 7.17 – 7.12 (m, 3H), 7.06 (s, 1H), 6.94 (s, 2H), 5.01 (s, 2H).  $^{13}\text{C}$  NMR (101 MHz, DMSO):  $\delta$  (ppm) 177.20, 142.12, 136.90, 136.16, 133.18, 132.13, 131.99, 129.27, 129.12, 128.82, 128.37, 128.00, 127.77, 127.64, 126.72, 126.52, 126.19, 125.33, 125.15, 124.56, 124.28, 123.17, 123.06, 114.40, 113.96, 111.66, 110.09, 61.84, 52.35. Mass (ESI-MS):  $m/z$  Calculated:  $\text{C}_{31}\text{H}_{22}\text{BrN}_3\text{O}$ : 532.42; Observed: 534.48 (M+2).

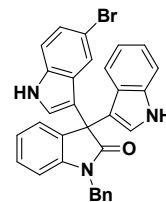

***1'-benzyl-5''-bromo-2-methyl-1H,1''H-[3,3':3',3''-terbenzo[b]pyrrol]-2'(1'H)-one (19h):***

white solid, (90% yield), M.P: 216 - 218 °C;  $^1\text{H}$  NMR (400 MHz, DMSO):  $\delta$  (ppm) 11.25 (s, 1H), 10.93 (d,  $J = 40.7$  Hz, 1H), 7.56 (d,  $J = 55.9$  Hz, 1H), 7.34 - 7.11 (m, 11H), 7.01 – 6.87 (m, 3H), 6.74 – 6.55 (m, 2H), 5.10 – 4.95 (m, 2H), 1.83 (d,  $J = 92.9$  Hz, 3H).  $^{13}\text{C}$  NMR (101 MHz, DMSO):  $\delta$  (ppm) 177.28, 142.19, 136.83 (s), 136.28, 135.35, 134.14, 129.02, 128.45, 128.23, 127.83, 127.07, 125.56, 125.26, 124.95, 124.26, 123.89, 122.94, 120.33, 119.21, 118.61, 115.16, 114.21, 111.51, 110.91, 109.85, 108.80, 99.48, 52.52, 43.48, 12.91. Mass (ESI-MS):  $m/z$  Calculated:  $\text{C}_{32}\text{H}_{24}\text{BrN}_3\text{O}$ : 545.11; Observed: 568.0978 (M+Na).

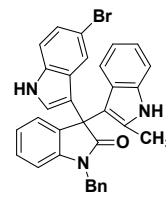

***1'-benzyl-5',5''-dibromo-2-methyl-1H,1''H-[3,3':3',3''-terbenzo[b]pyrrol]-2'(1'H)-one (19i):***

White solid, (82% yield), M.P: 257 - 259 °C;  $^1\text{H}$  NMR (400 MHz, DMSO):  $\delta$  (ppm) 11.31 (s, 1H), 11.00 (d,  $J = 46.5$  Hz, 1H), 7.57 (d,  $J = 69.8$  Hz, 2H), 7.32 - 7.27 (m, 10H), 6.87 (d,  $J = 44.9$  Hz, 2H), 6.47 (d,  $J = 104.2$  Hz, 2H), 5.00 (d,  $J = 42.1$  Hz, 2H), 1.83 (d,  $J = 104.6$  Hz, 3H).  $^{13}\text{C}$  NMR (101 MHz, DMSO):  $\delta$  (ppm) 176.82, 141.41, 136.26, 135.26, 131.41, 131.36, 131.25, 129.09, 128.22, 127.85, 127.74, 125.51, 124.92, 124.52, 120.88, 120.76, 120.59, 119.04, 118.95, 118.85, 118.78, 114.78, 114.36, 114.22, 112.10, 111.29, 107.92, 52.63, 43.54, 12.74. Mass (ESI-MS):  $m/z$  Calculated:  $\text{C}_{32}\text{H}_{23}\text{Br}_2\text{N}_3\text{O}$ : 623.02; Observed: 646.0022 (M+Na).

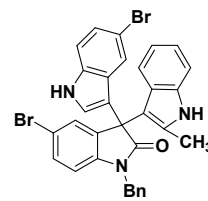

***1'-allyl-5'-chloro-2-methyl-1H,1''H-[3,3':3',3''-terbenzo[b]pyrrol]-2'(1'H)-one(19j):***

White solid (82% yield), M.P: 279 - 281 °C; <sup>1</sup>H NMR (400 MHz, DMSO): δ 11.06 (s, 2H), 7.37 (s, 3H), 7.24 (s, 2H), 7.08 (d, *J* = 38.8 Hz, 2H), 6.83 (d, *J* = 29.5 Hz, 4H), 6.58 (s, 1H), 5.88 (s, 1H), 5.16 (s, 2H), 4.42 (s, 2H), 1.86 (d, *J* = 81.7 Hz, 3H). <sup>13</sup>C NMR (101 MHz, DMSO): δ 176.58, 141.09, 137.39, 136.24, 135.62, 135.39, 132.08, 128.54, 127.71, 126.91, 125.70, 124.19, 123.54, 121.73, 120.32, 119.18, 117.98, 114.35, 113.59, 112.41, 111.56, 111.48, 61.71, 52.64, 14.48. Mass (ESI-MS): *m/z* Calculated: C<sub>28</sub>H<sub>22</sub>ClN<sub>3</sub>O: 451.15; Observed: 474.1360 (M+Na).

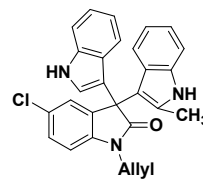

***1'-allyl-1-benzyl-5''-bromo-1H,1''H-[3,3':3',3''-terbenzo[b]pyrrol]-2'(1'H)-one (19k):***

White solid, (84% yield), M.P: 200 - 202 °C; <sup>1</sup>H NMR (400 MHz, DMSO): δ (ppm) 11.26 (s, 1H), 7.58 (s, 1H), 7.36 – 7.34 (m, 6H), 7.24 (t, *J* = 7.2 Hz, 1H), 7.14 (t, *J* = 8.1 Hz, 5H), 7.07–6.99 (m, 3H), 6.91 (s, 1H), 6.81 (t, *J* = 7.5 Hz, 1H), 5.94 - 5.86 (m, 1H), 5.38 (s, 2H), 5.19 – 5.14 (m, 2H), 4.43 (d, *J* = 3.7 Hz, 2H). <sup>13</sup>C NMR (101 MHz, DMSO): δ (ppm) 176.80, 142.12, 138.65, 137.03, 136.29, 133.43, 132.34, 129.09, 128.86, 128.65, 127.95, 127.71, 127.05, 126.55, 125.89, 125.10, 124.16, 124.08, 122.95, 121.85, 120.66, 119.35, 117.64, 114.30, 114.25, 114.04, 111.51, 110.93, 109.95, 52.35, 49.34, 42.13. Mass (ESI-MS): *m/z* Calculated: C<sub>34</sub>H<sub>26</sub>BrN<sub>3</sub>O: 571.49; Observed: 594.13 (M+Na).

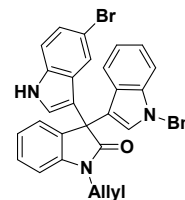

***1'-benzyl-5-bromo-5'-chloro-[3,3':3',3''-terindolin]-2'-one (19l):***

White solid, (90% yield), m.p: 245 - 247 °C; <sup>1</sup>H NMR (400 MHz, DMSO): δ 11.35 (s, 2H), 7.64 – 6.85 (m, 17H), 5.02 (s, 2H). <sup>13</sup>C NMR (101 MHz, DMSO): δ 176.84, 141.11, 136.60, 136.21, 135.12, 129.33, 128.82, 128.10, 127.83, 127.45, 127.21, 126.81, 125.10, 124.38, 122.88, 114.52, 113.17, 111.78, 52.53, 43.71.

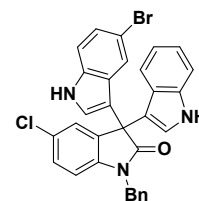

***1'-allyl-5-bromo-5'-chloro-1H,1''H-[3,3':3',3''-terbenzo[b]pyrrol]-2'(1'H)-one(19m):***

White solid, (85% yield), M.P: 285 - 287 °C; <sup>1</sup>H NMR (400 MHz, DMSO): δ 11.32 (s, 1H), 11.11 (s, 1H), 7.45 – 7.34 (m, 4H), 7.27 (s, 1H), 7.18 (t, *J* = 8.1 Hz, 2H), 7.06 (dd, *J* = 17.5, 10.0 Hz, 2H), 6.97 (s, 1H), 6.93 (s, 1H), 6.83 (t, *J* = 7.3 Hz, 1H), 5.91 (ddd, *J* = 15.9, 10.3, 5.1 Hz, 1H), 5.26 – 5.12 (m, 2H), 4.44 (s, 2H). <sup>13</sup>C NMR (101 MHz, DMSO): δ 177.16, 142.18, 137.44, 135.37, 134.89, 133.86, 132.44, 128.21, 126.77, 125.13, 123.79, 122.98, 122.63, 121.59, 120.09, 119.45, 118.73, 118.49, 117.25, 116.12, 112.04, 110.85, 109.66, 108.64, 52.58, 42.05. Mass (ESI-MS): *m/z* Calculated: C<sub>27</sub>H<sub>19</sub>BrClN<sub>3</sub>O: 515.04; Observed: 538.0309 (M+Na).

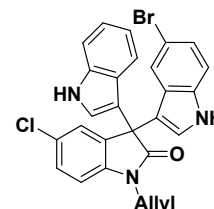

**Ethyl-2-(5-bromo-5'-chloro-2'-oxo-1*H*,1''*H*-[3,3':3',3''-terbenzo[*b*]pyrrol]-1'(2'*H*)-**

**yl)acetate (19n):** White solid, (88% yield), M.P: 280 - 283 °C; <sup>1</sup>H NMR (400 MHz, DMSO): δ (ppm) 11.31 (s, 1H), 11.10 (s, 1H), 7.52 (s, 1H), 7.43 – 7.36 (m, 3H), 7.23 (d, *J* = 7.3 Hz, 3H), 7.16 (d, *J* = 8.6 Hz, 1H), 7.05 (t, *J* = 7.5 Hz, 1H), 6.92 (d, *J* = 11.3 Hz, 2H), 6.82 (t, *J* = 7.5 Hz, 1H), 4.69 (s, 2H), 4.19 (q, *J* = 7.0 Hz, 2H), 1.20 (t, *J* = 7.1 Hz, 3H). <sup>13</sup>C NMR (101 MHz, DMSO): δ (ppm) 177.02, 168.33, 141.03, 137.32, 136.22, 135.37, 128.51, 127.71, 127.03, 126.54, 125.69, 125.16, 124.89, 124.25, 123.74, 121.75, 120.52, 119.18, 114.27, 113.47, 113.23, 112.29, 111.61, 111.38, 61.73, 52.51, 41.88, 14.46. Mass (ESI-MS): *m/z* Calculated: C<sub>28</sub>H<sub>21</sub>BrClN<sub>3</sub>O<sub>3</sub>: 562.84; Observed: 580.56 (M+18).

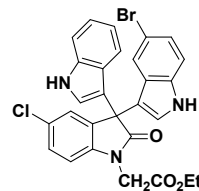

**1-benzyl-3-(4-(dimethylamino)phenyl)-3-(1*H*-indol-3-yl)indolin-2-one (21b):**

White solid, (95% yield), <sup>1</sup>H NMR (400 MHz, CDCl<sub>3</sub>+DMSO): δ 10.91 (s, 1H), 7.36 – 7.23 (m, 7H), 7.18 (dd, *J* = 21.2, 8.0 Hz, 3H), 7.06 – 6.93 (m, 4H), 6.83 – 6.68 (m, 4H), 4.98 (q, *J* = 15.7 Hz, 2H), 2.92 (s, 6H). <sup>13</sup>C NMR (101 MHz, CDCl<sub>3</sub>+DMSO) δ 177.81, 142.04, 137.50, 136.71, 134.27, 128.92, 128.63, 128.08, 127.74, 127.53, 125.89, 125.41, 124.79, 122.67, 121.38, 118.74, 115.71, 113.13, 111.96, 109.61, 56.65, 43.49.

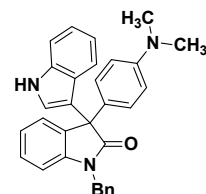

**1-allyl-5-chloro-3-(4-(dimethylamino)phenyl)-3-(1*H*-indol-3-yl)indolin-2-one (21c):**

White solid, (93% yield), <sup>1</sup>H NMR (400 MHz, CDCl<sub>3</sub>+DMSO): δ 10.88 (s, 1H), 7.68 (d, *J* = 7.4 Hz, 1H), 7.53 (d, *J* = 7.8 Hz, 1H), 7.39 (d, *J* = 8.0 Hz, 2H), 7.30 (d, *J* = 8.2 Hz, 1H), 7.15 (d, *J* = 7.3 Hz, 2H), 7.07 (d, *J* = 5.6 Hz, 2H), 6.98 (d, *J* = 8.2 Hz, 1H), 6.87 (d, *J* = 11.4 Hz, 2H), 5.96 – 5.79 (m, 1H), 5.19 (t, *J* = 15.5 Hz, 2H), 4.41 (s, 2H), 3.18 (s, 6H). <sup>13</sup>C NMR (101 MHz, CDCl<sub>3</sub>+DMSO): δ 176.23, 143.50, 143.24, 140.69, 139.40, 137.56, 134.73, 131.17, 129.53, 128.66, 128.47, 127.70, 125.92, 125.36, 125.23, 124.85, 121.76, 120.91, 119.81, 119.19, 117.60, 113.81, 112.15, 110.94, 57.27, 45.62, 42.42, 21.30.

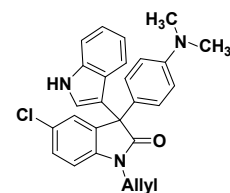

**1-allyl-3-(1*H*-indol-3-yl)-3-(4-(methylamino)phenyl)indolin-2-one (21d):**

White solid, (90% yield), <sup>1</sup>H NMR (400 MHz, CDCl<sub>3</sub>+DMSO): δ 10.71 (s, 1H), 7.36 – 7.22 (m, 3H), 7.10 (d, *J* = 6.6 Hz, 3H), 7.02 (t, *J* = 7.2 Hz, 2H), 6.95 (d, *J* = 7.6 Hz, 1H), 6.81 (s, 2H), 6.61 (d, *J* = 7.7 Hz, 2H), 5.97 – 5.81 (m, 1H), 5.23 – 5.10 (m, 2H), 4.40 (s, 2H), 2.75 (s, 3H). <sup>13</sup>C NMR (101 MHz, CDCl<sub>3</sub>+DMSO) δ 177.54, 147.09, 141.93, 137.44, 134.21, 131.78, 130.15, 128.63, 127.93, 125.95, 125.85, 125.26, 124.58, 122.49, 121.38, 118.70, 117.13, 115.72, 113.42, 111.81, 109.33, 56.75, 42.14, 31.33.

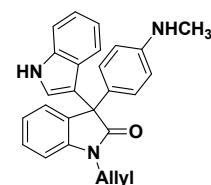

**2-(1-benzyl-3-hydroxy-2-oxoindolin-3-yl)acetic acid (24a):**

White solid, (90% yield), <sup>1</sup>H NMR (400 MHz, CDCl<sub>3</sub>+DMSO): (90% yield), δ 7.40 – 7.27 (m, 3H), 7.20 (dt, *J* = 22.5, 7.2 Hz, 3H), 7.09 (t, *J* = 7.7 Hz, 1H), 6.94 (t, *J* = 7.5 Hz, 1H), 6.57 (d, *J* = 7.8 Hz, 1H), 4.83 (dd, *J* = 72.2, 15.8 Hz, 2H), 3.01 (dd, *J* = 41.1, 15.7 Hz, 2H). <sup>13</sup>C NMR (101 MHz, CDCl<sub>3</sub>+DMSO): δ 176.99, 171.60, 143.10, 135.75, 130.25, 129.51, 128.66, 127.38 (d, *J* = 14.2 Hz), 123.86, 122.74, 109.30, 73.15, 43.75, 41.71. Mass (ESI-MS): *m/z* Calculated: C<sub>17</sub>H<sub>15</sub>NO<sub>4</sub>: 297.31; Observed: 298.10 (M+1).

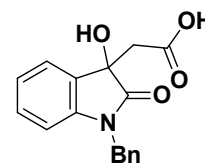**2-(5-chloro-3-hydroxy-1-methyl-2-oxoindolin-3-yl)acetic acid (24b):**

White solid, (92% yield), <sup>1</sup>H NMR (400 MHz, CDCl<sub>3</sub>+DMSO): δ 7.39 (s, 1H), 7.27 (d, *J* = 8.2 Hz, 1H), 6.78 (d, *J* = 8.3 Hz, 1H), 3.16 (s, 3H), 3.06 – 2.94 (m, 2H), 2.56 (d, *J* = 9.6 Hz, 1H). <sup>13</sup>C NMR (101 MHz, CDCl<sub>3</sub>+DMSO) δ 176.50, 174.49, 142.63, 131.99, 129.44, 127.76, 124.30, 109.49, 73.09, 41.57, 26.36. Mass (ESI-MS): *m/z* Calculated: C<sub>11</sub>H<sub>10</sub>ClNO<sub>4</sub>: 255.65; Observed: 276.33 (M+23).

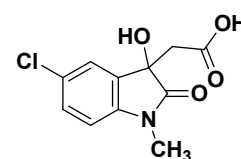**2-(1-benzyl-5-chloro-3-hydroxy-2-oxoindolin-3-yl)acetic acid (24c):**

White solid, (92% yield), <sup>1</sup>H NMR (400 MHz, CDCl<sub>3</sub>+DMSO): (90% yield), δ 7.34 (d, *J* = 6.9 Hz, 1H), 7.23 (ddd, *J* = 20.5, 13.5, 7.0 Hz, 4H), 7.05 (d, *J* = 8.3 Hz, 1H), 6.48 (d, *J* = 8.3 Hz, 1H), 4.94 – 4.71 (m, 2H), 3.11 – 2.91 (m, 2H). <sup>13</sup>C NMR (101 MHz, CDCl<sub>3</sub>+DMSO): δ 176.61, 171.59, 141.71, 135.28, 132.17, 129.21, 128.71, 127.90, 127.55, 127.19, 124.39, 110.35, 73.16, 43.82, 41.58. Mass (ESI-MS): *m/z* Calculated: C<sub>17</sub>H<sub>14</sub>ClNO<sub>4</sub>: 331.75; Observed: 354 (M+23).

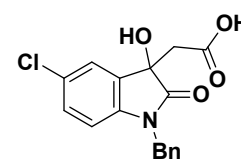**2-(5-bromo-3-hydroxy-1-methyl-2-oxoindolin-3-yl)acetic acid (24d):**

White solid, (88% yield), <sup>1</sup>H NMR (400 MHz, CDCl<sub>3</sub>+DMSO): (88% yield), δ 7.50 (s, 1H), 7.42 (d, *J* = 8.1 Hz, 1H), 6.75 (d, *J* = 8.2 Hz, 1H), 3.16 (s, 3H), 3.02 (q, *J* = 16.0 Hz, 2H). <sup>13</sup>C NMR (101 MHz, CDCl<sub>3</sub>+DMSO): δ 176.39, 174.20, 143.44, 132.74, 132.16, 126.93, 114.79, 109.89, 72.87, 41.94, 29.13. Mass (ESI-MS): *m/z* Calculated: C<sub>11</sub>H<sub>10</sub>BrNO<sub>4</sub>: 300.10; Observed: 323.96 (M+Na).

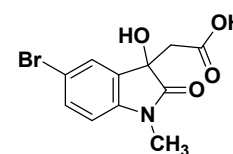**2-(1-benzyl-5-bromo-3-hydroxy-2-oxoindolin-3-yl)acetic acid (24e):**

White solid, (85% yield), <sup>1</sup>H NMR (400 MHz, CDCl<sub>3</sub>+DMSO) (85% yield), δ 7.48 (s, 1H), 7.24 (tt, *J* = 19.4, 9.7 Hz, 6H), 6.46 (d, *J* = 8.3 Hz, 1H), 4.82 (dd, *J* = 70.0, 15.9 Hz, 2H), 3.04 (dd, *J* = 38.8, 16.1 Hz, 2H). <sup>13</sup>C NMR (101 MHz, CDCl<sub>3</sub>+DMSO): δ 176.48, 171.42, 142.27, 135.25, 132.49, 132.17, 128.73, 127.58, 127.21, 127.10, 115.25, 110.93, 73.08, 43.82, 41.54. Mass (ESI-MS): *m/z* Calculated: C<sub>17</sub>H<sub>14</sub>BrNO<sub>4</sub>: 376.20; Observed: 376.01 (M)

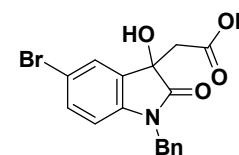

**2-(1-(2-ethoxy-2-oxoethyl)-3-hydroxy-2-oxoindolin-3-yl)acetic acid (24f):**

white solid, (92% yield), <sup>1</sup>H NMR (400 MHz, CDCl<sub>3</sub>): (92% yield), δ 7.44 (d, *J* = 6.9 Hz, 1H), 7.35 – 7.26 (m, 1H), 7.10 (t, *J* = 7.1 Hz, 1H), 6.72 (d, *J* = 7.7 Hz, 1H), 4.42 (s, 2H), 4.20 (dd, *J* = 13.3, 6.4 Hz, 2H), 2.97 (s, 2H), 1.25 (t, *J* = 6.9 Hz, 3H). <sup>13</sup>C NMR (101 MHz, CDCl<sub>3</sub>): δ 176.86, 173.20, 167.71, 141.84, 130.18, 129.05, 124.29, 123.87, 108.78, 73.41, 62.15, 41.43, 41.01, 14.05. Mass (ESI-MS): *m/z* Calculated: C<sub>14</sub>H<sub>15</sub>NO<sub>6</sub>: 293.27; Observed: 292.04 (M-1).

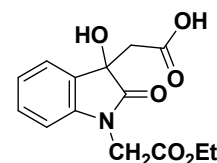

**2-(5-chloro-1-(2-ethoxy-2-oxoethyl)-3-hydroxy-2-oxoindolin-3-yl)acetic acid (24g):**

white solid, (90% yield), <sup>1</sup>H NMR (400 MHz, CDCl<sub>3</sub>): (90% yield), δ 7.34 (s, 1H), 7.17 (d, *J* = 8.3 Hz, 1H), 6.57 (d, *J* = 8.3 Hz, 1H), 4.33 (d, *J* = 4.6 Hz, 2H), 4.11 (q, *J* = 7.0 Hz, 2H), 2.89 (s, 2H), 1.17 (t, *J* = 7.0 Hz, 3H). <sup>13</sup>C NMR (101 MHz, CDCl<sub>3</sub>): δ 176.50, 172.70, 167.64, 140.56, 130.84, 129.97, 129.06, 124.90, 109.89, 73.37, 62.29, 41.48, 40.86, 14.02. Mass (ESI-MS): *m/z* Calculated: C<sub>14</sub>H<sub>14</sub>ClNO<sub>6</sub>: 327.72; Observed: 350.04 (M+23).

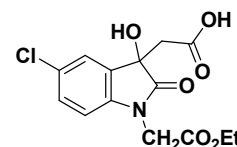

**2-(1-(2-ethoxy-2-oxoethyl)-5-fluoro-3-hydroxy-2-oxoindolin-3-yl)acetic acid (24h):**

white solid, (85% yield), <sup>1</sup>H NMR (400 MHz, CDCl<sub>3</sub>+DMSO): (85% yield), δ 7.17 (d, *J* = 7.5 Hz, 1H), 6.91 (t, *J* = 8.8 Hz, 1H), 6.61 (dd, *J* = 8.4, 3.7 Hz, 1H), 4.34 (dt, *J* = 27.3, 13.4 Hz, 2H), 4.14 (q, *J* = 7.0 Hz, 2H), 2.95 – 2.85 (m, 2H), 1.20 (t, *J* = 7.1 Hz, 3H). <sup>13</sup>C NMR (101 MHz, CDCl<sub>3</sub>+DMSO): δ 176.52, 171.56, 167.47, 158.09, 138.38, 131.63 (d, *J* = 7.7 Hz), 115.86, 115.63, 112.55, 112.30, 109.23 (d, *J* = 7.9 Hz), 73.33, 68.61, 61.75, 41.46, 14.09. Mass (ESI-MS): *m/z* Calculated: C<sub>14</sub>H<sub>14</sub>FNO<sub>6</sub>: 311.26; Observed: 334.07 (M+Na).

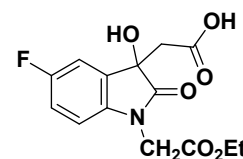

**3-hydroxy-1-methyl-3-(2-methyl-1H-indol-3-yl)indolin-2-one (15i):**



**1-benzyl-3-hydroxy-3-(1H-indol-3-yl)indolin-2-one (15m):**

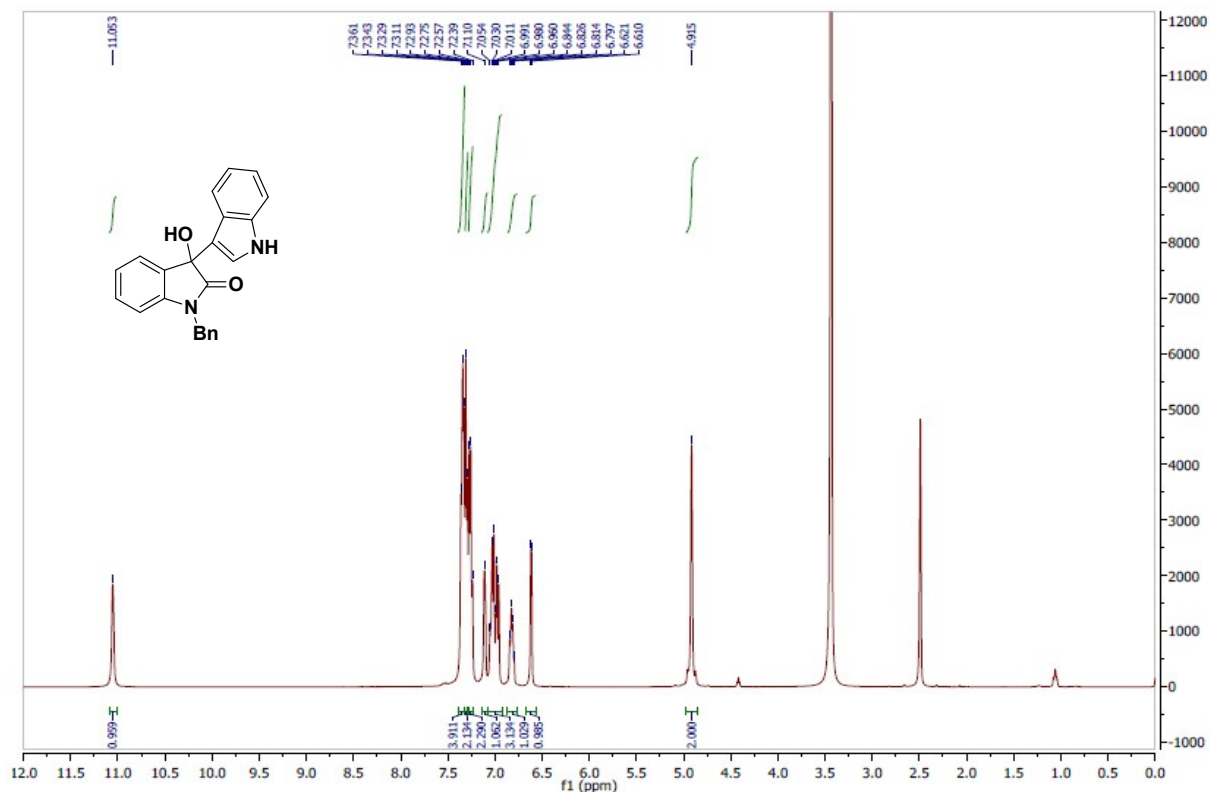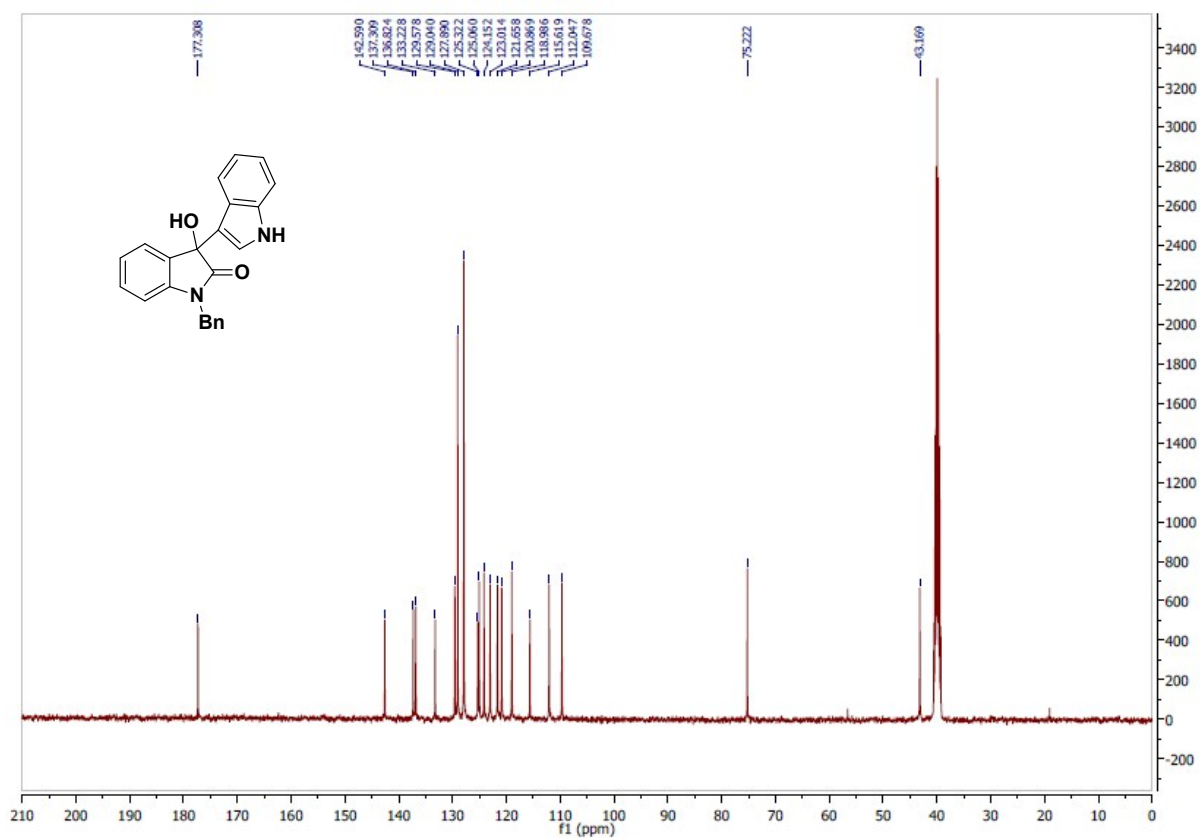

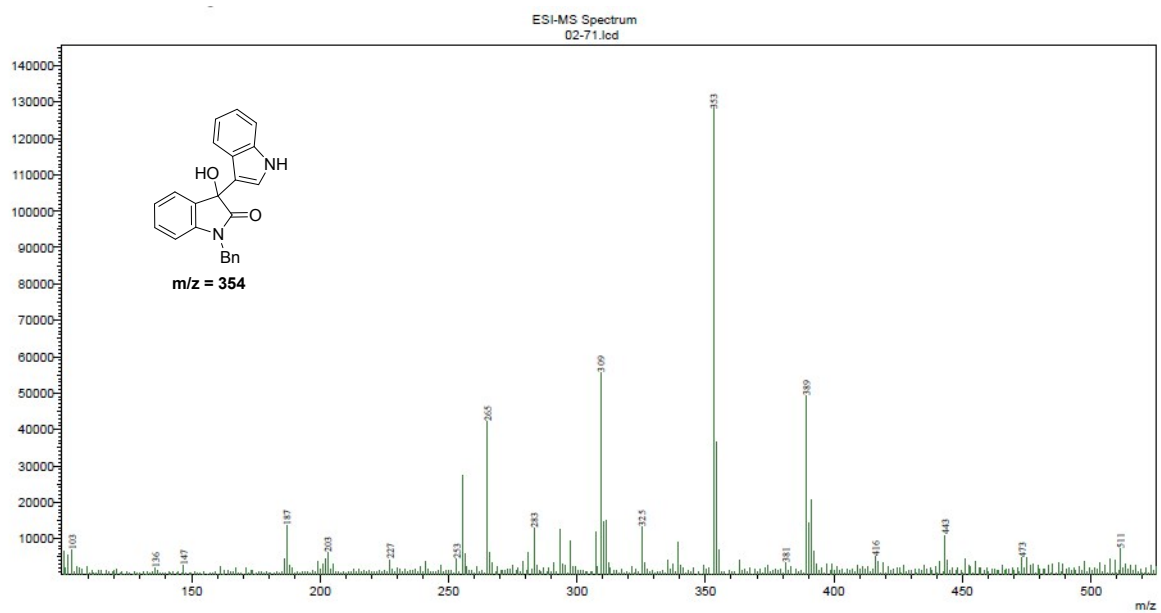

***1-benzyl-5-chloro-3-hydroxy-3-(1H-indol-3-yl)indolin-2-one (15n):***

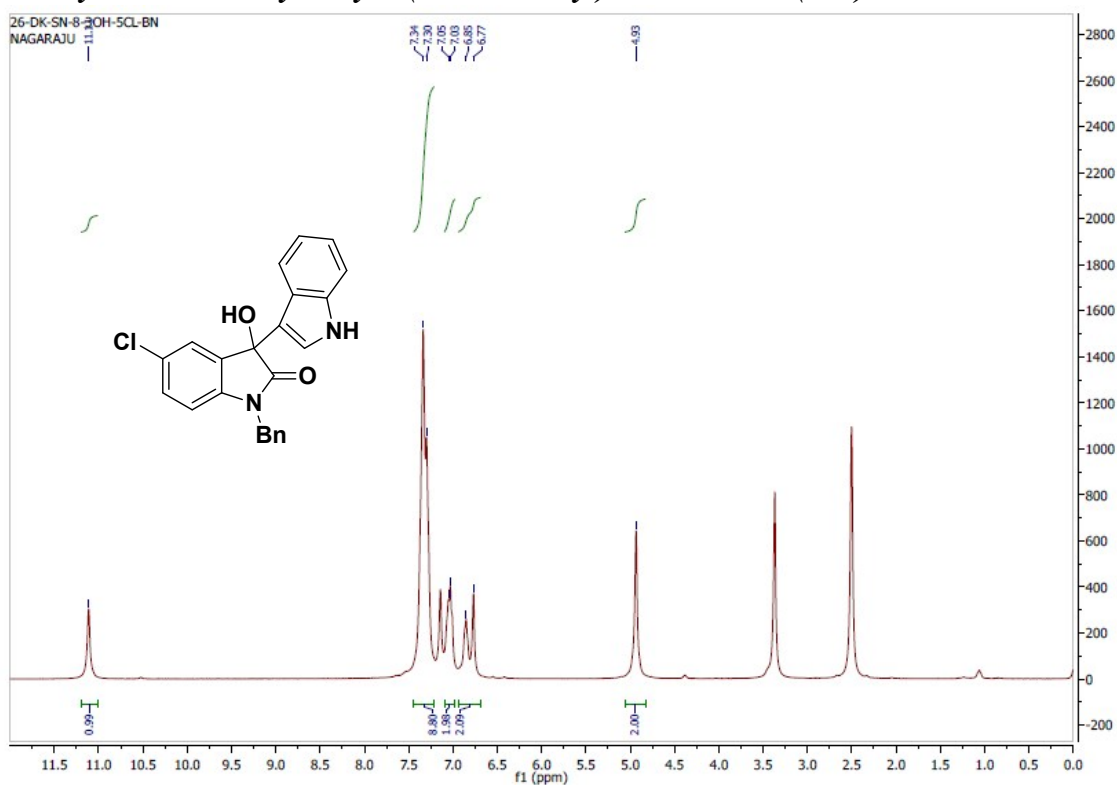



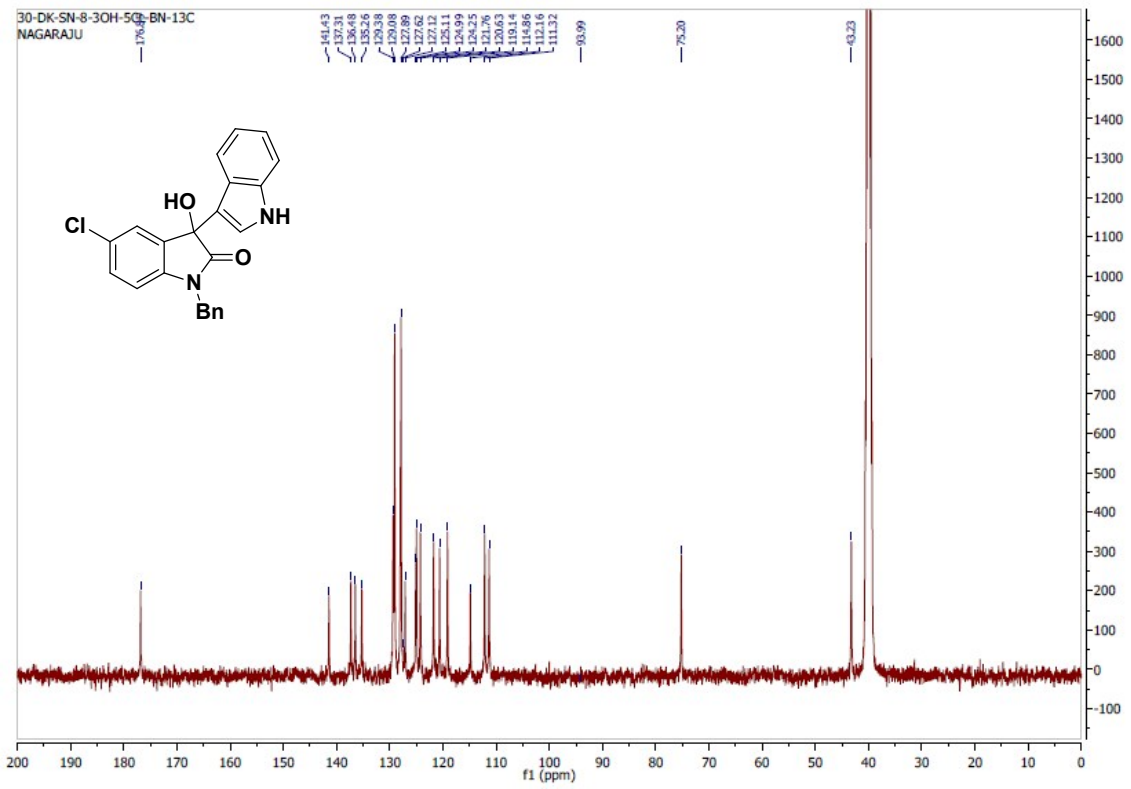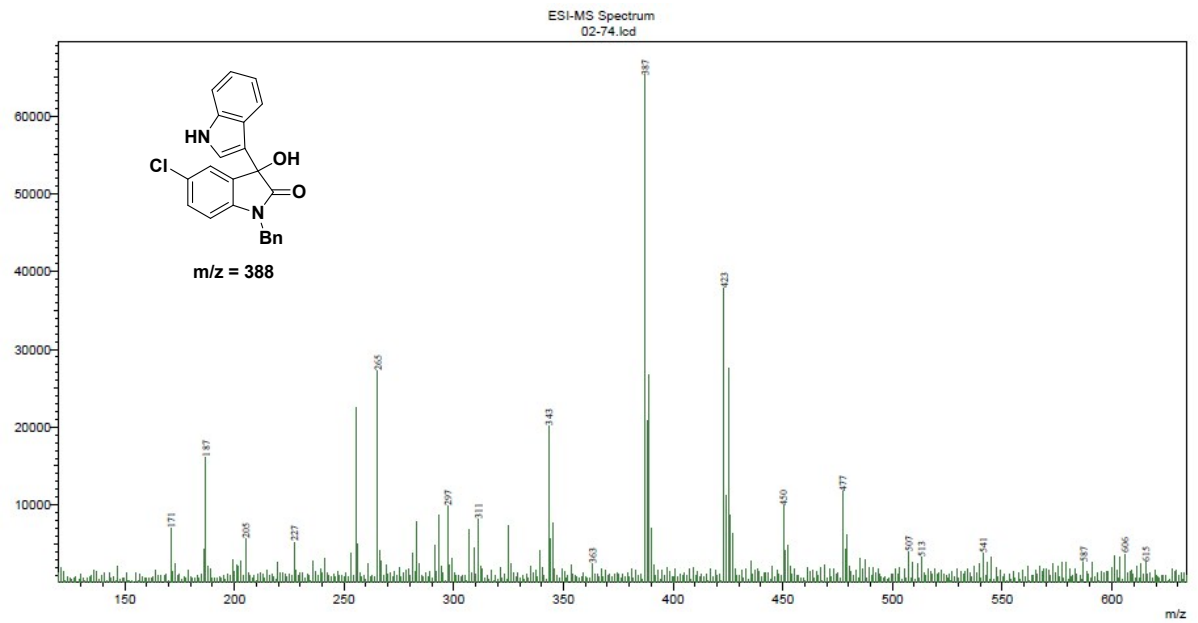

**1-benzyl-5-bromo-3-hydroxy-3-(1H-indol-3-yl)indolin-2-one (15o):**

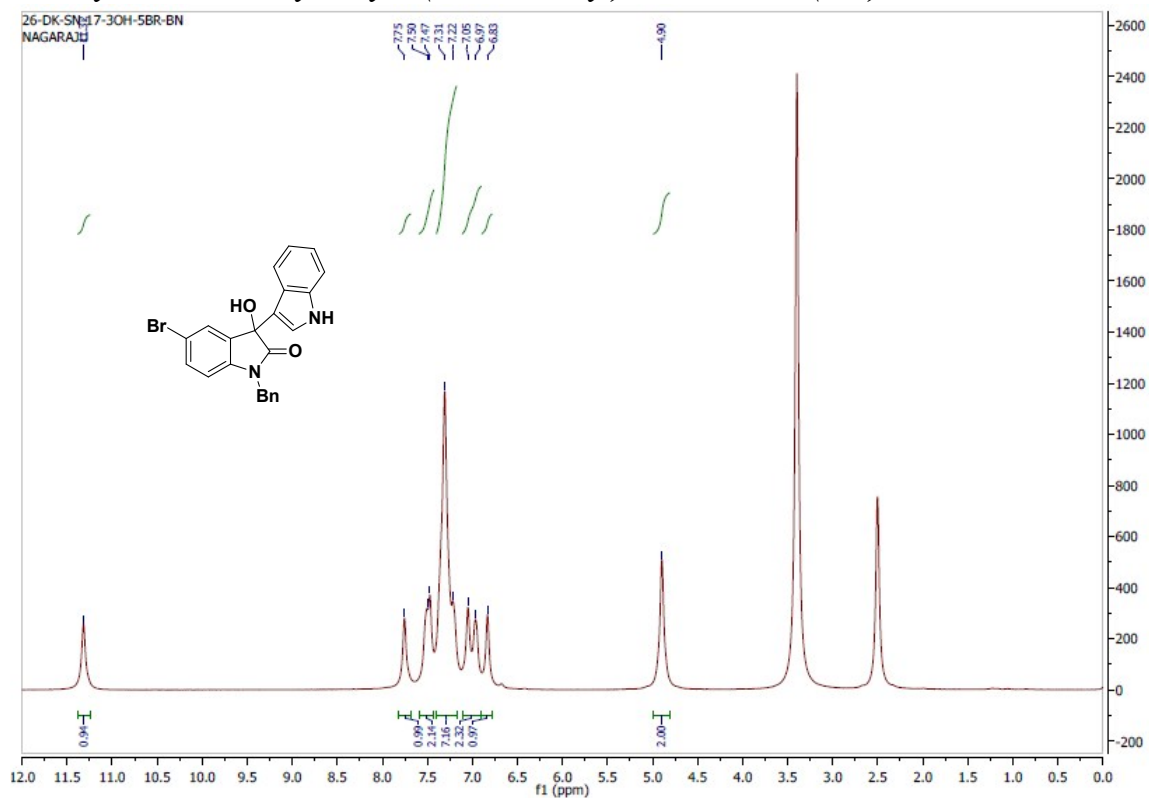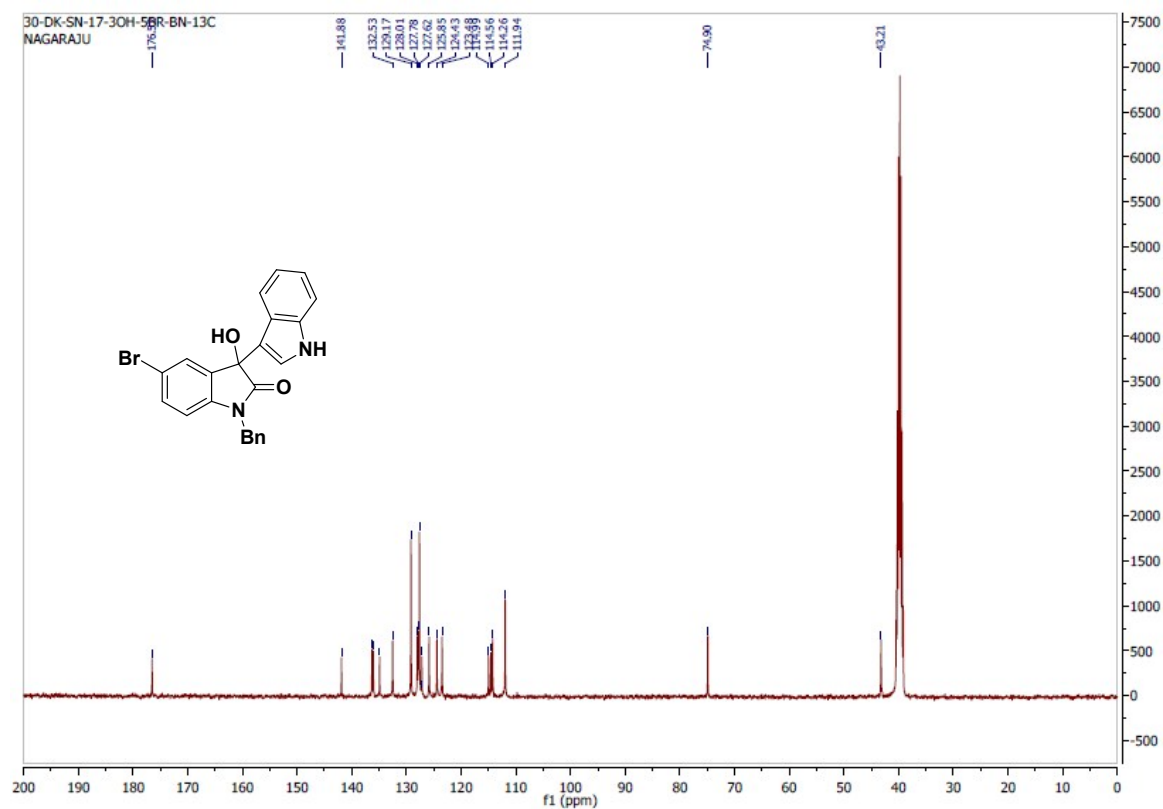

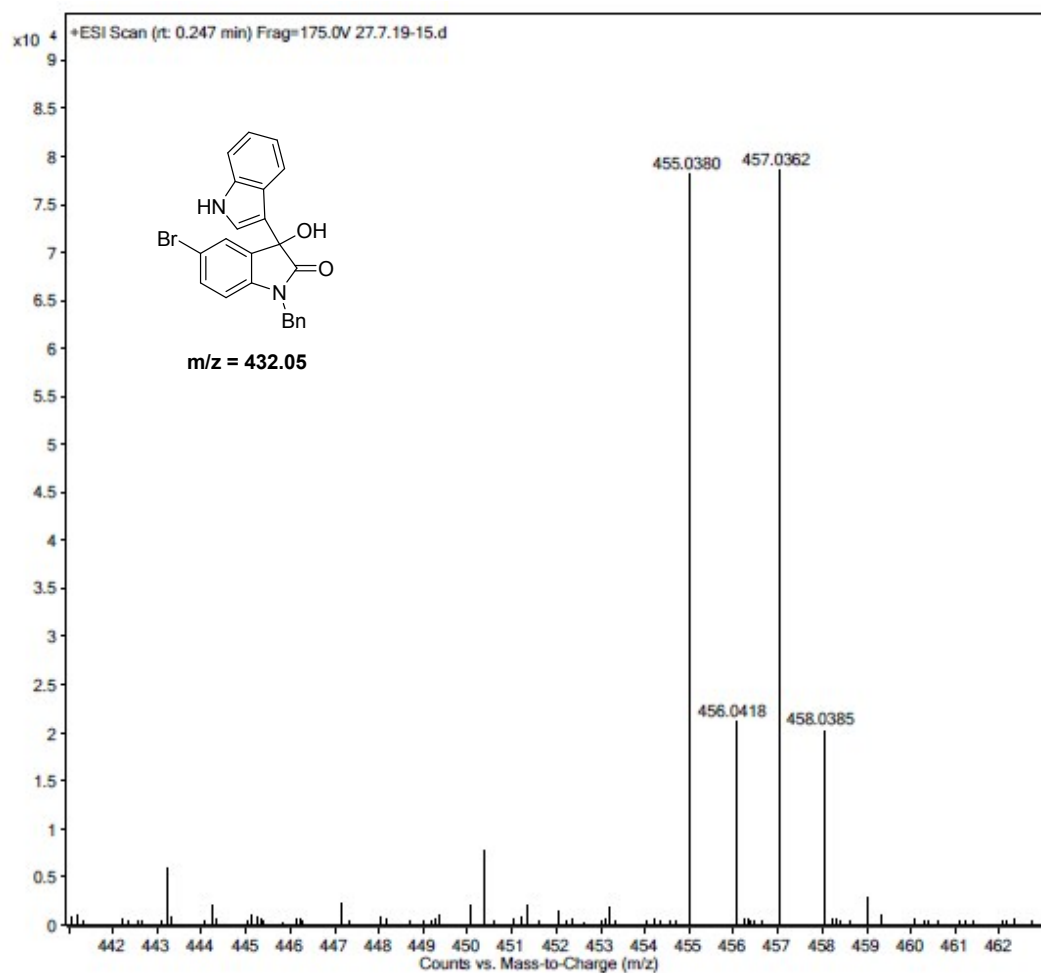

**1-benzyl-3-(5-bromo-1H-indol-3-yl)-3-hydroxyindolin-2-one (15p):**

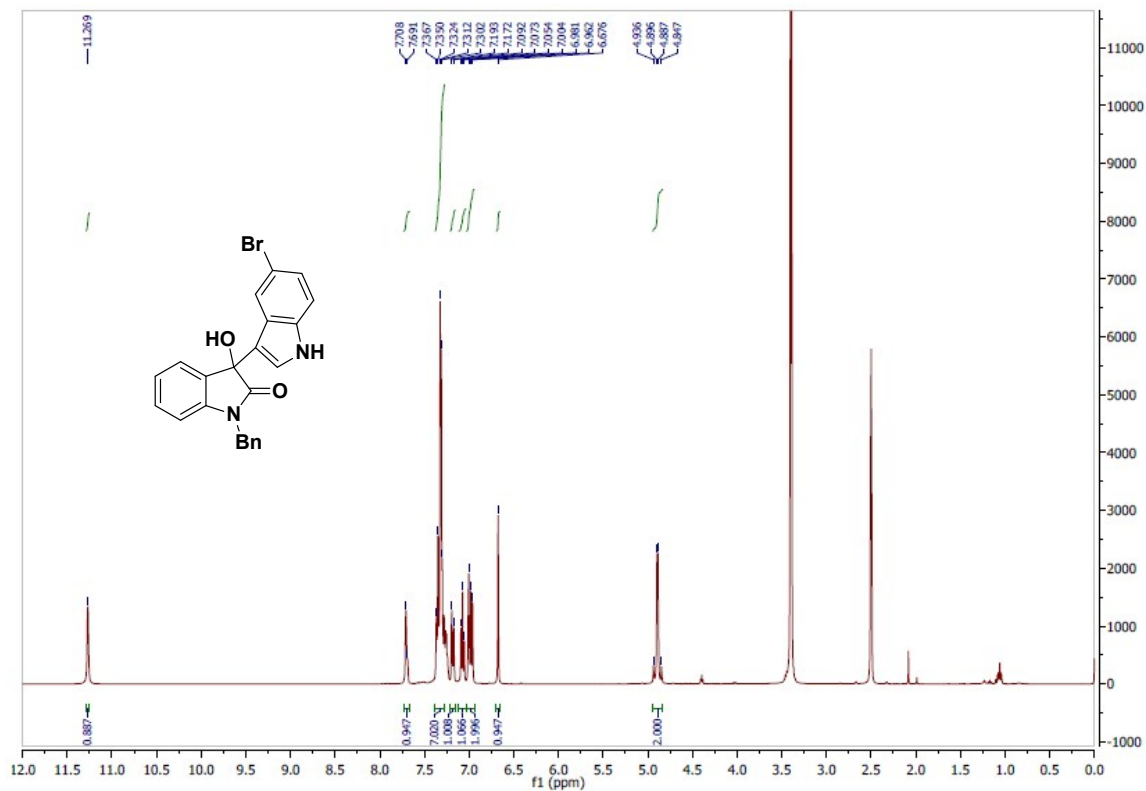

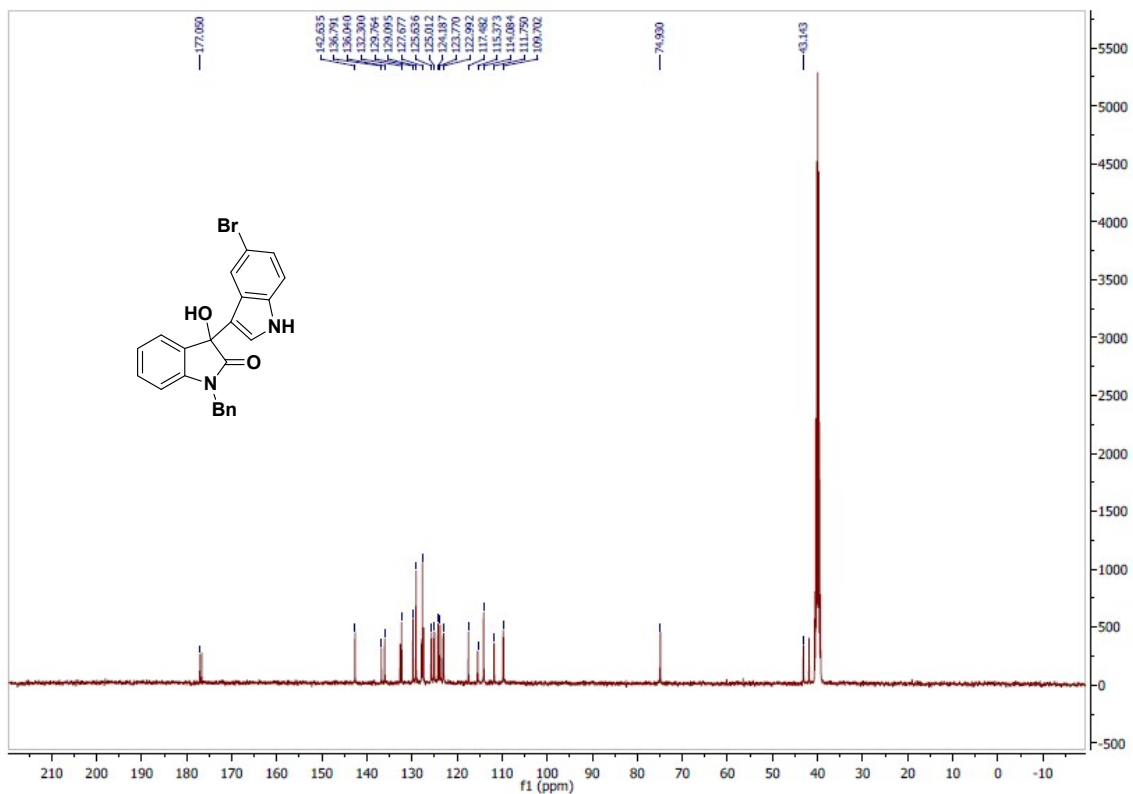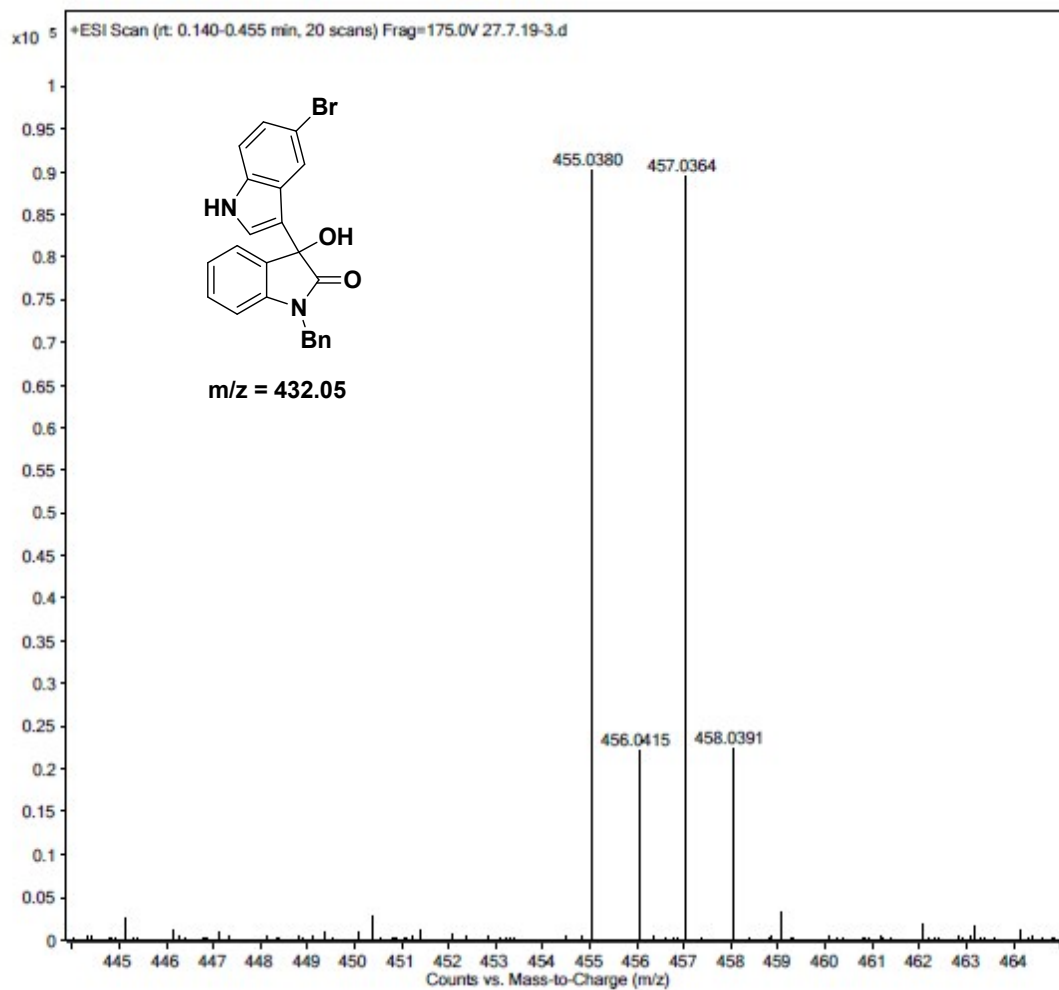

**1-benzyl-5-bromo-3-hydroxy-3-(1H-indol-3-yl)indolin-2-one (15q):**

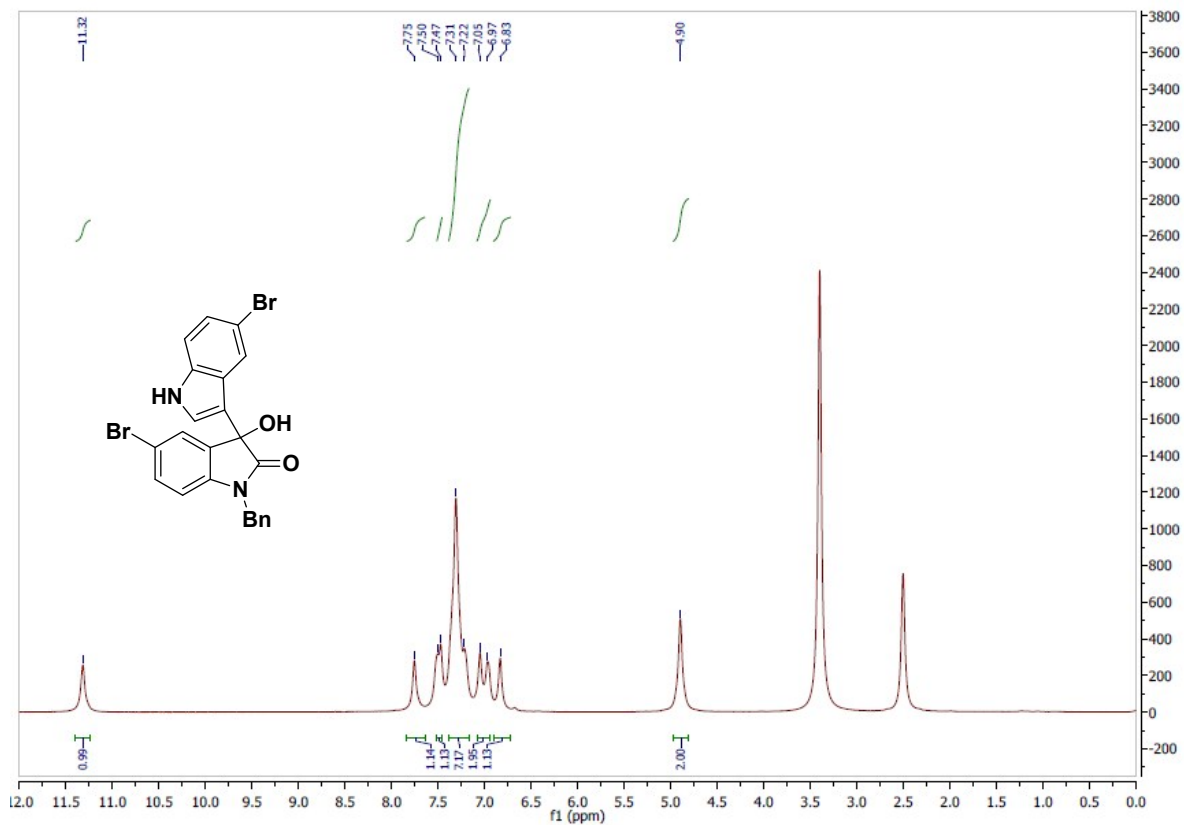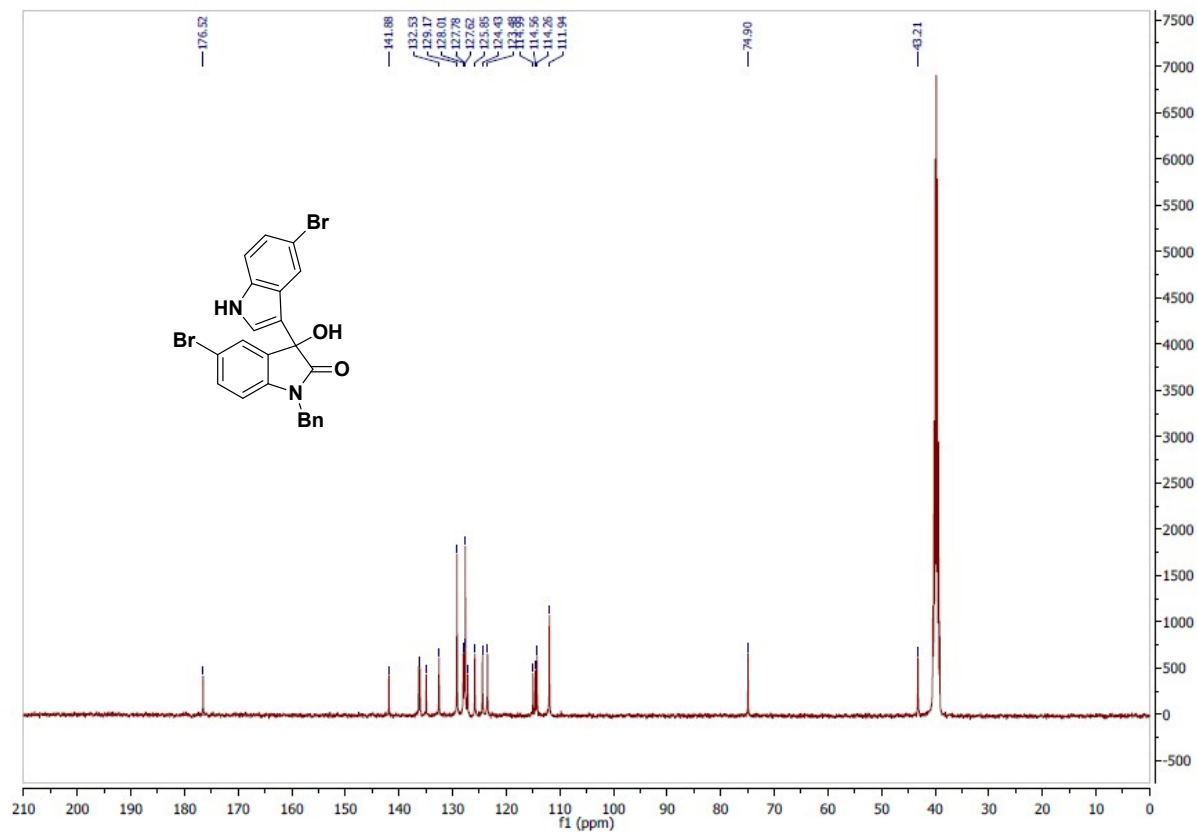

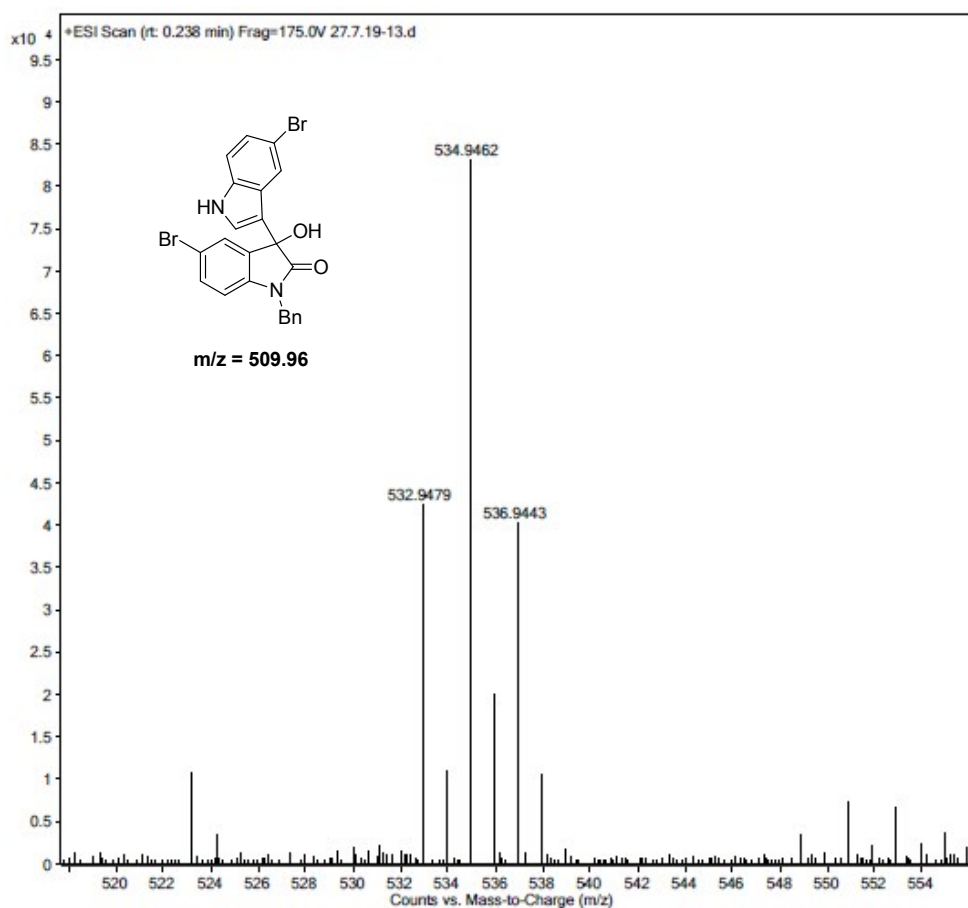

***1-allyl-3-hydroxy-3-(1H-indol-3-yl)indolin-2-one (15r):***

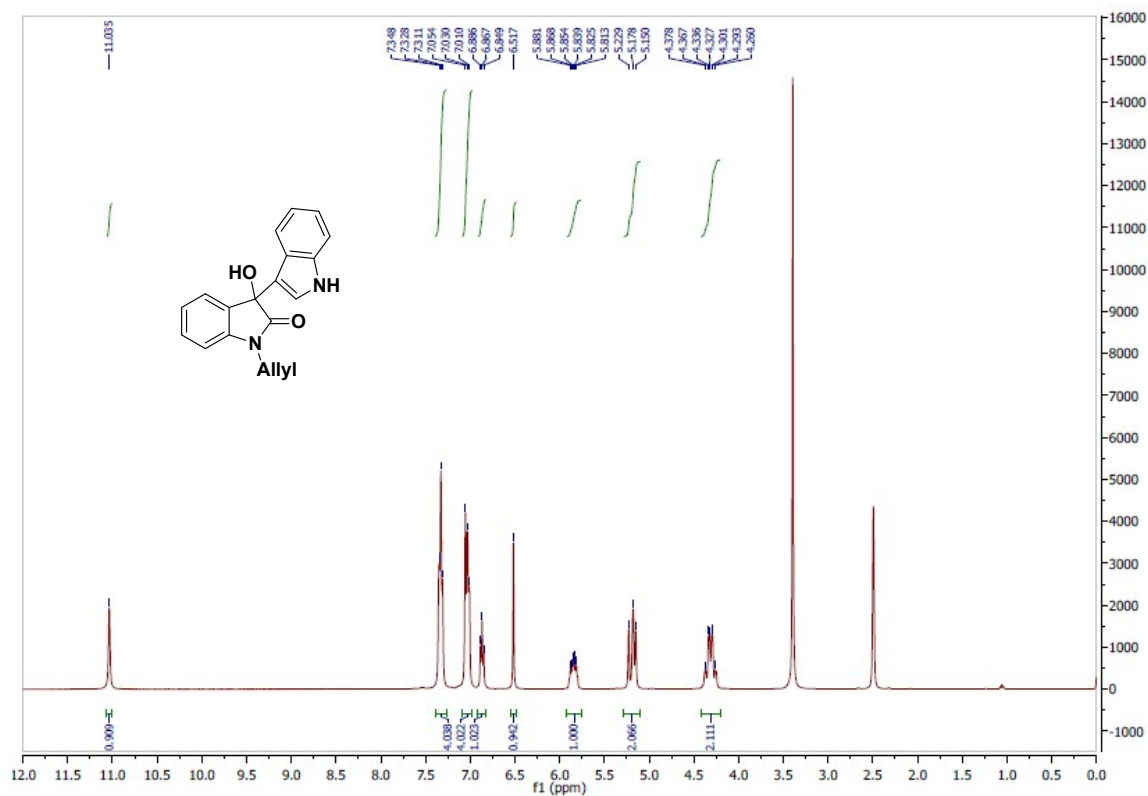

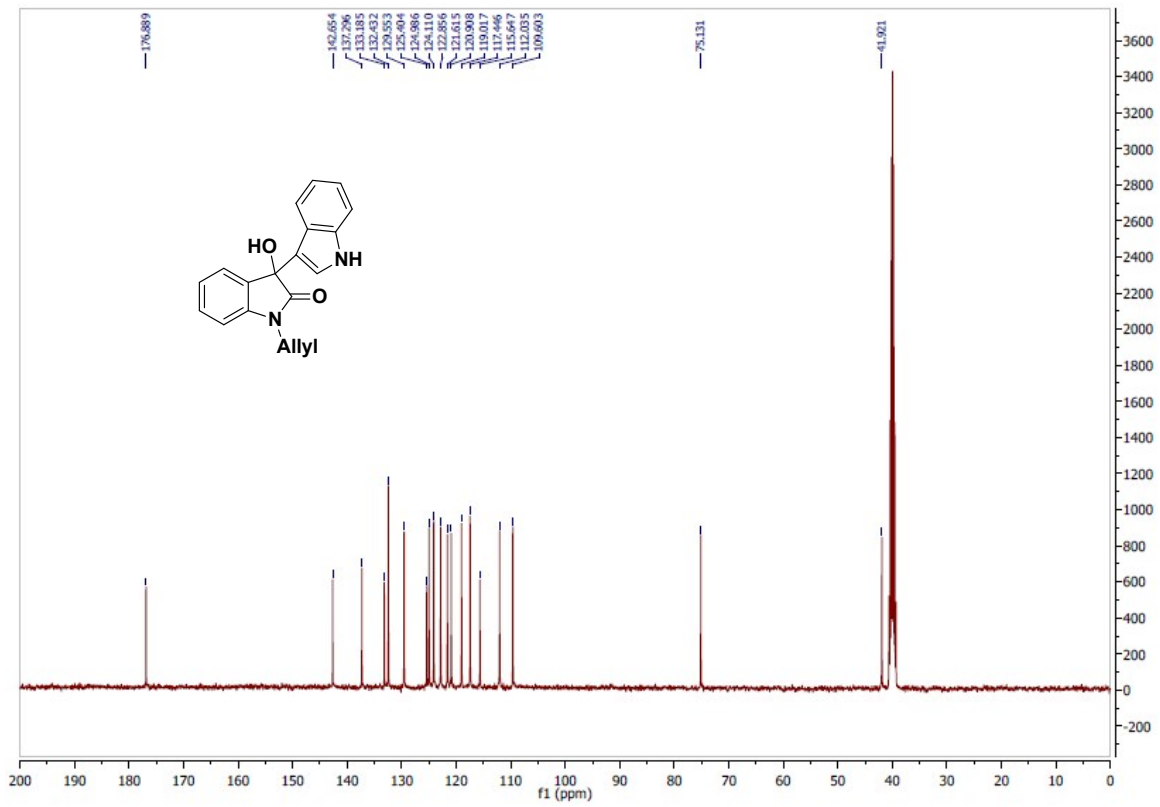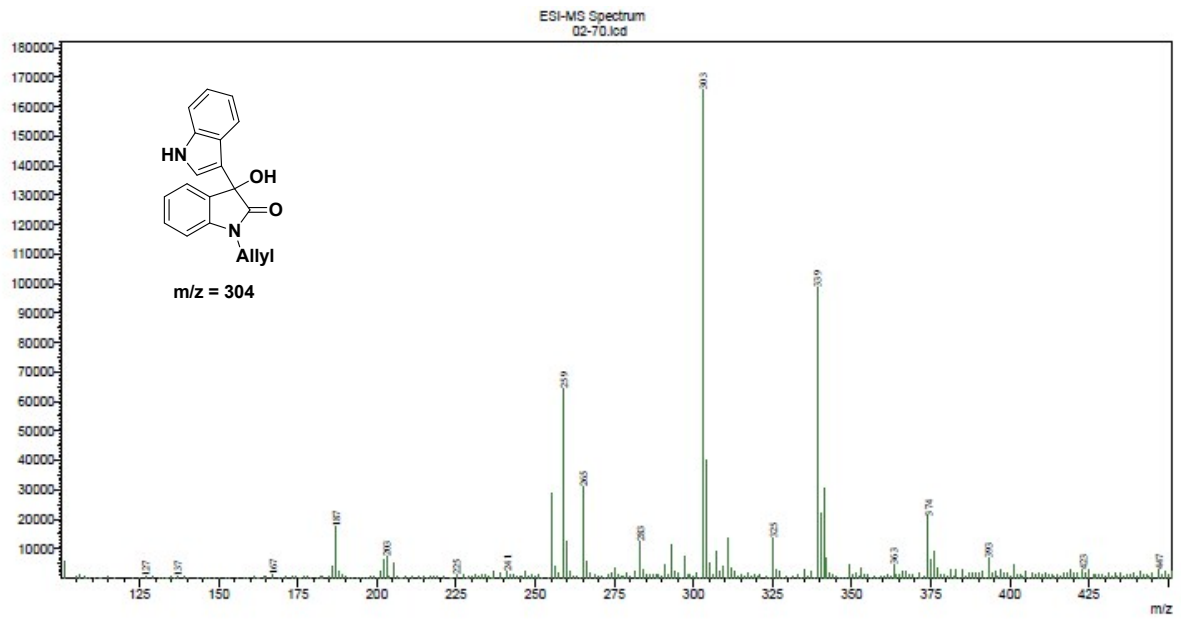

**1-allyl-3-(5-bromo-1H-indol-3-yl)-3-hydroxyindolin-2-one (15t):**

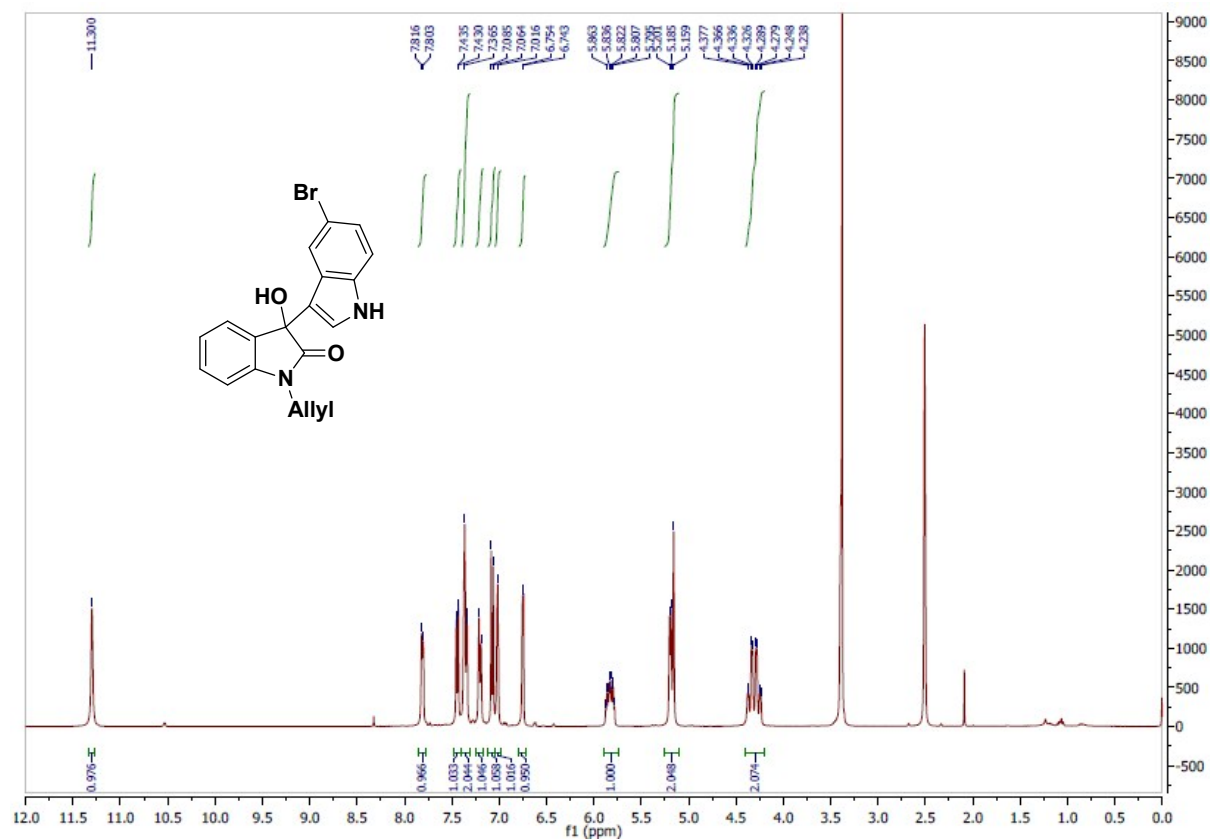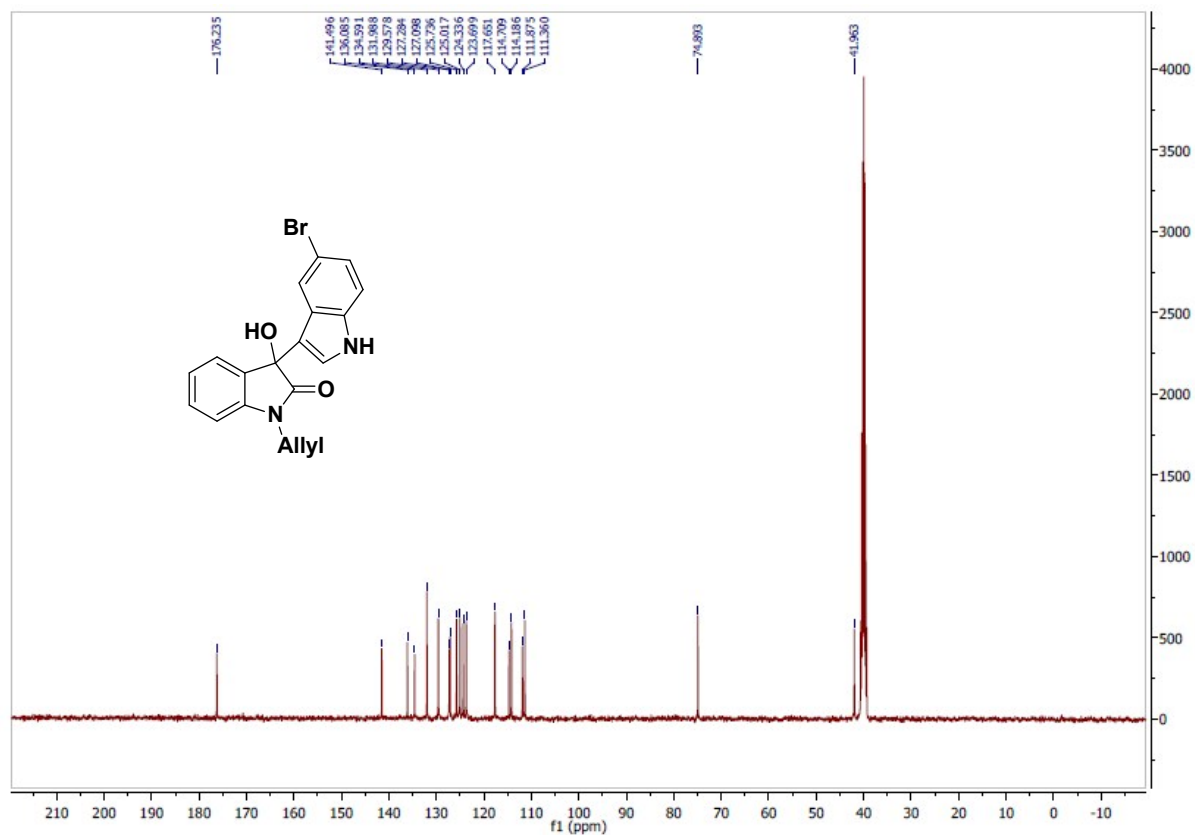



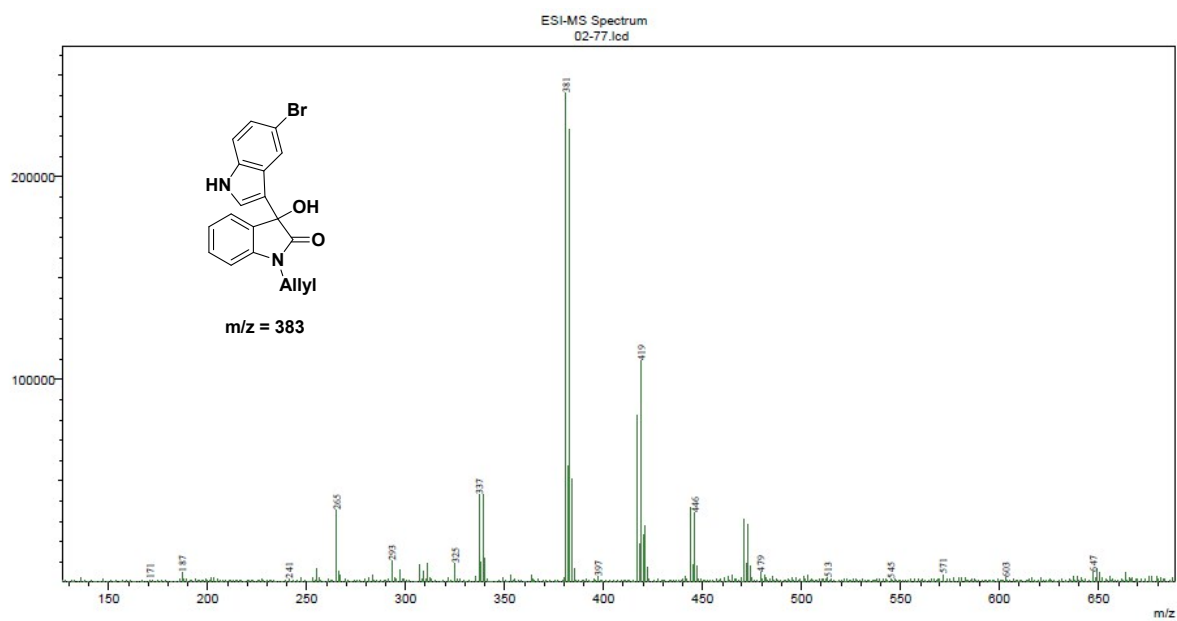

***1-allyl-3-(5-bromo-1H-indol-3-yl)-5-chloro-3-hydroxyindolin-2-one (15u):***

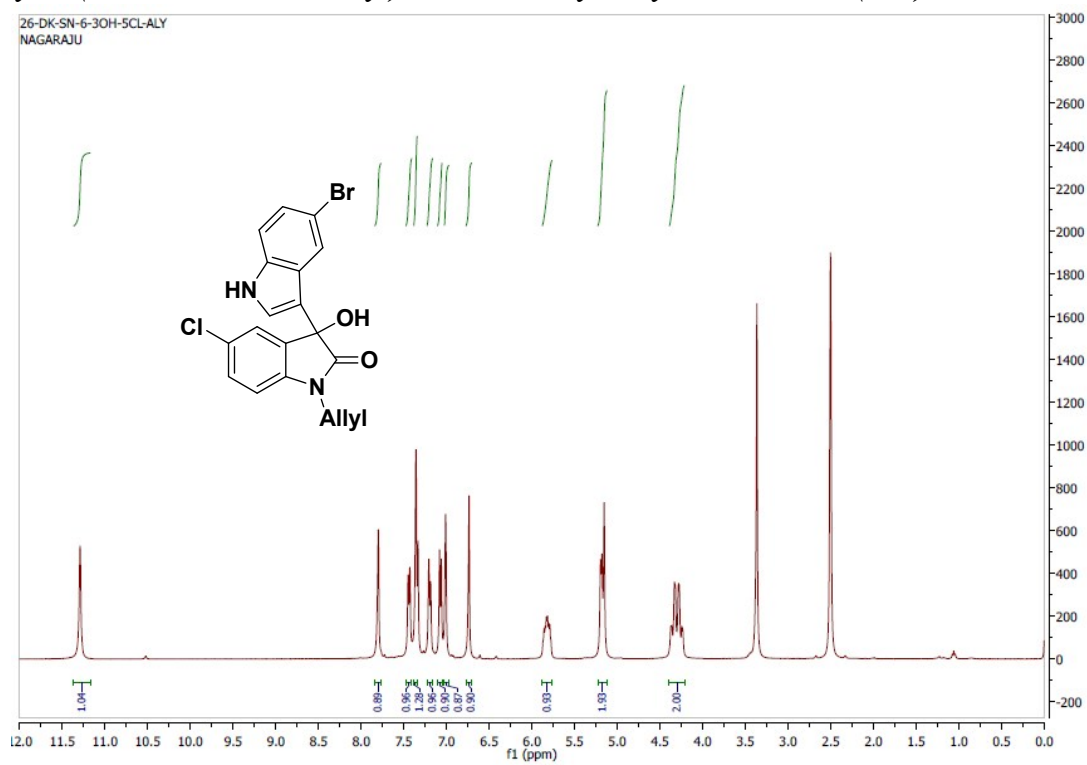

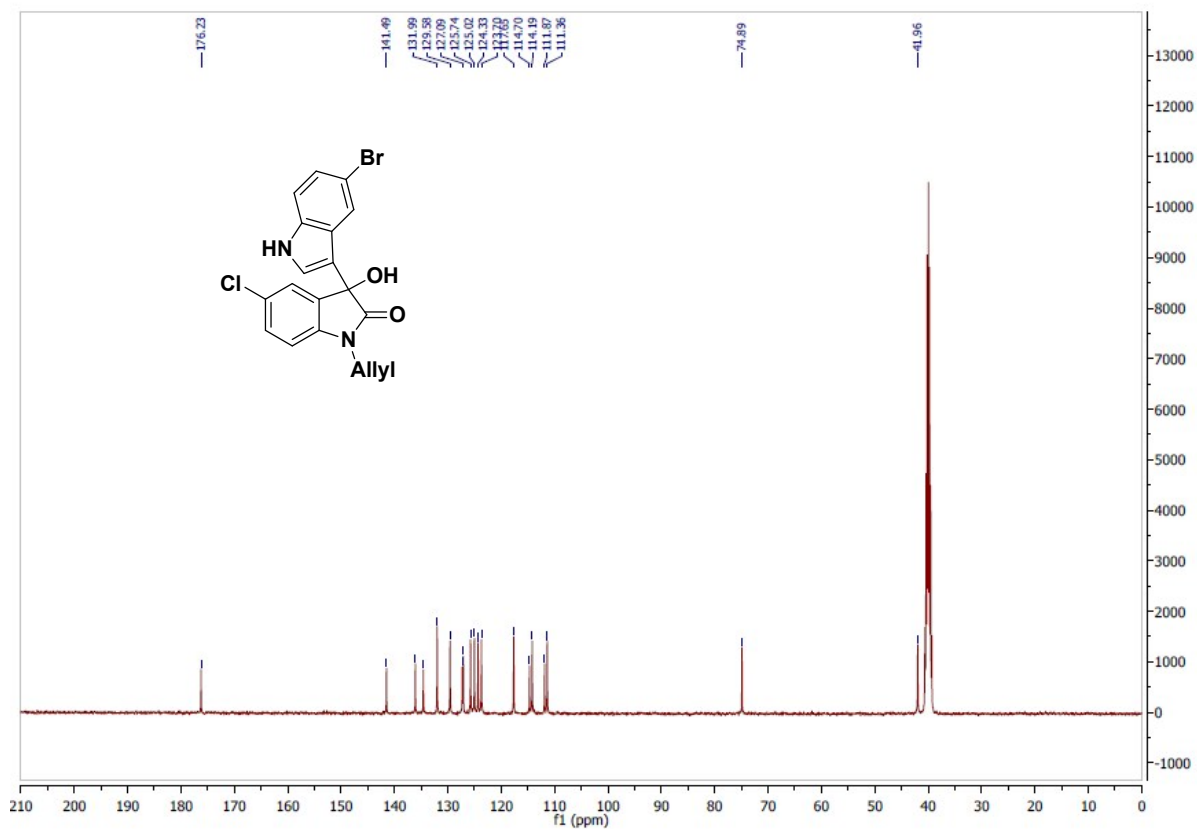

**1-allyl-5-bromo-3-hydroxy-3-(1H-indol-3-yl)indolin-2-one (15v):**

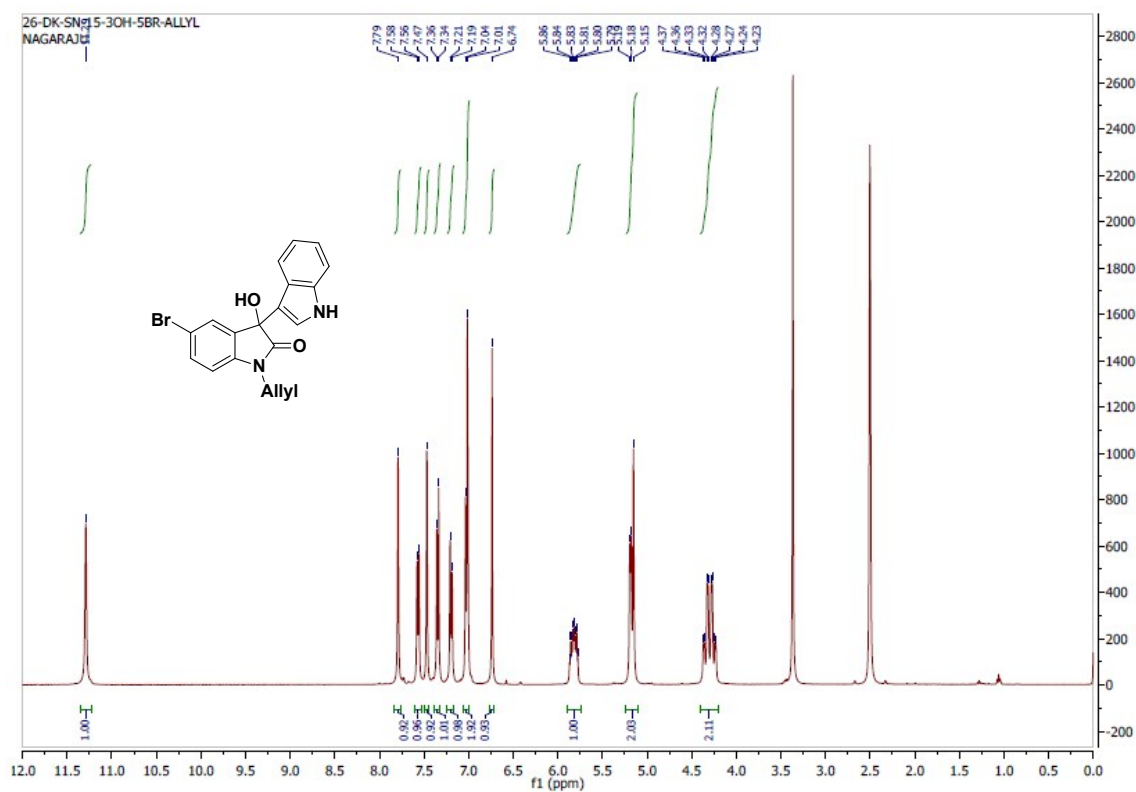

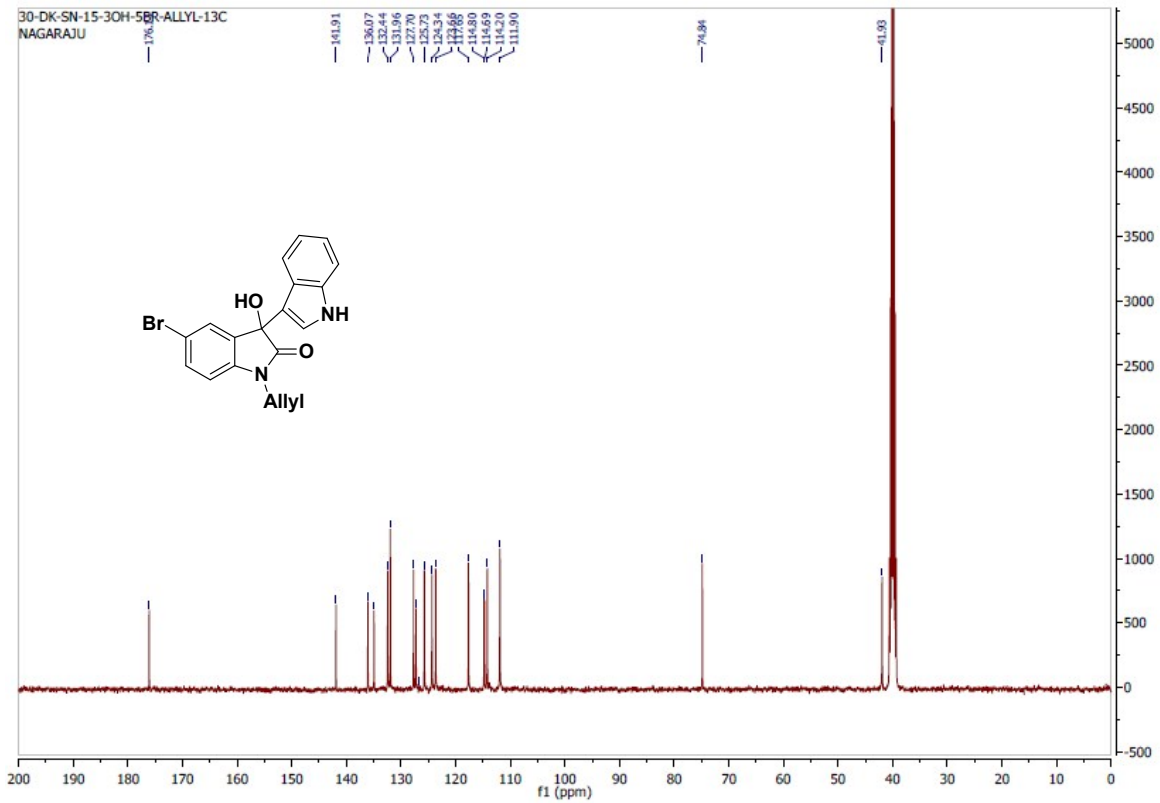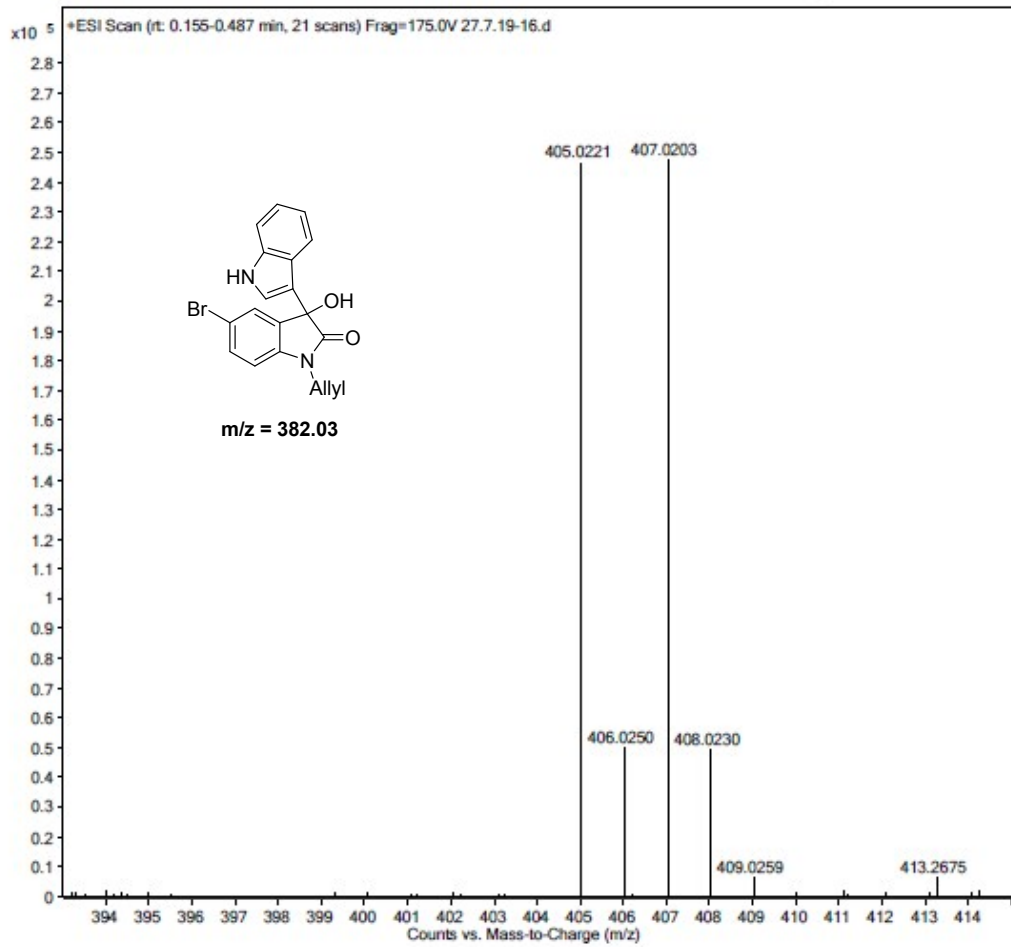

**1-allyl-5-bromo-3-(5-bromo-1H-indol-3-yl)-3-hydroxyindolin-2-one (15w):**

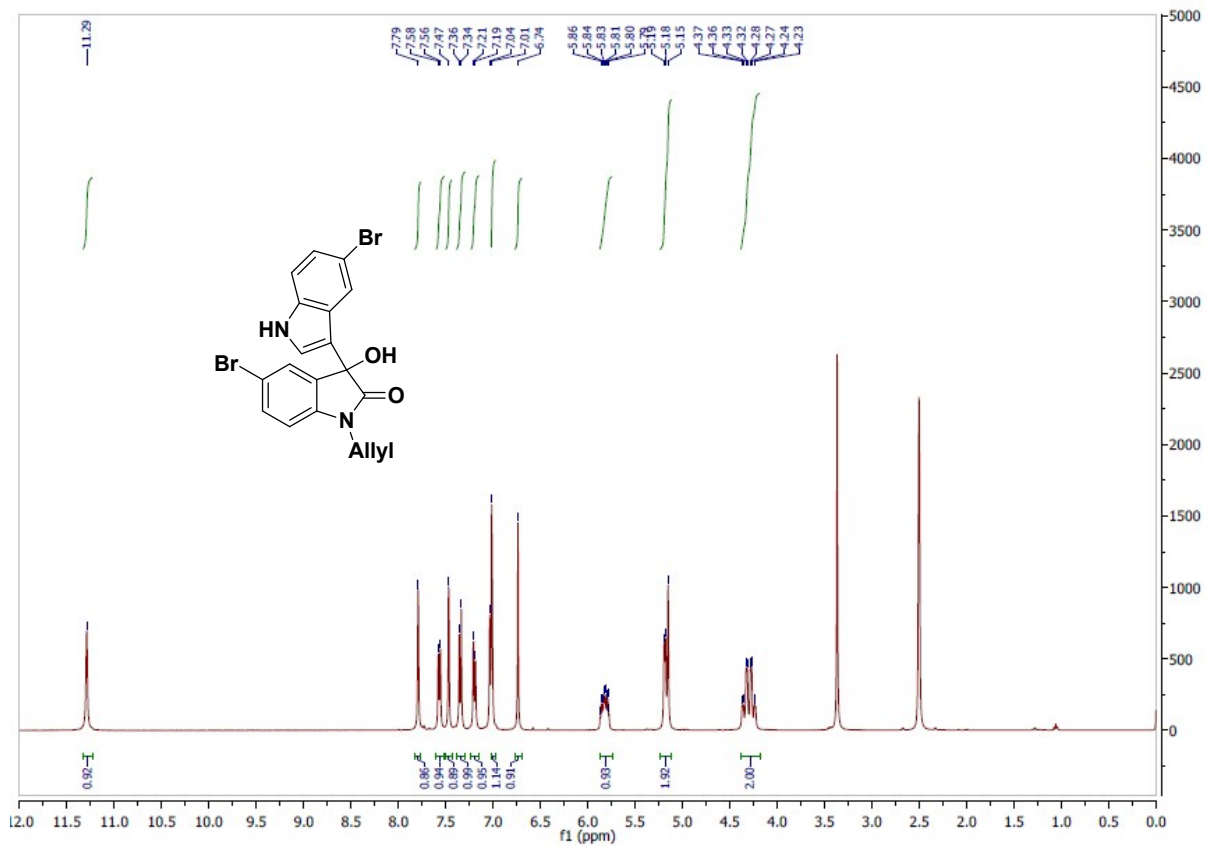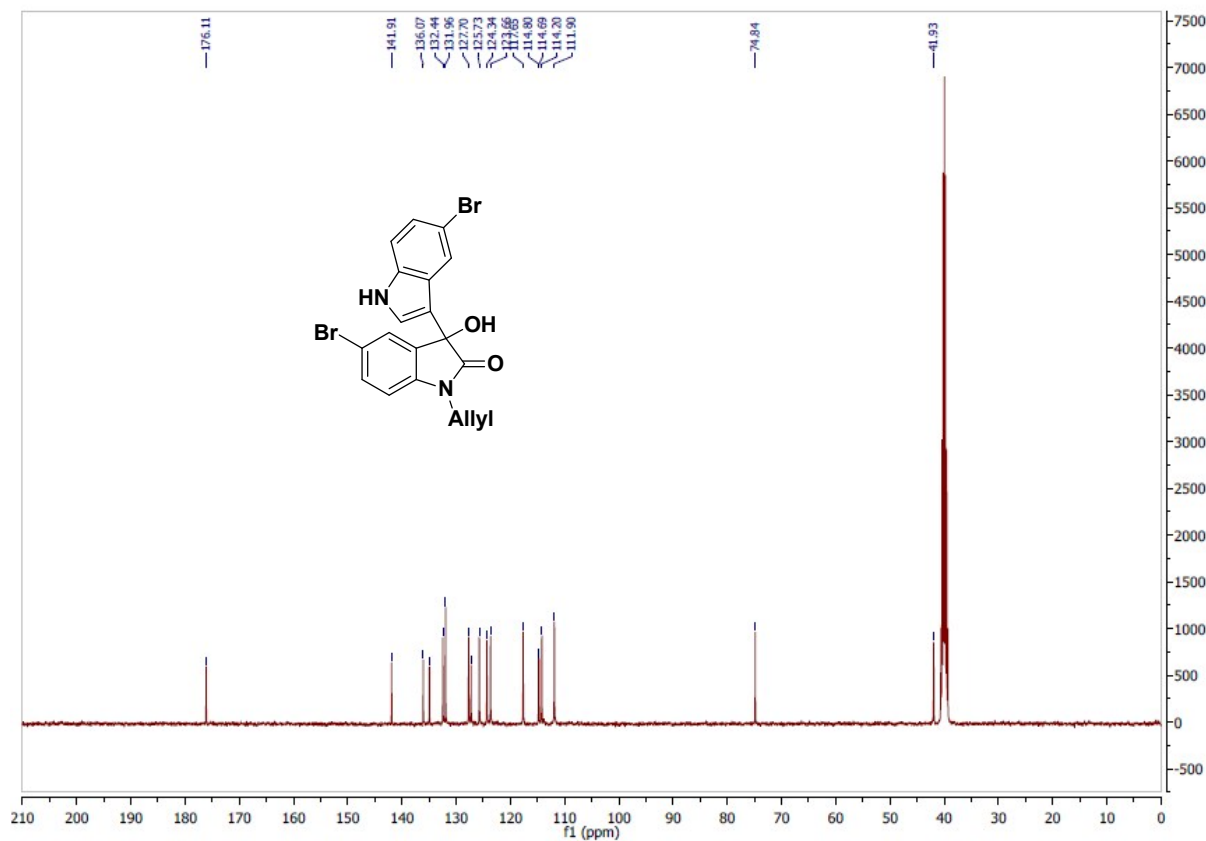

**Ethyl 2-(3-hydroxy-3-(1H-indol-3-yl)-2-oxindolin-1-yl)acetate (15x):**

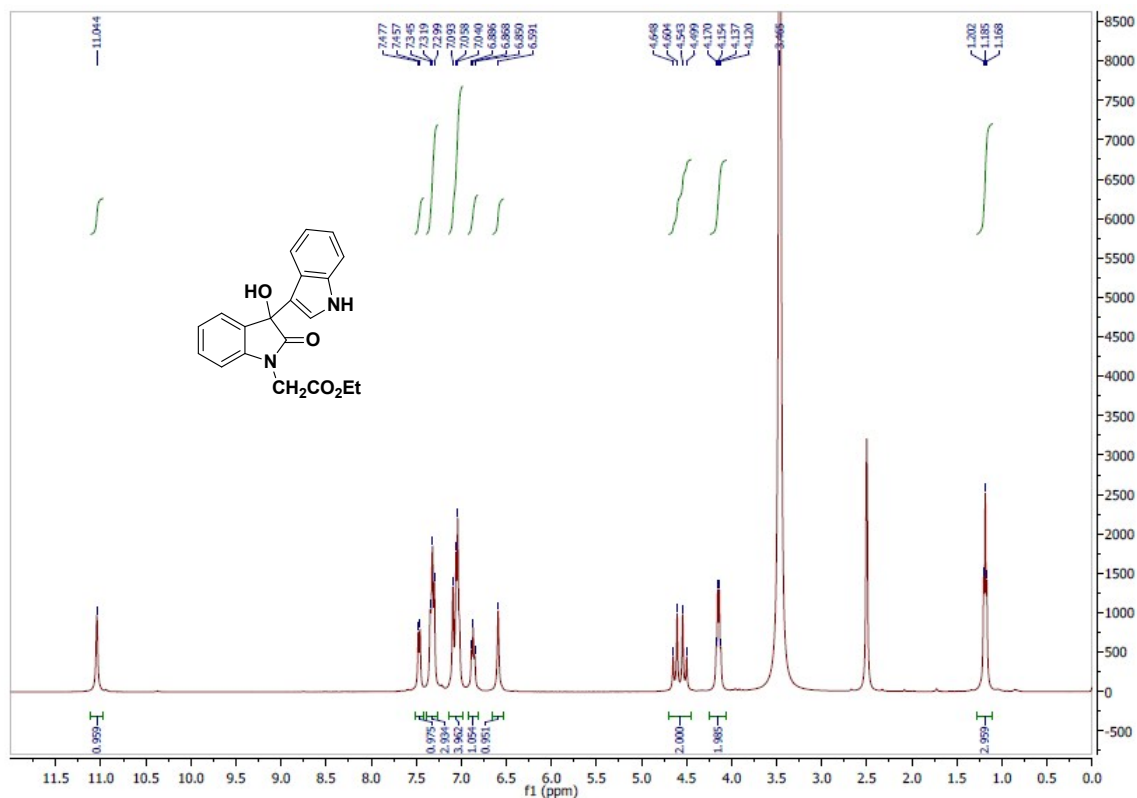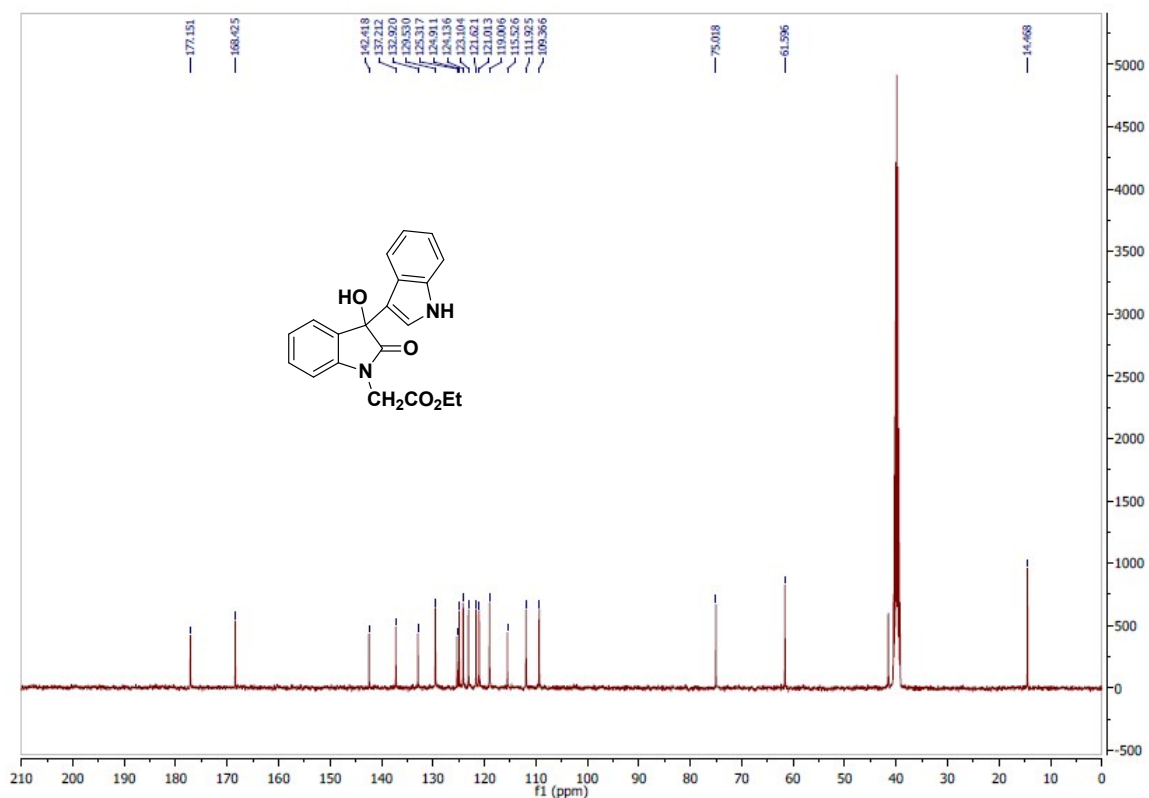

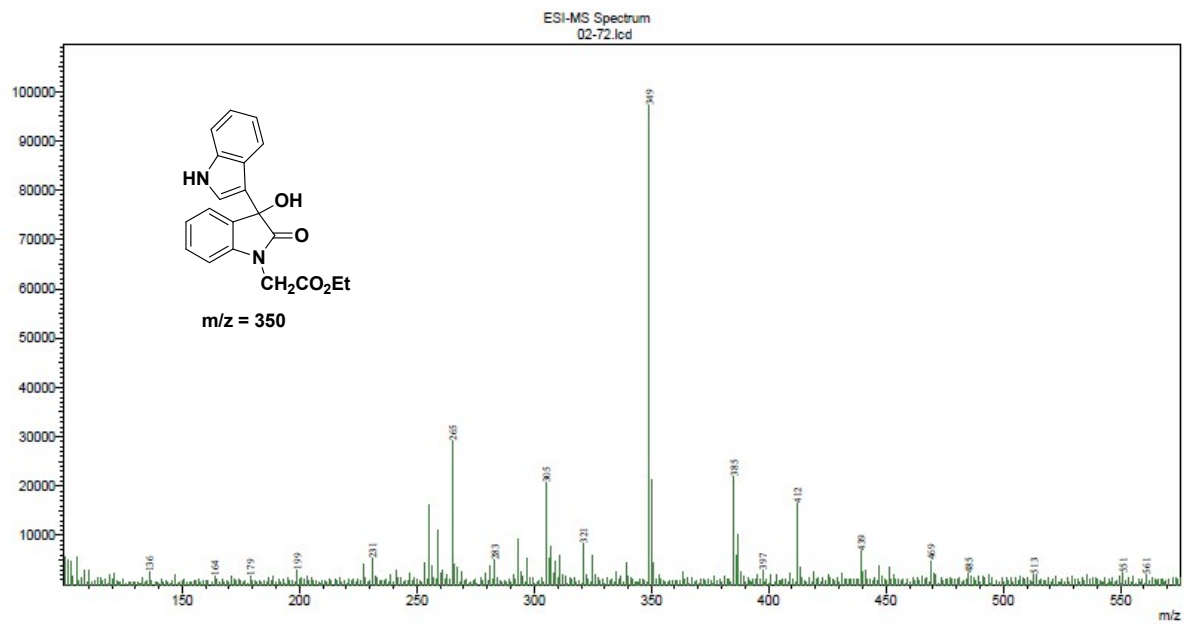

***Ethyl 2-(5-chloro-3-hydroxy-3-(1H-indol-3-yl)-2-oxindolin-1-yl)acetate (15y):***

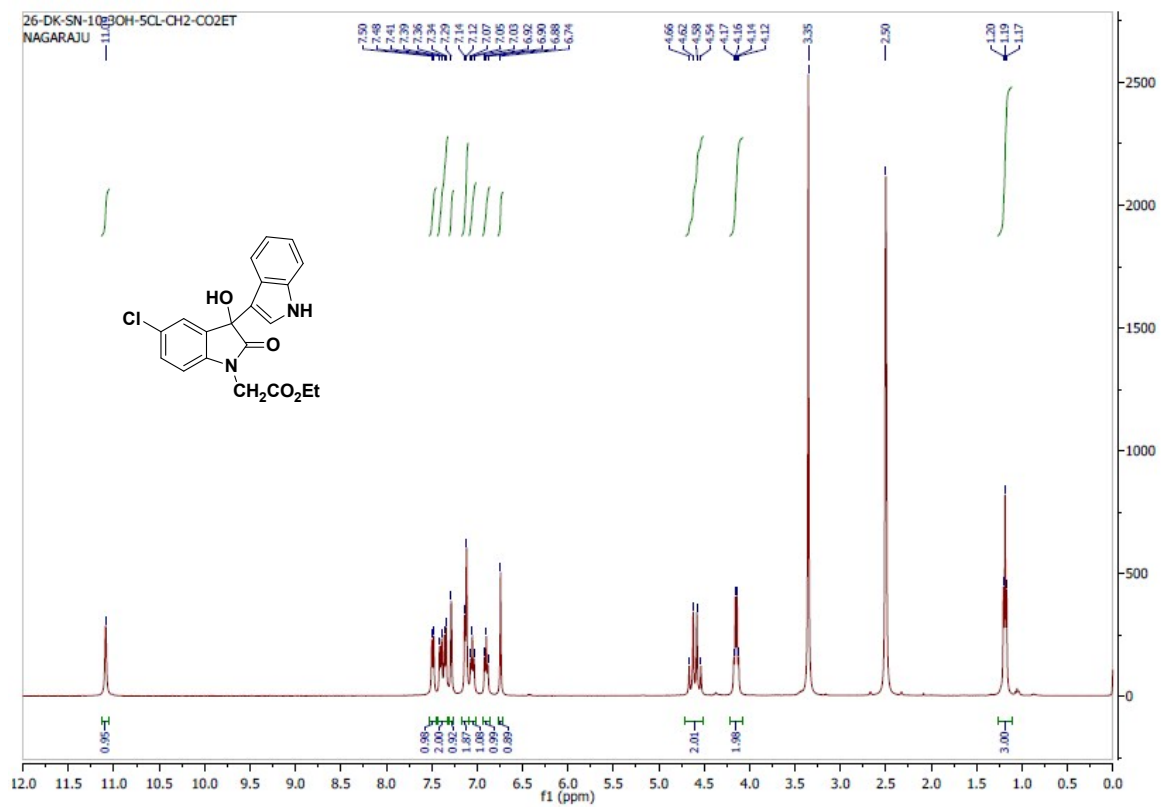

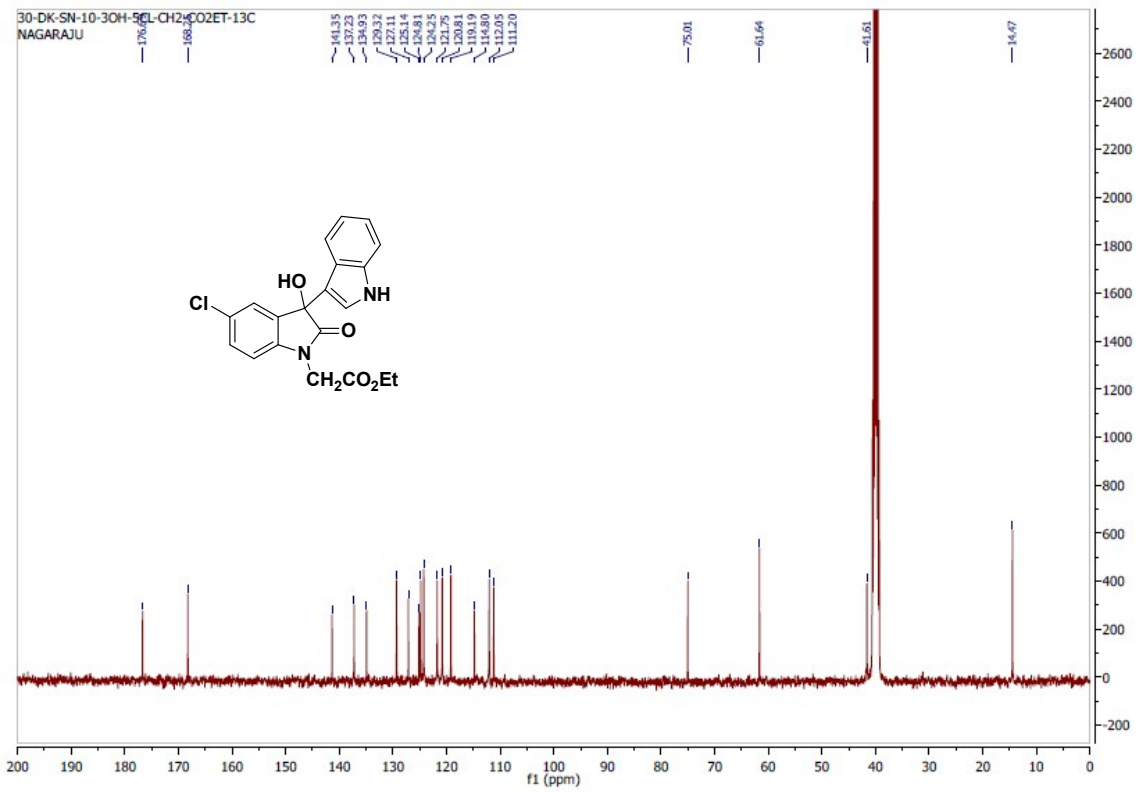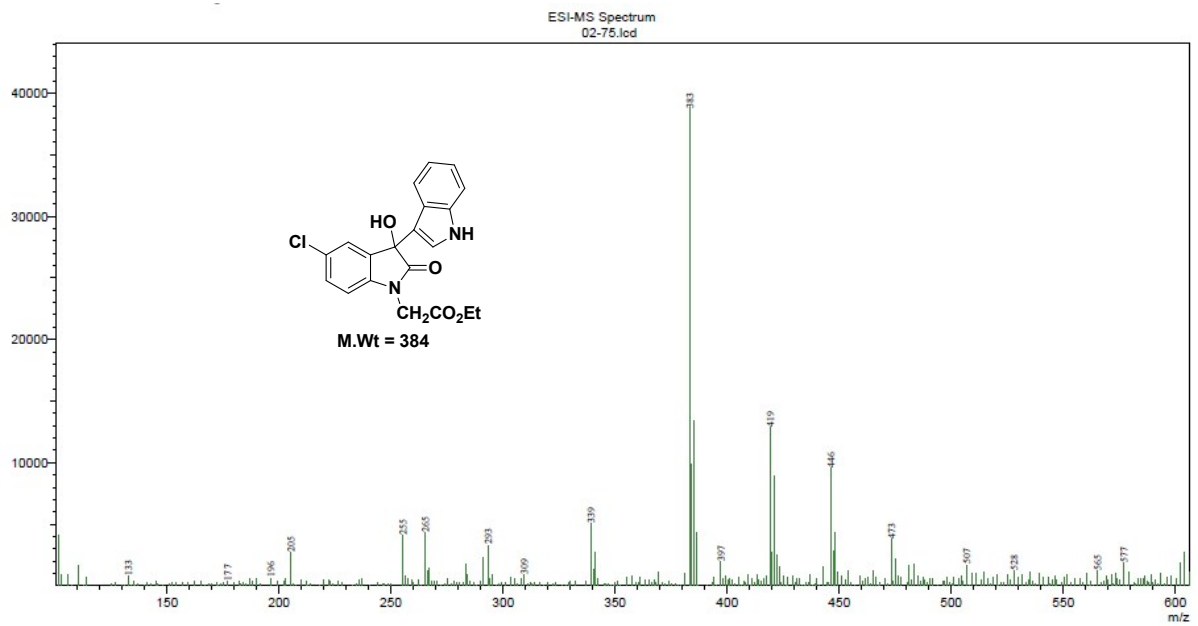

**1,1'-(hexane-1,6-diyl)bis(3-(5-bromo-1H-indol-3-yl)-3-hydroxyindolin-2-one) (15z):**

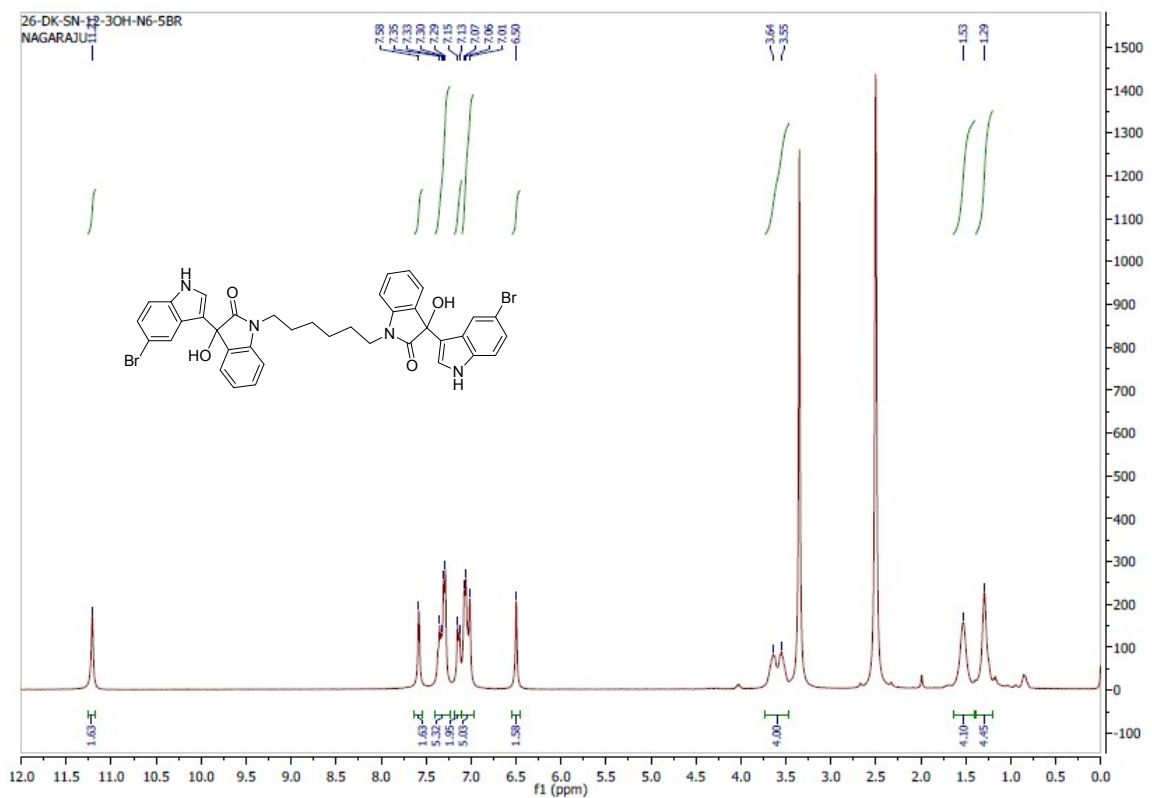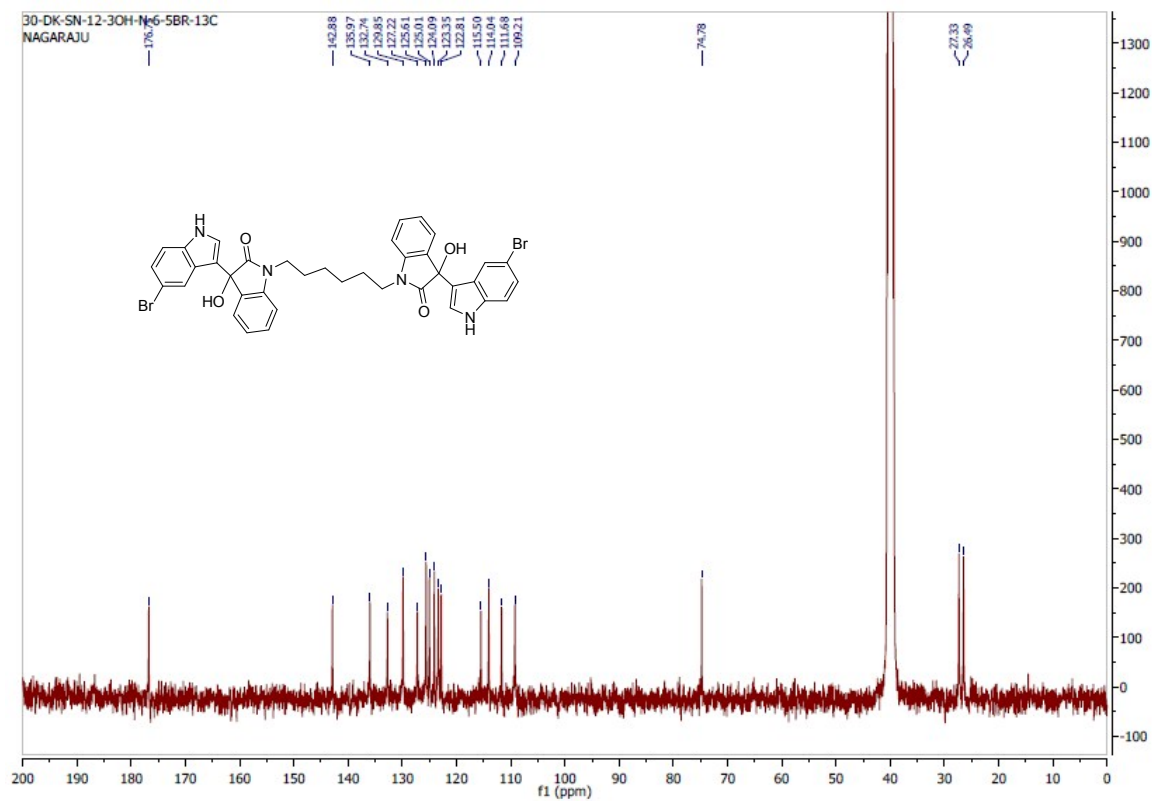



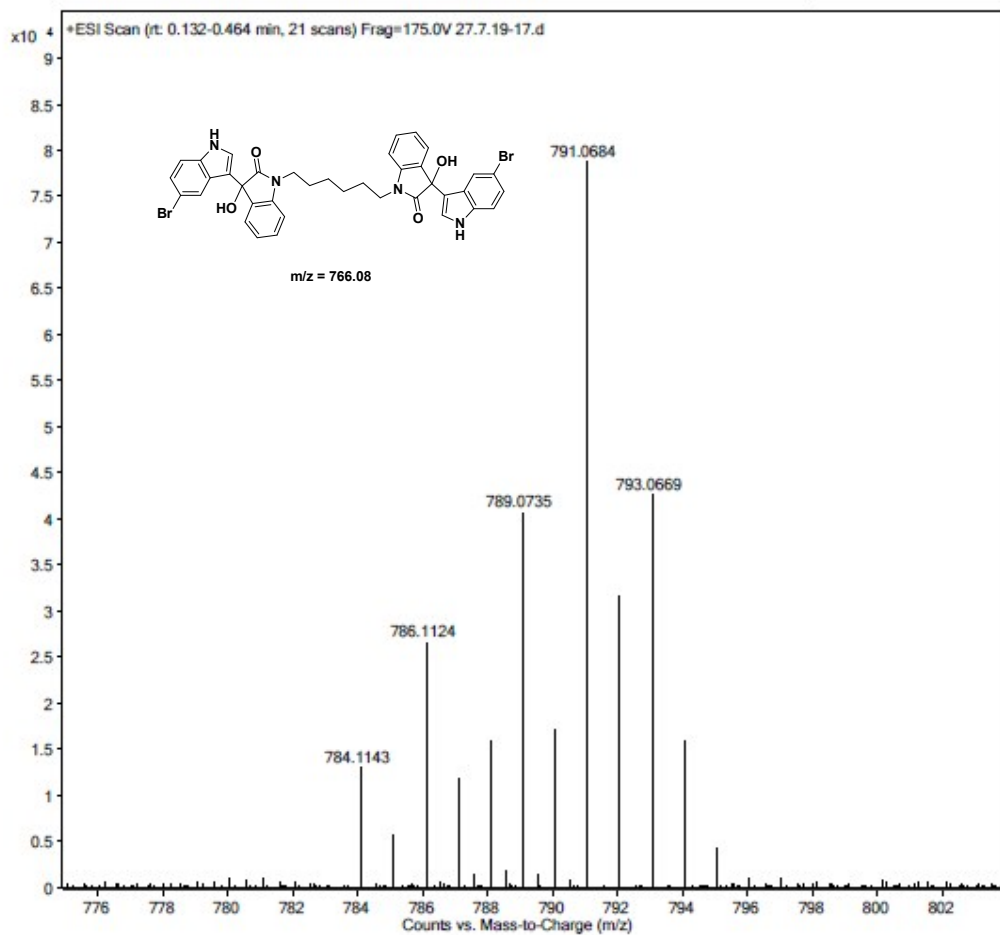

*[3,3':3',3''-terindolin]-2'-one (16b)*

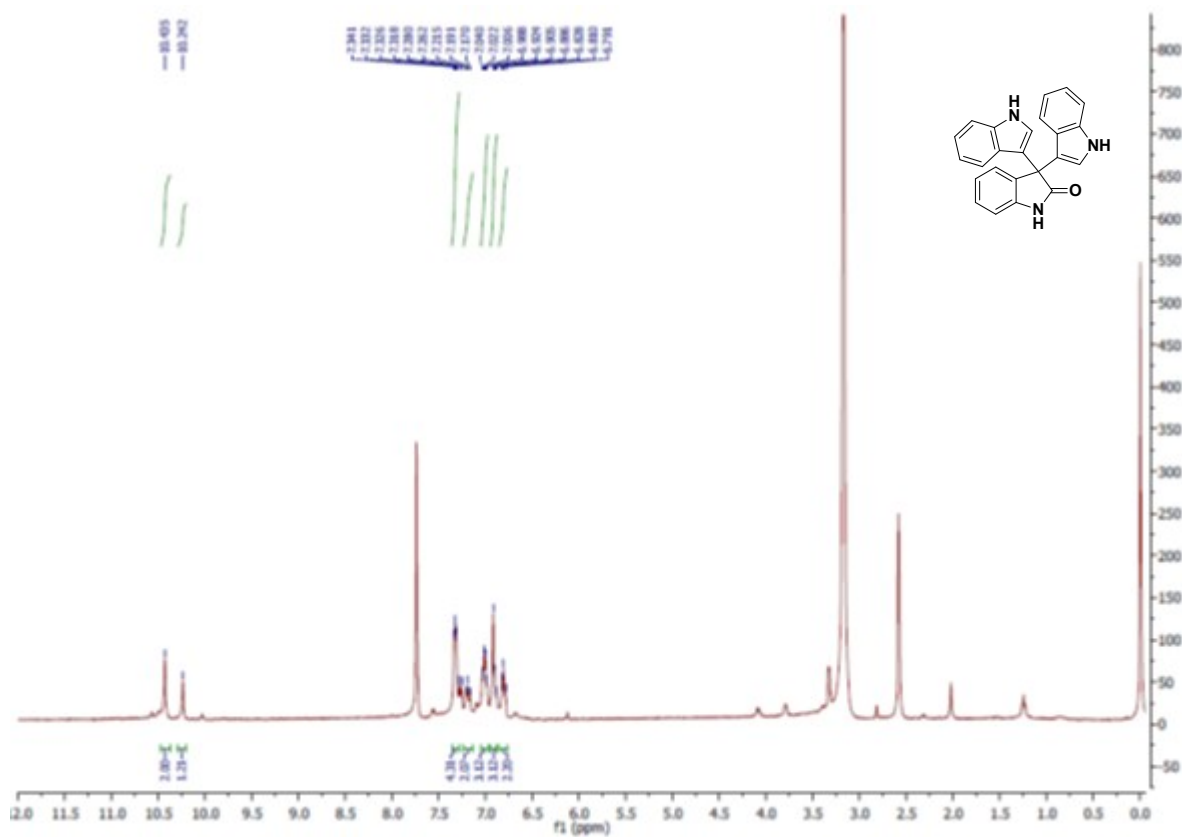

**1'-methyl-1H,1''H-[3,3':3',3''-terbenzo[b]pyrrol]-2'(1'H)-one (16c):**

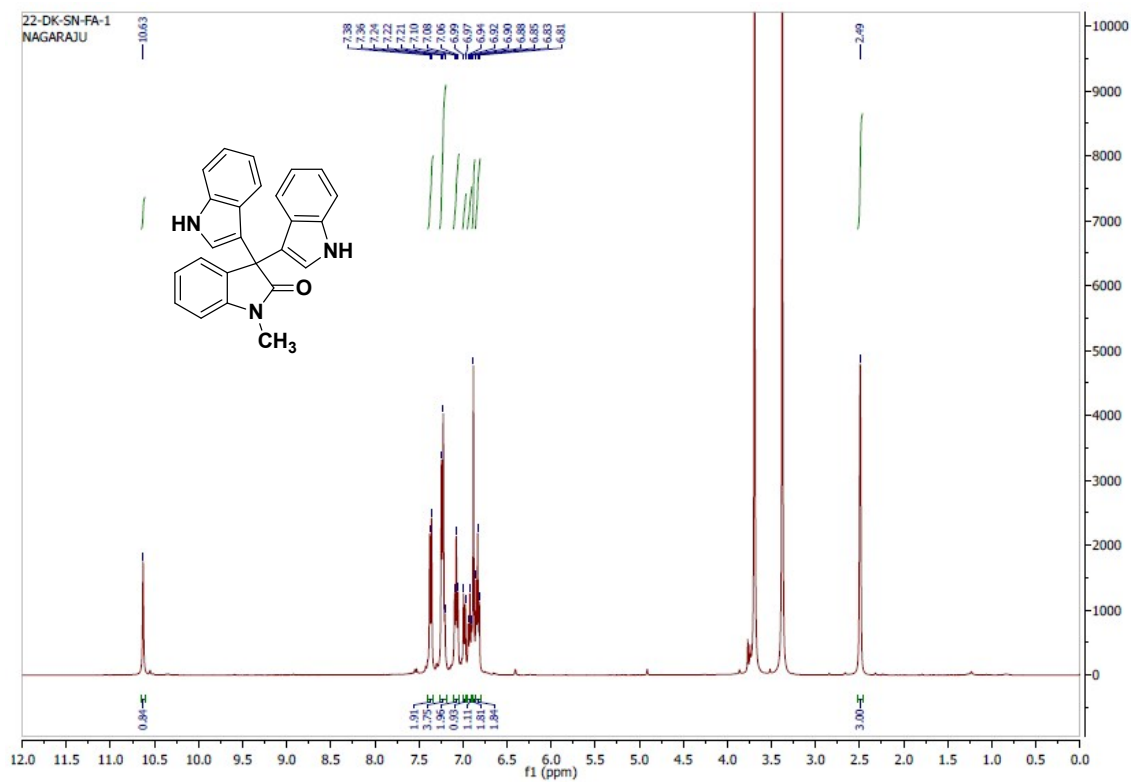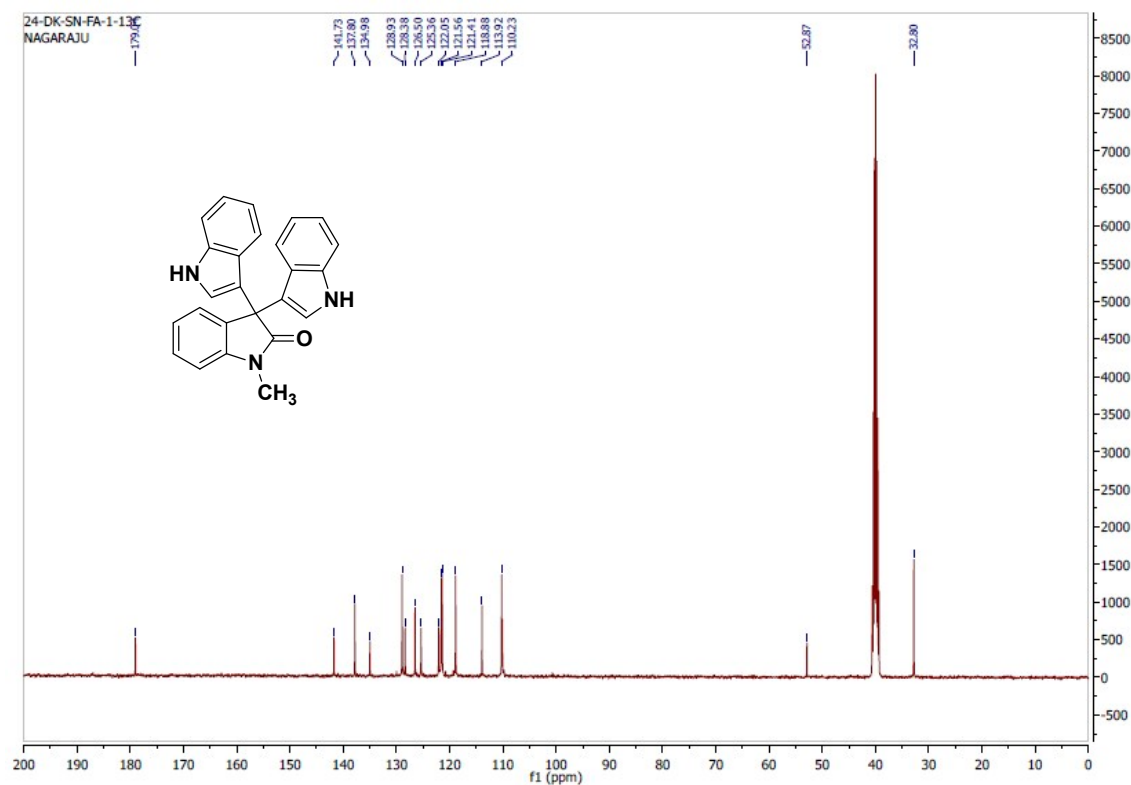

**1'-ethyl-1H,1''H-[3,3':3',3''-terbenzo[b]pyrrol]-2'(1'H)-one (16d):**

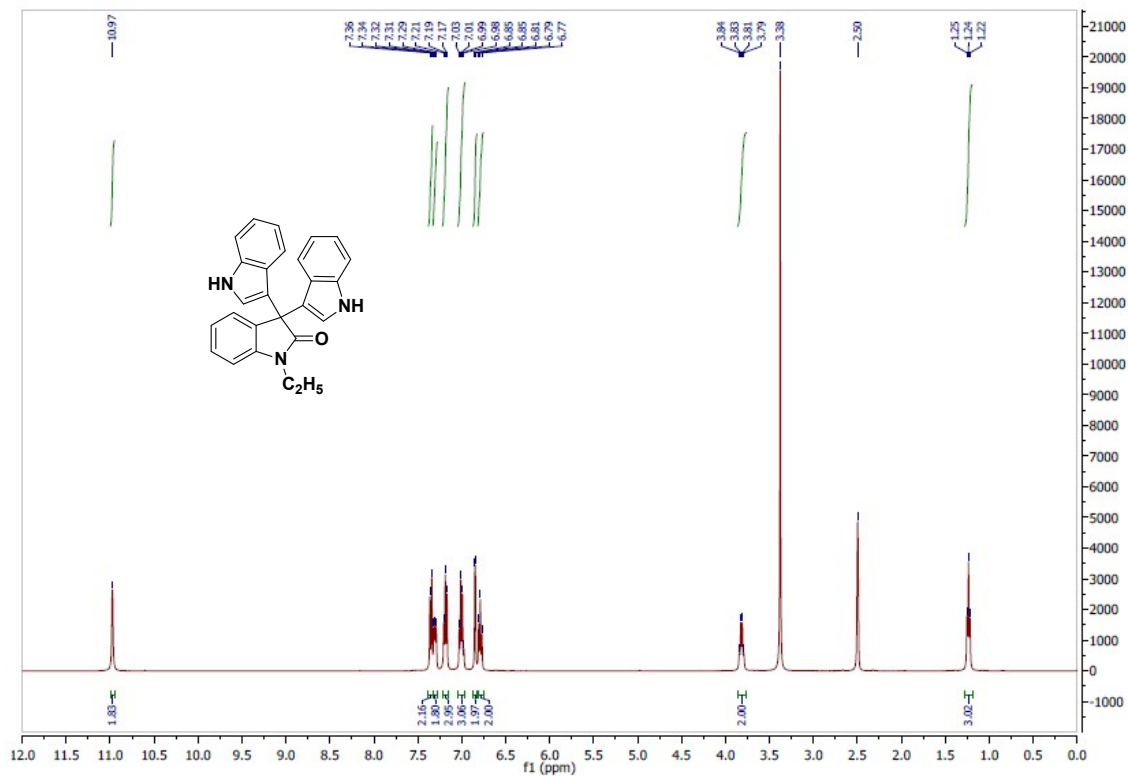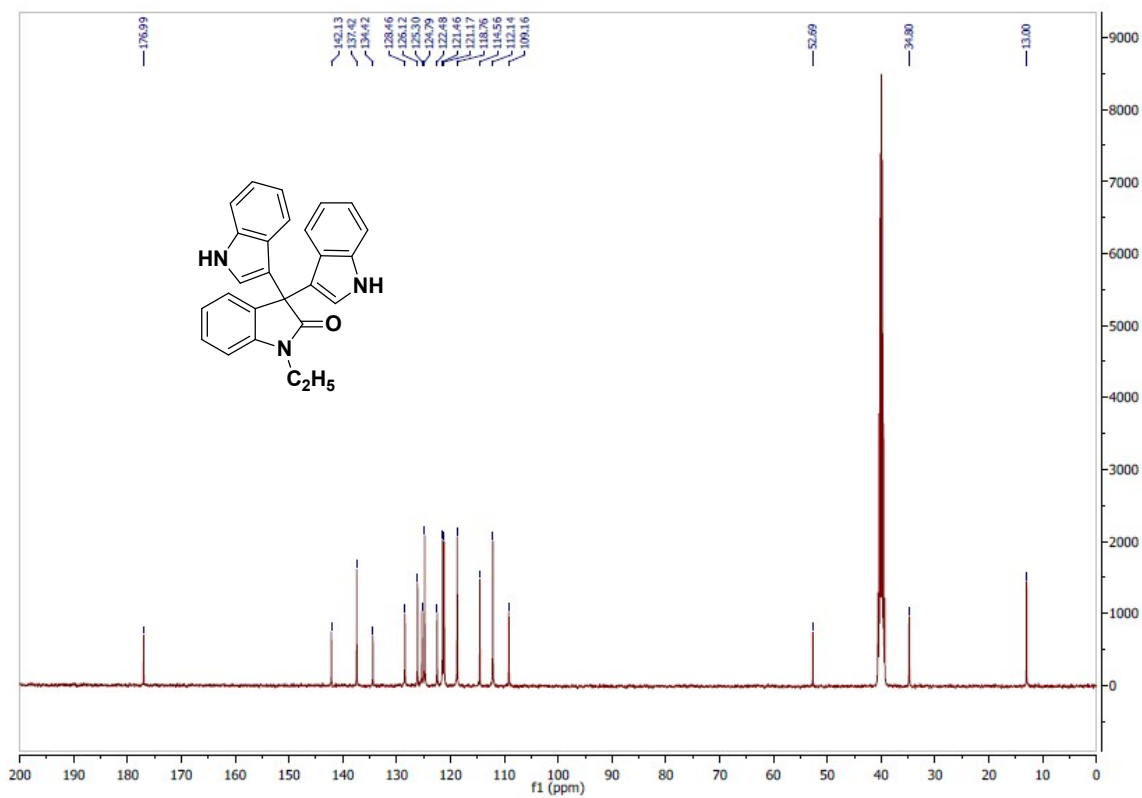

*1'-benzyl-[3,3':3',3''-terindolin]-2'-one(16e)*

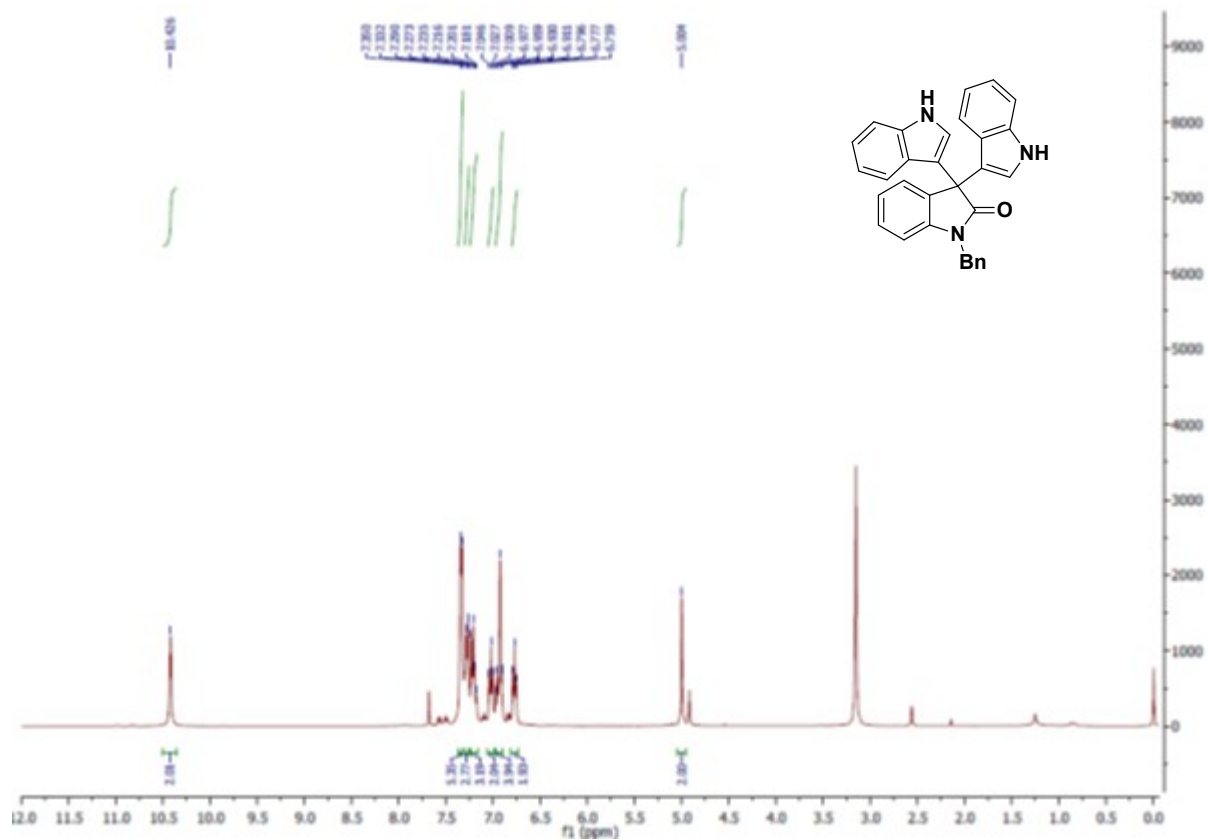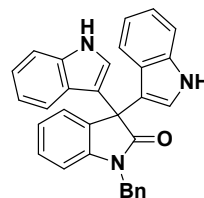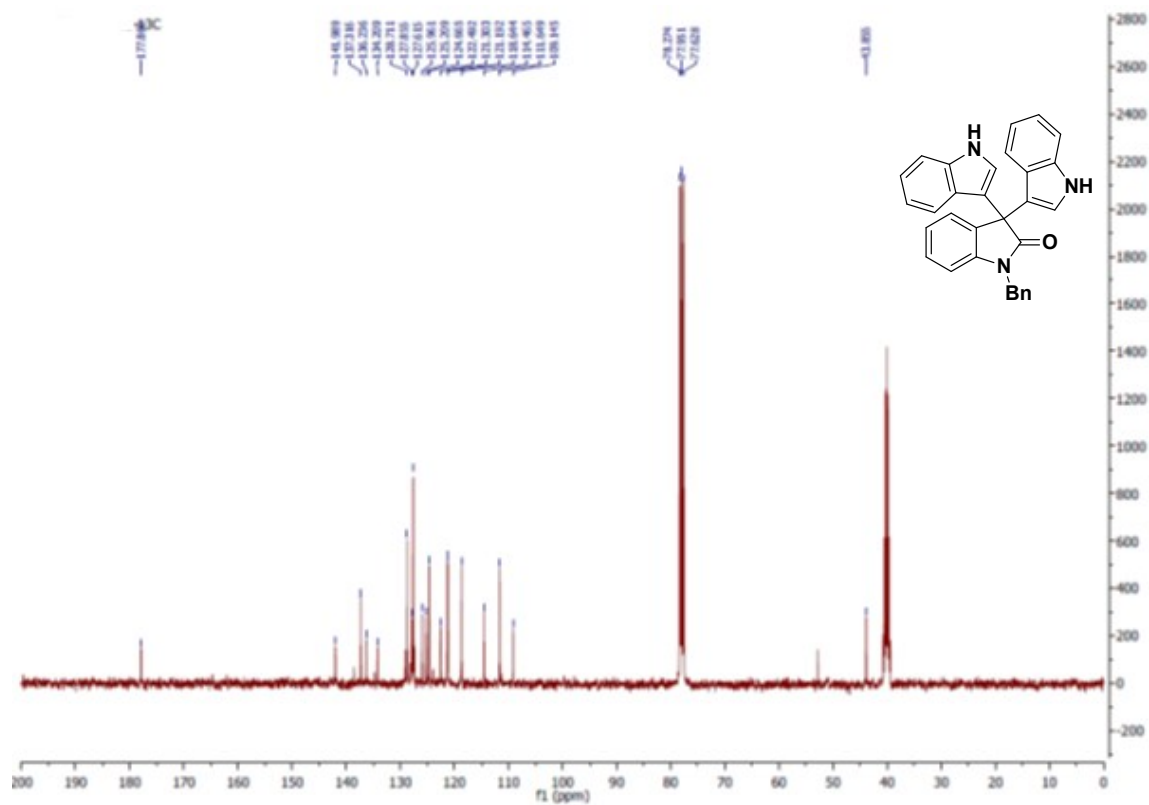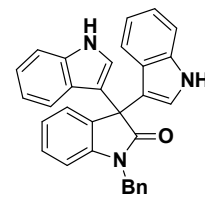

|             |           |                        |         |                 |                      |
|-------------|-----------|------------------------|---------|-----------------|----------------------|
| Sample Name | 548       | Position               | P1-A9   | Instrument Name | Instrument 1         |
| User Name   |           | Inj Vol                | 1       | InjPosition     |                      |
| Sample Type | Sample    | IRM Calibration Status | Success | Data Filename   | 13092017.13.d        |
| ACQ Method  | babji 2.m | Comment                |         | Acquired Time   | 13-Sep-17 5:30:30 PM |

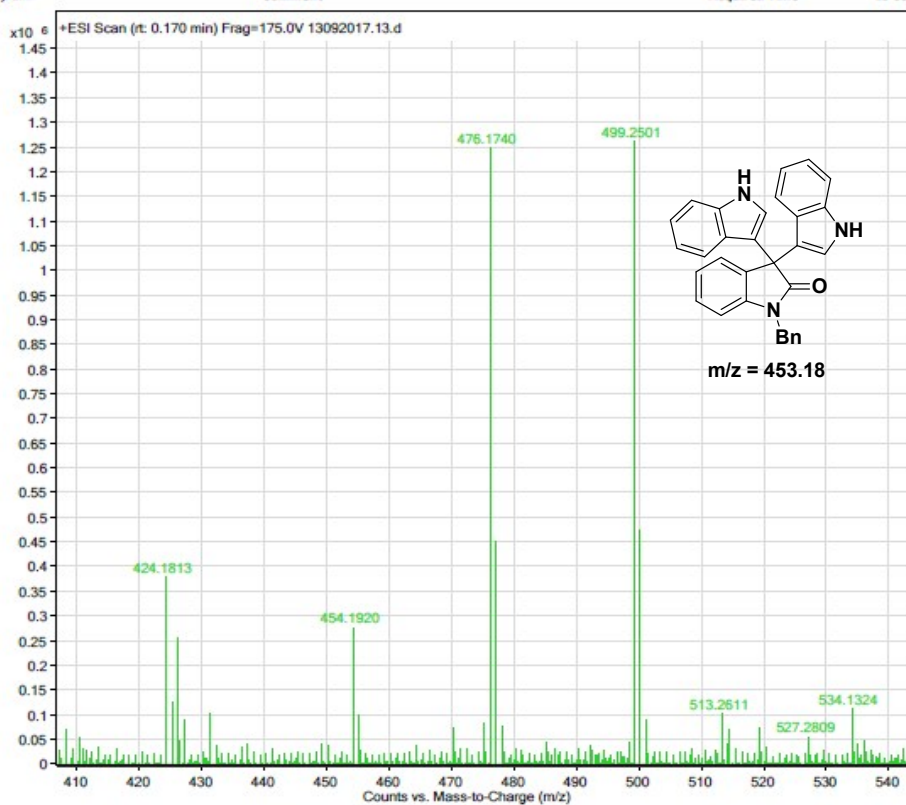

**1,1''-dibenzyl-1H,1''H-[3,3':3',3''-terbenzo[b]pyrrol]-2'(1'H)-one (16f):**

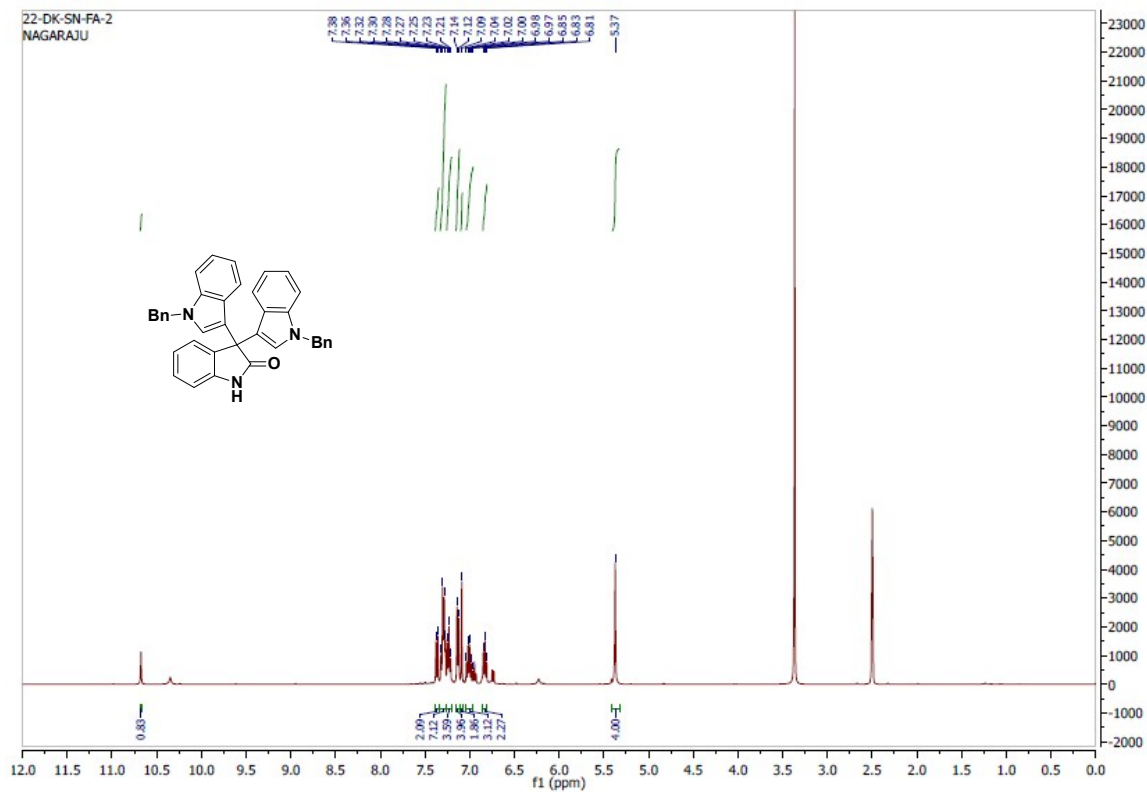

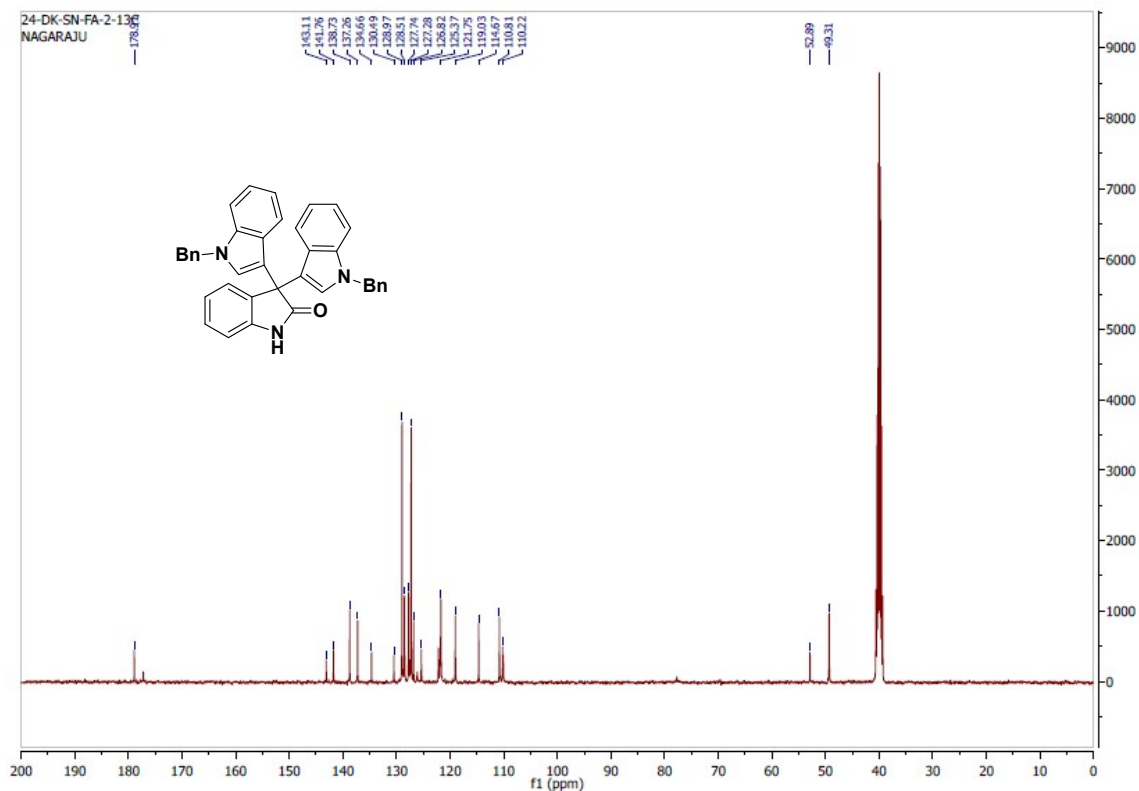

*1'-benzyl-5,5''-dibromo-1H,1''H-[3,3':3',3''-terbenzo[b]pyrrol]-2'(1'H)-one (16h):*

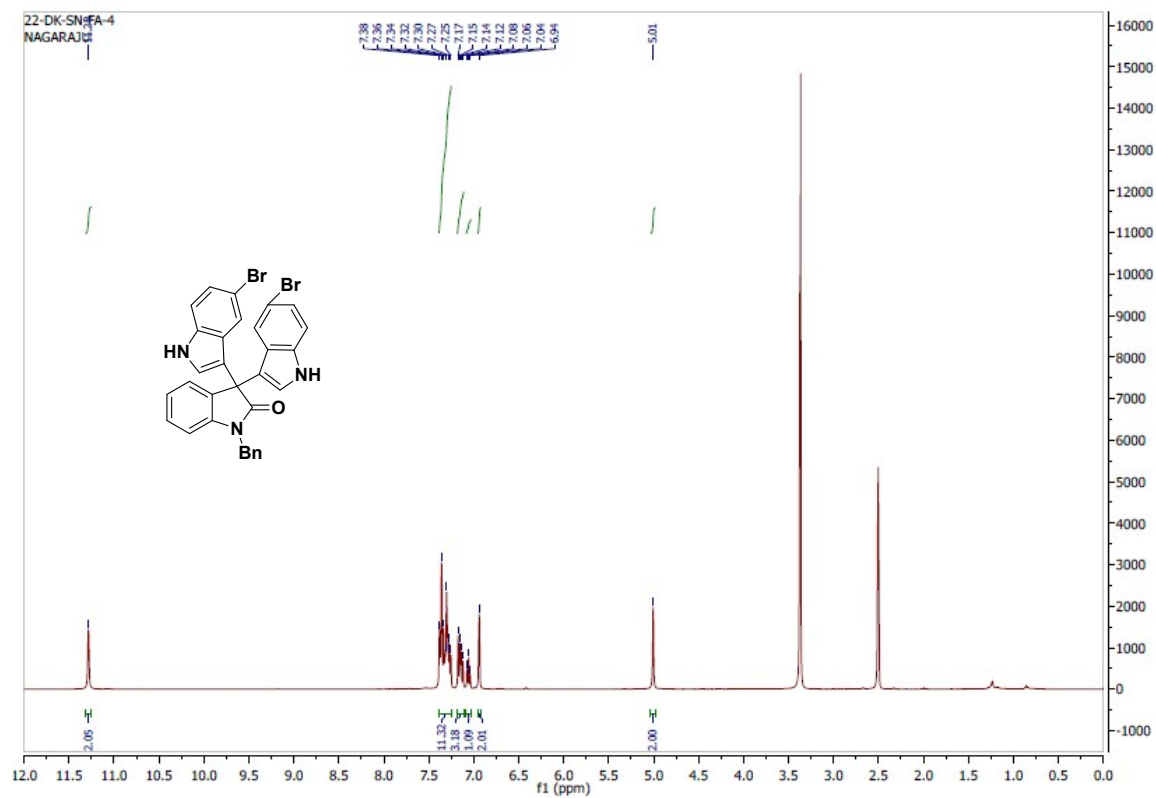

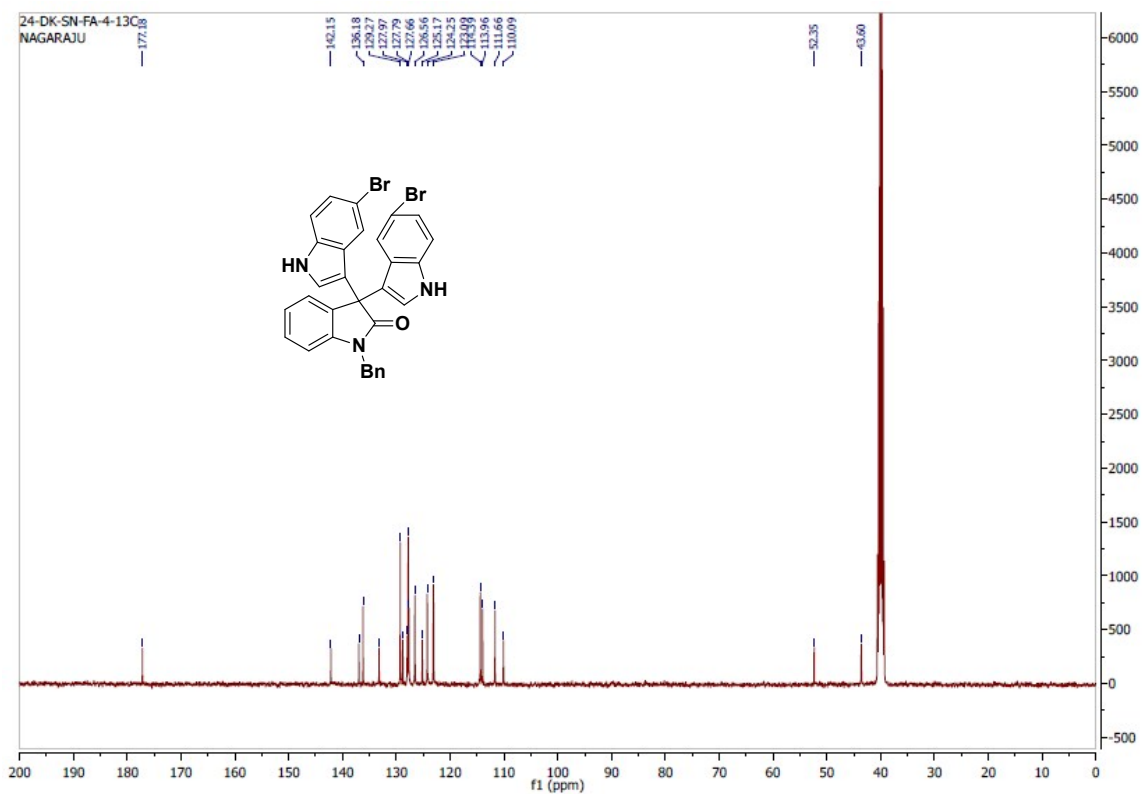

**2,2''-dimethyl-1H,1''H-[3,3':3',3''-terbenzo[b]pyrrol]-2'(1'H)-one (16i):**

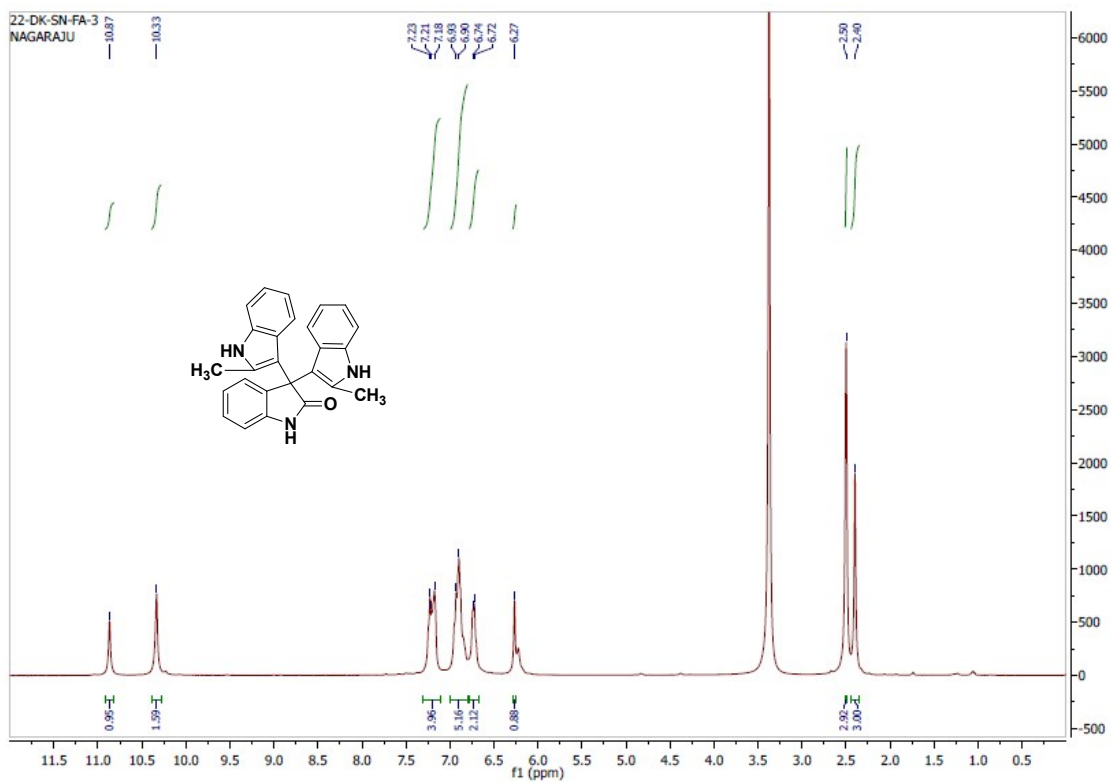

**1'-ethyl-2,2''-dimethyl-1H,1''H-[3,3':3,3''-terbenzo[b]pyrrol]-2'(1'H)-one (16j):**

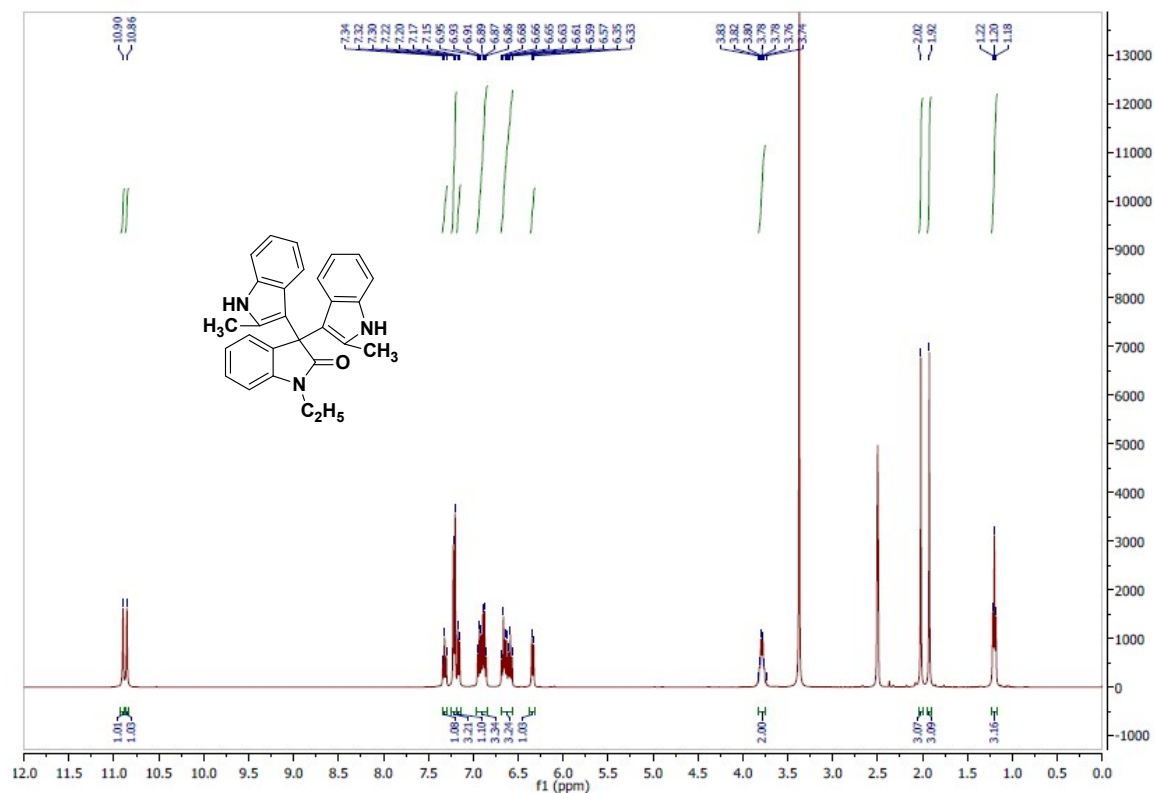

**1'-allyl-5,5''-dibromo-1H,1''H-[3,3':3,3''-terbenzo[b]pyrrol]-2'(1'H)-one (16k):**

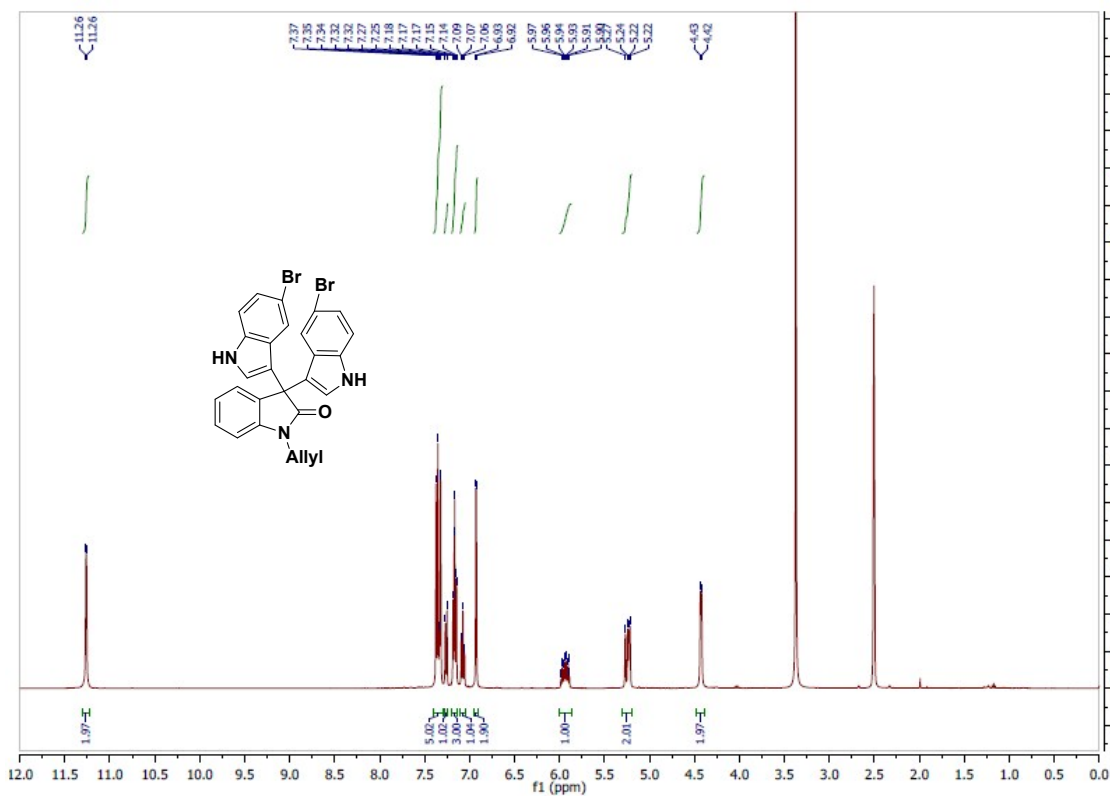



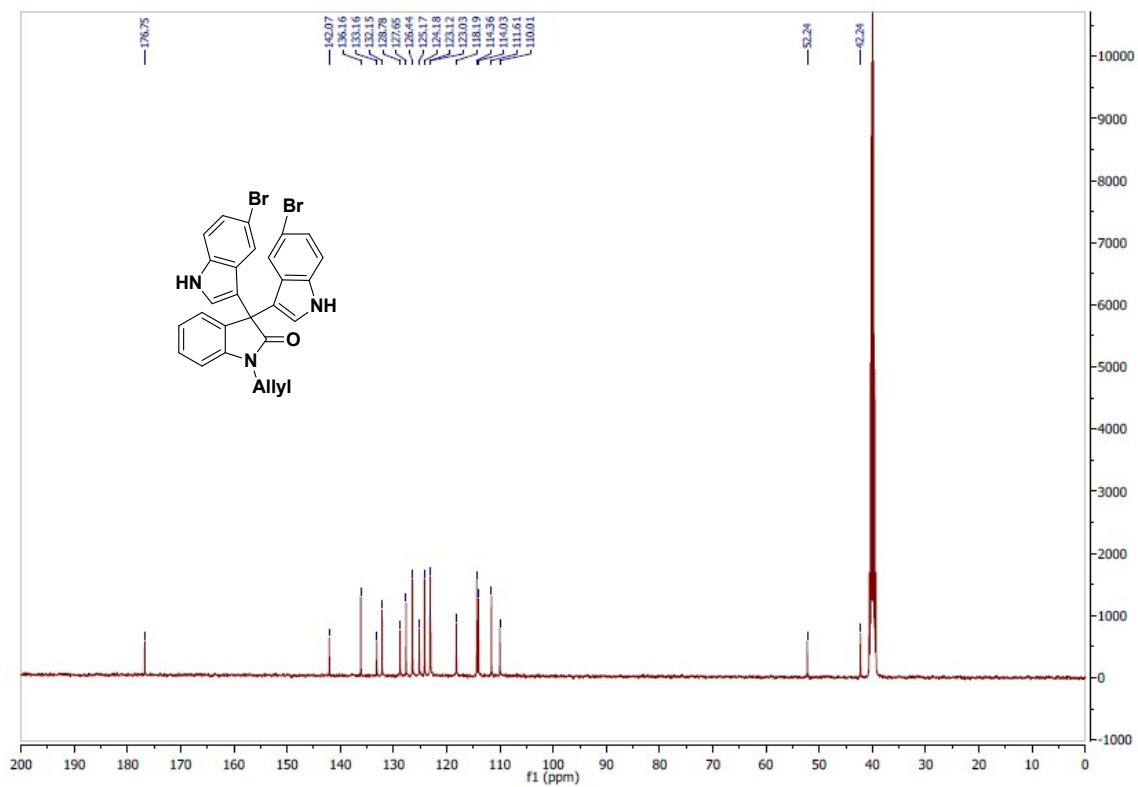

***1'-benzyl-2-methyl-1H,1''H-[3,3':3',3''-terbenzo[b]pyrrol]-2'(1'H)-one (19c):***

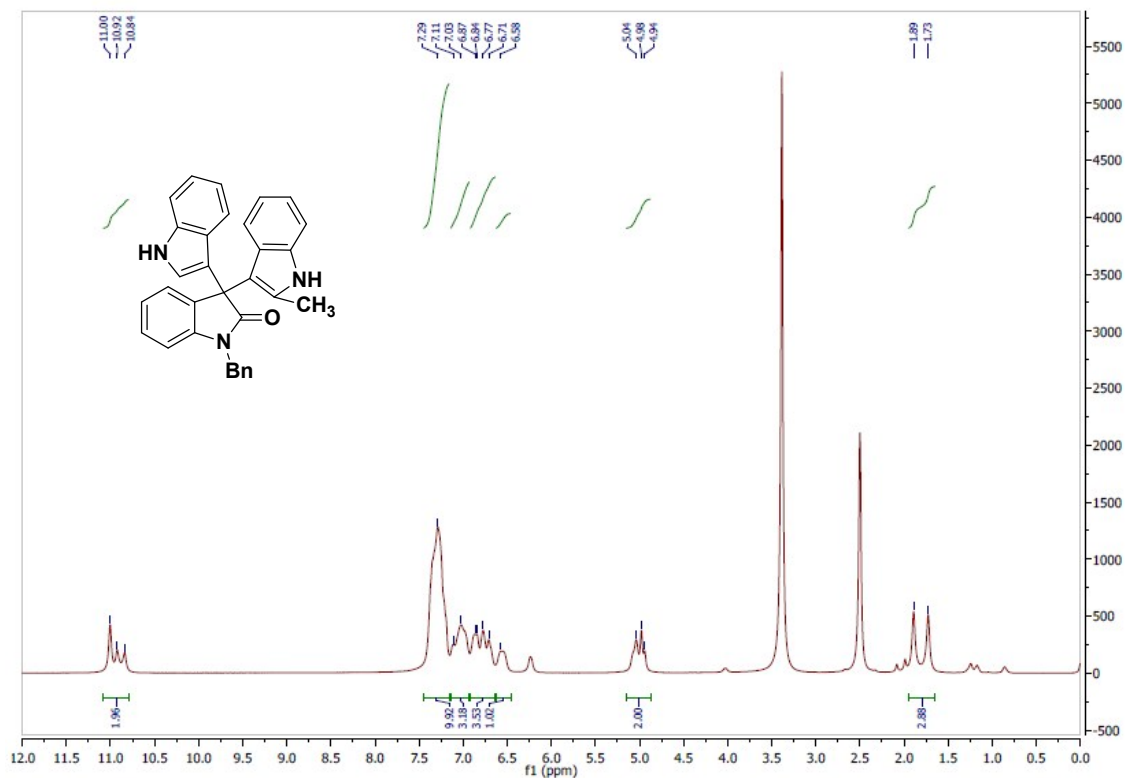

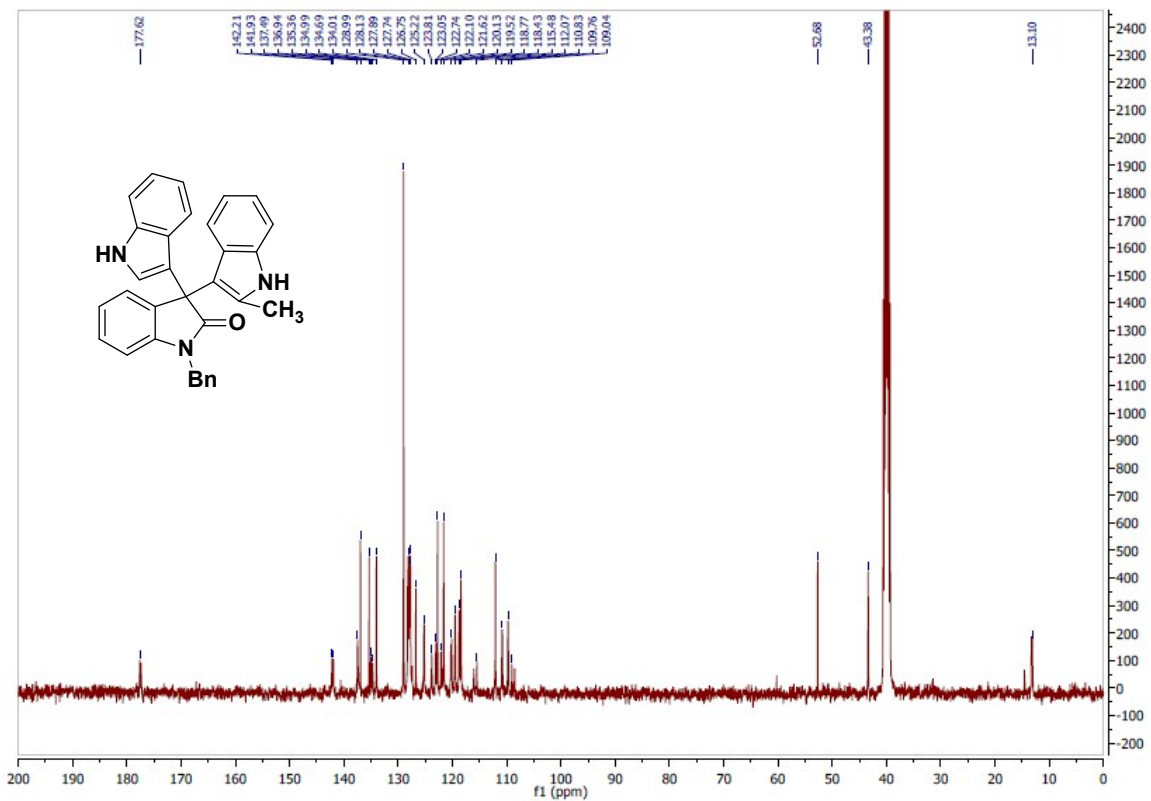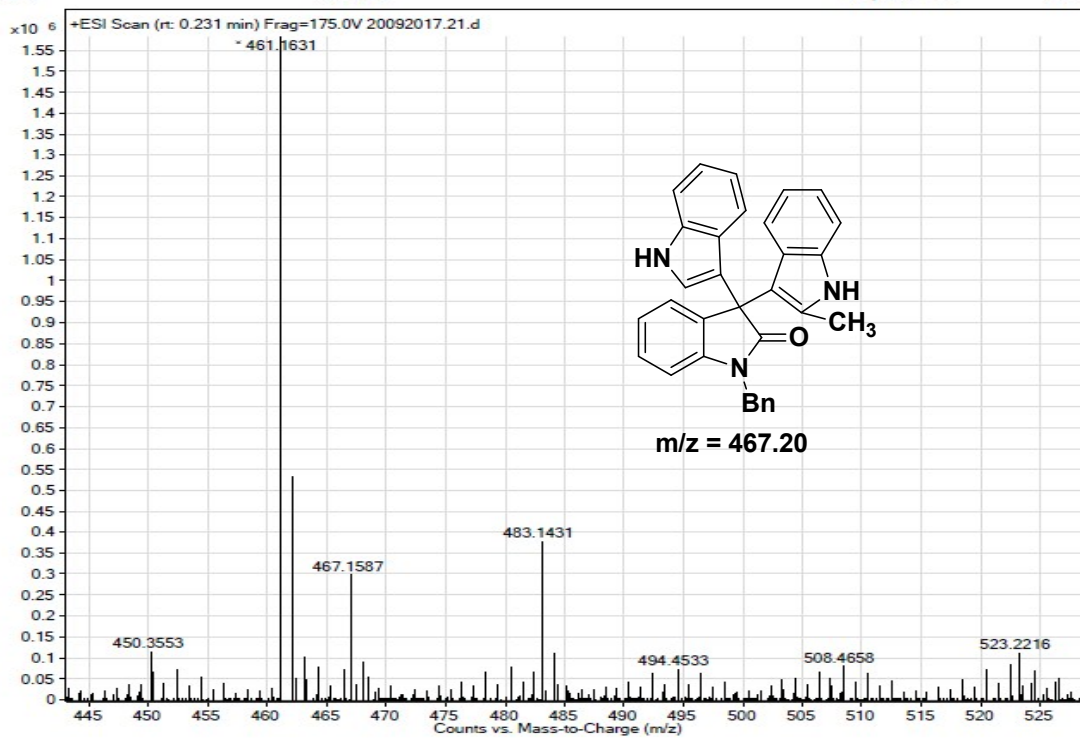

**1'-allyl-2-methyl-1H,1''H-[3,3':3',3''-terbenzo[b]pyrrol]-2'(1'H)-one (19d):**

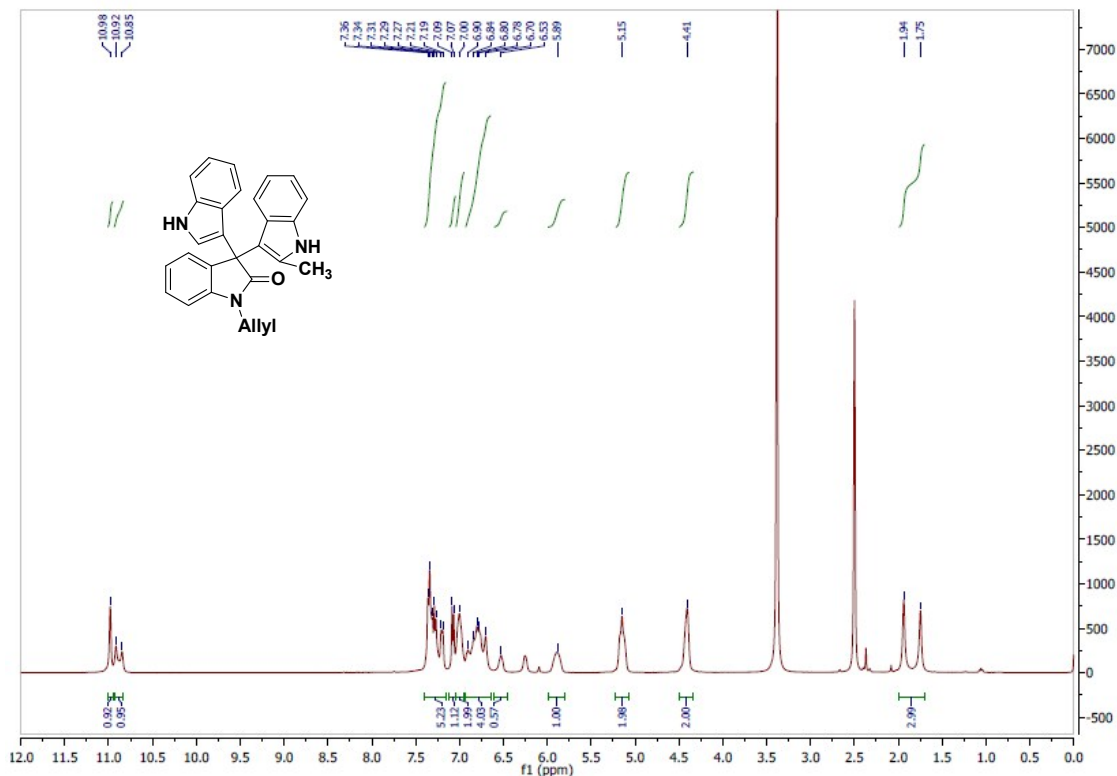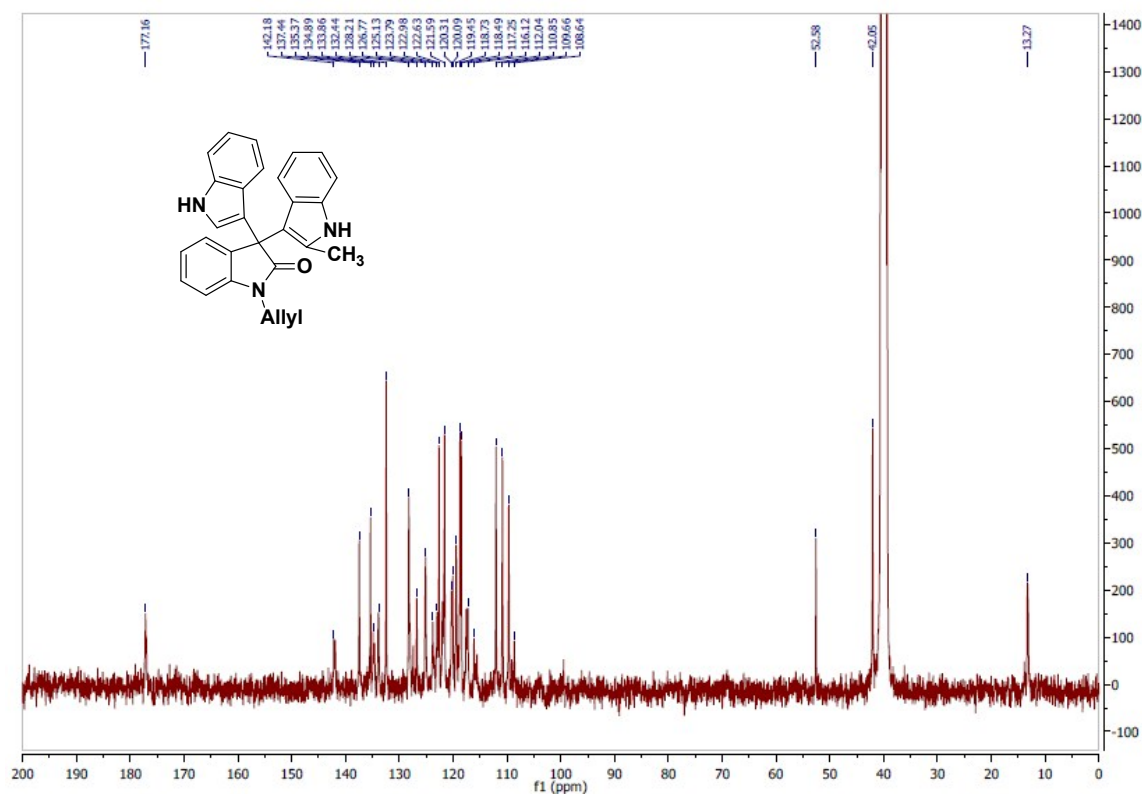

**1'-allyl-5-bromo-[3,3':3',3''-terindolin]-2'-one (19f):**

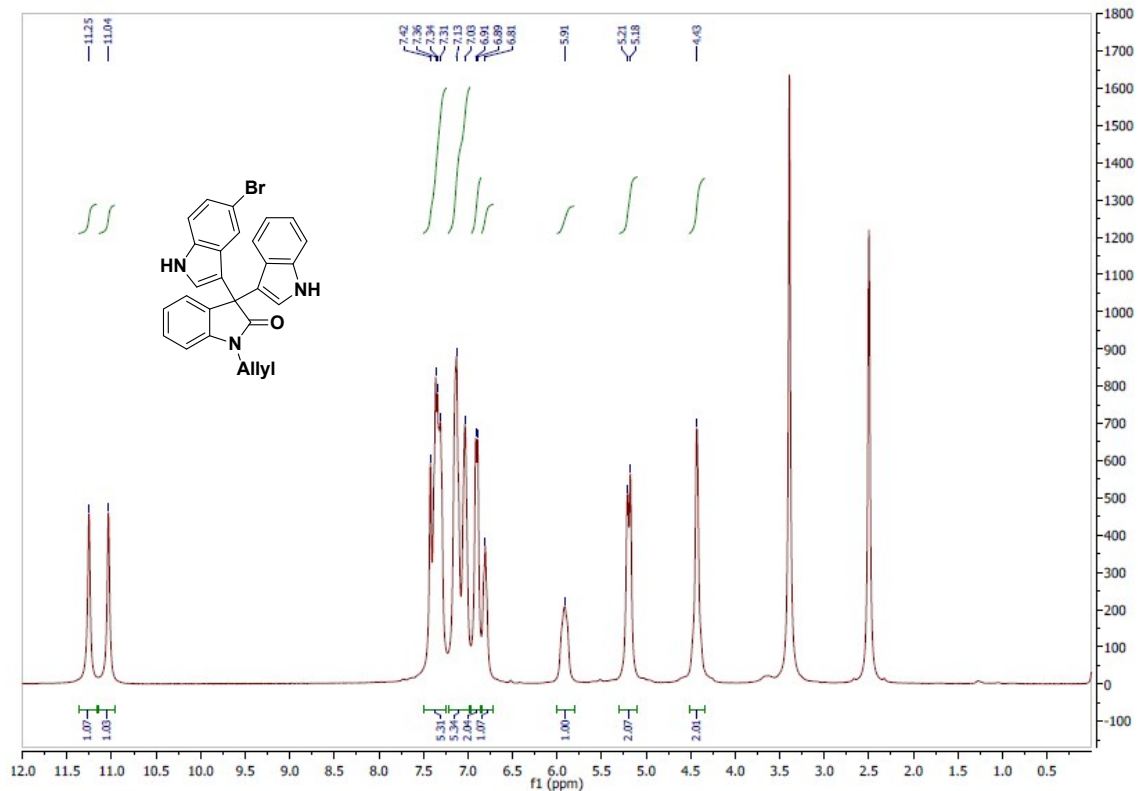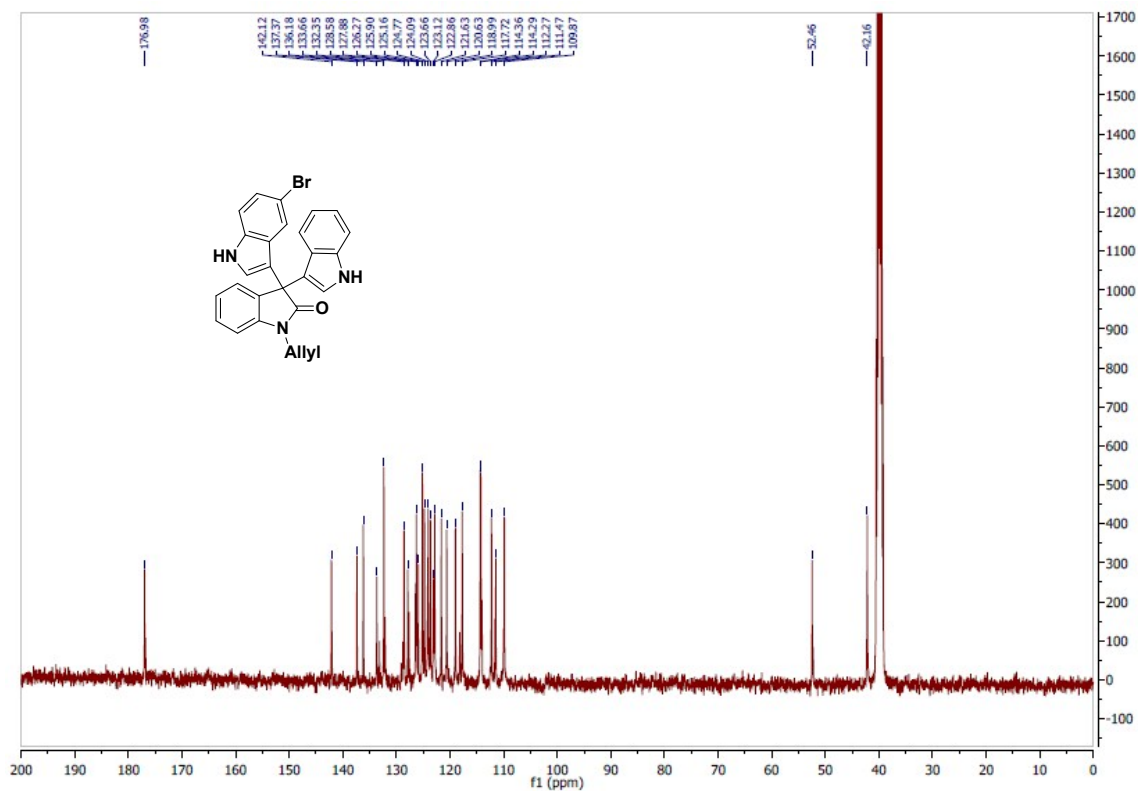

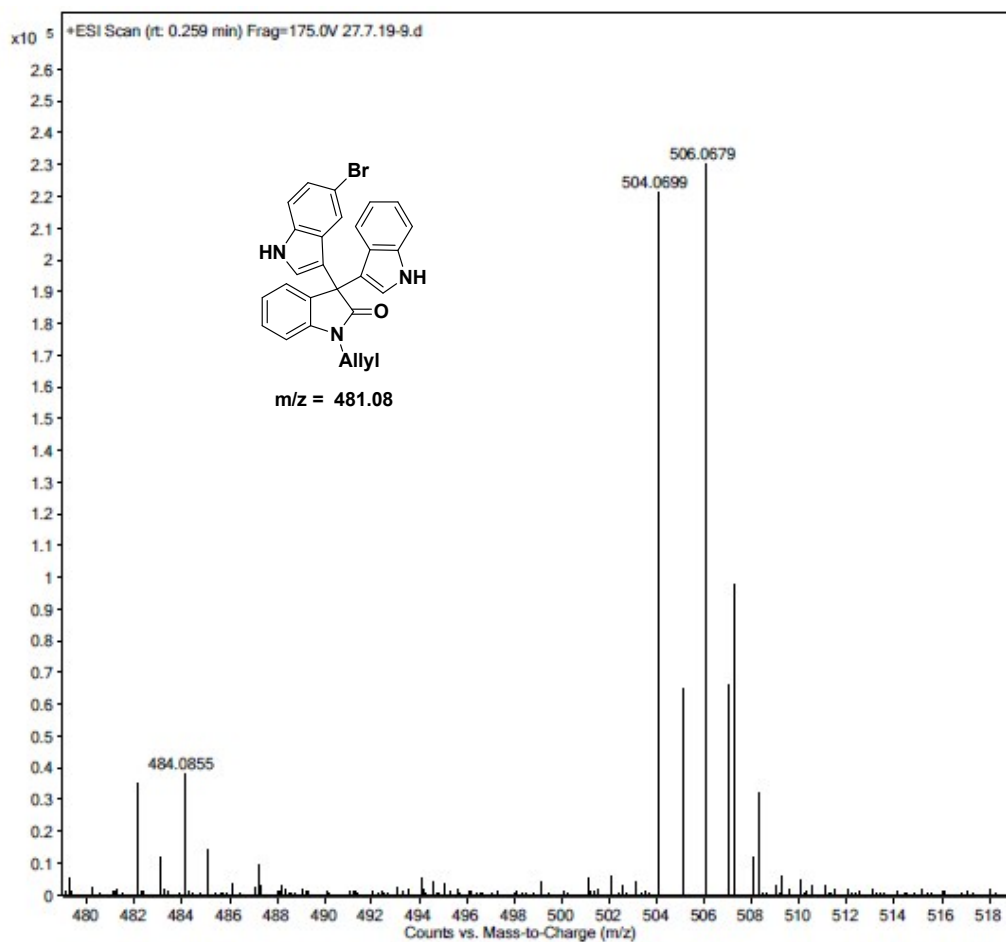

***1'-benzyl-5-bromo-[3,3':3',3''-terindolin]-2'-one (19g):***

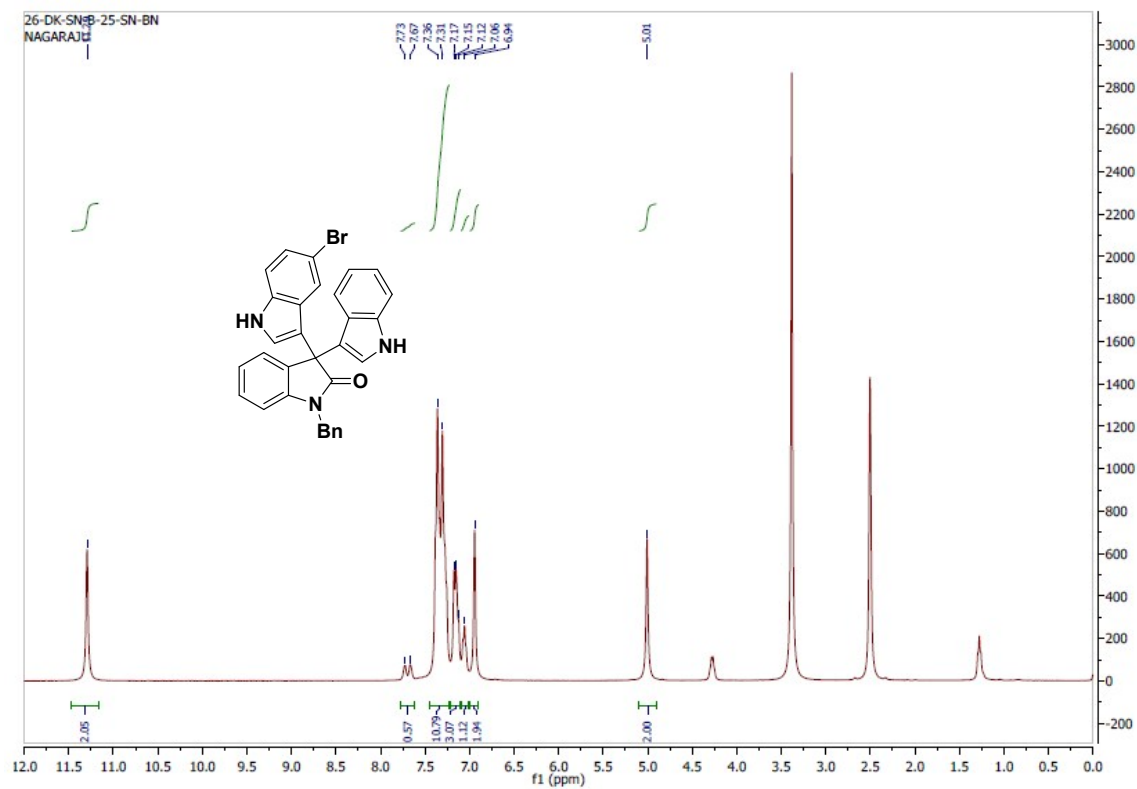

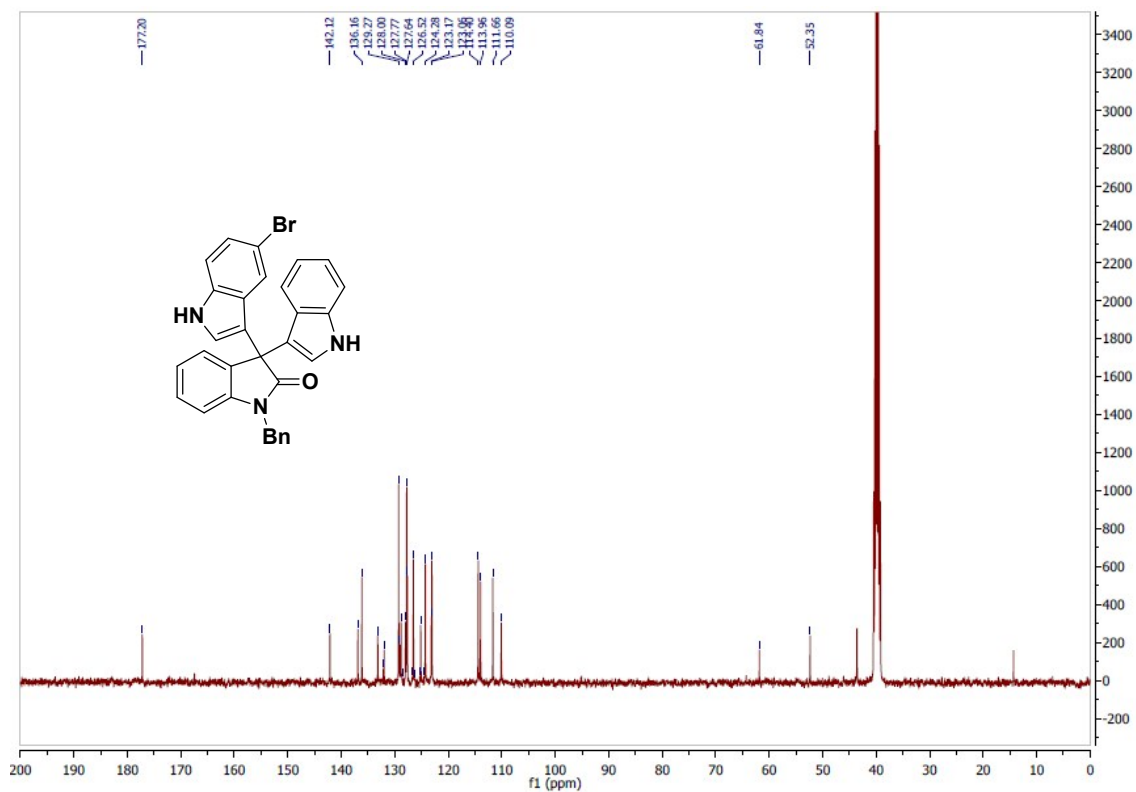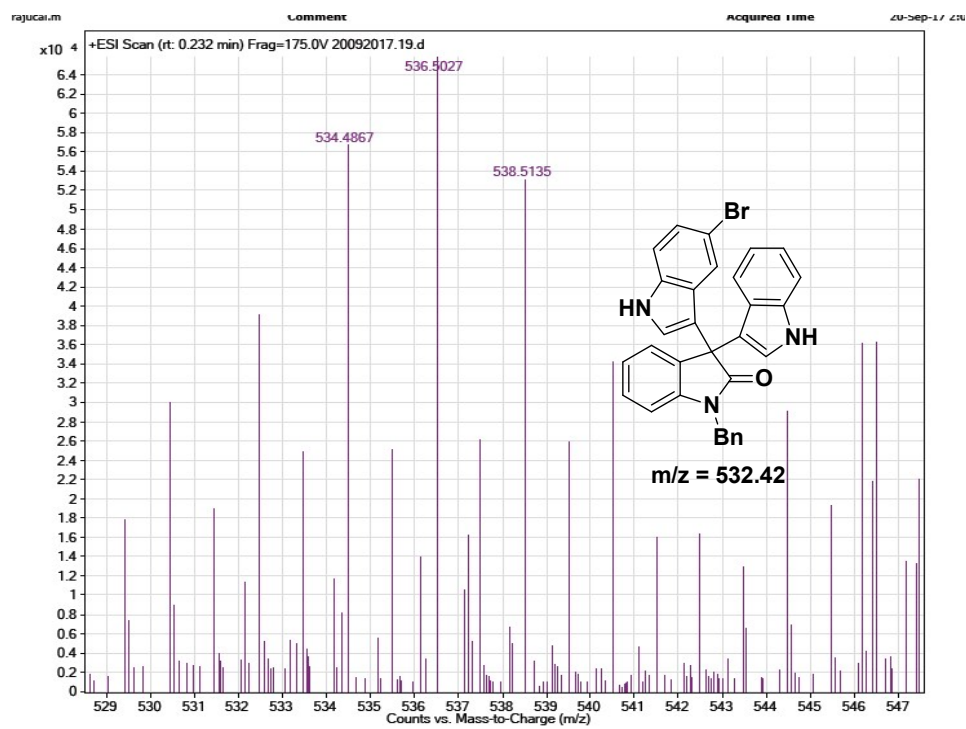

**1'-benzyl-5''-bromo-2-methyl-1H,1''H-[3,3':3',3''-terbenzo[b]pyrrol]-2'(1'H)-one (19h):**

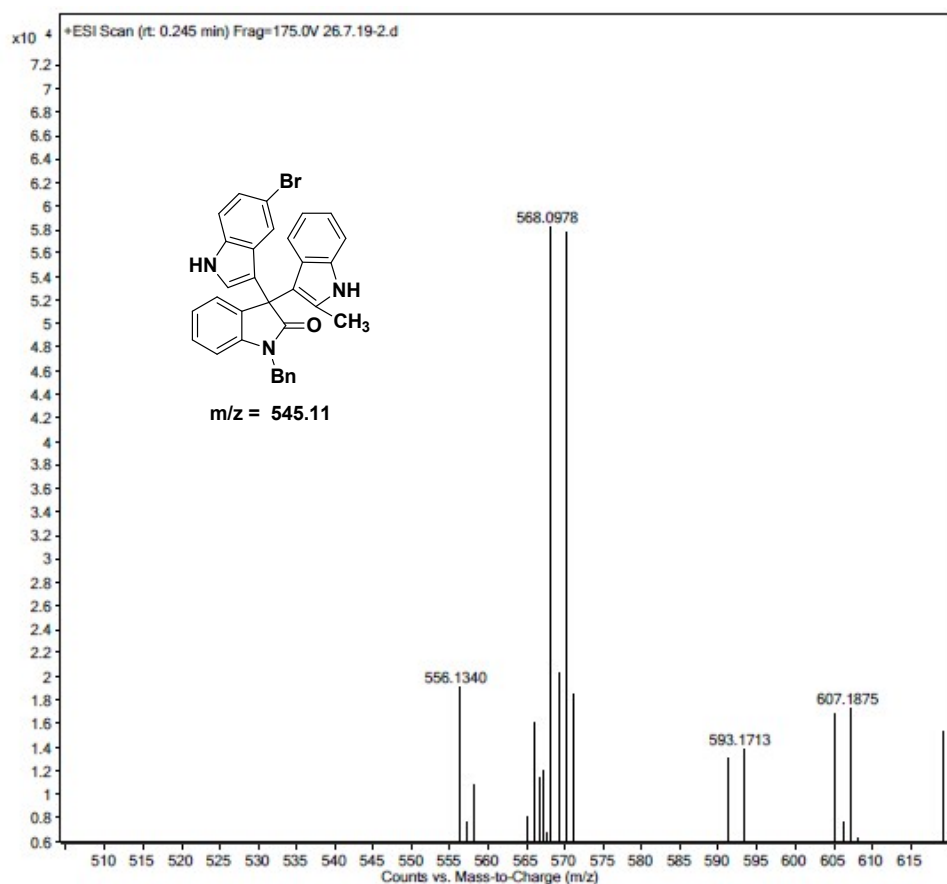

**1'-benzyl-5',5''-dibromo-2-methyl-1H,1''H-[3,3':3',3''-terbenzo[b]pyrrol]-2'(1'H)-one (19i):**

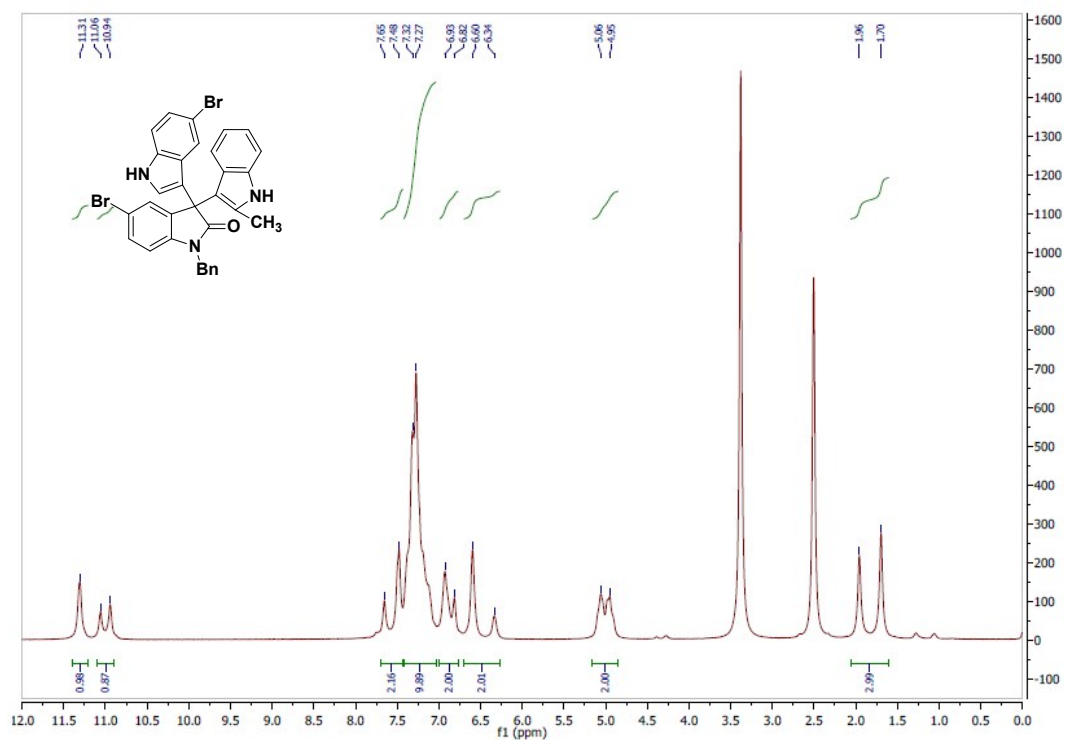

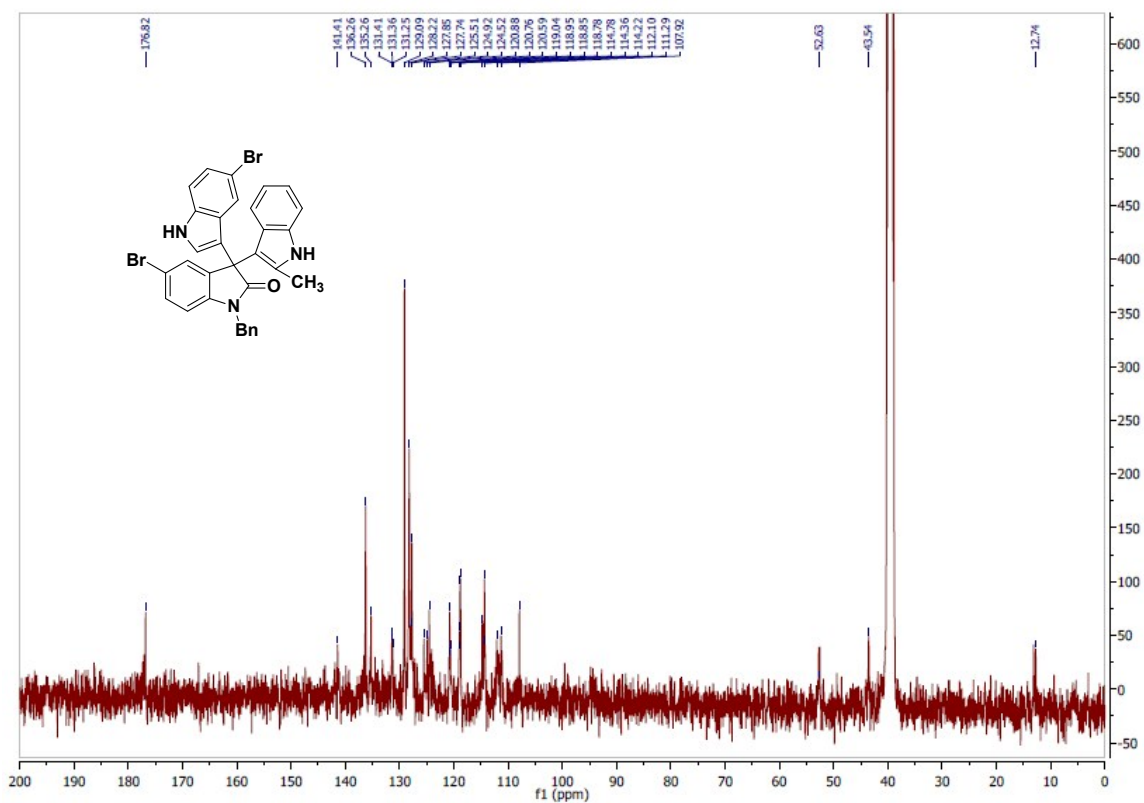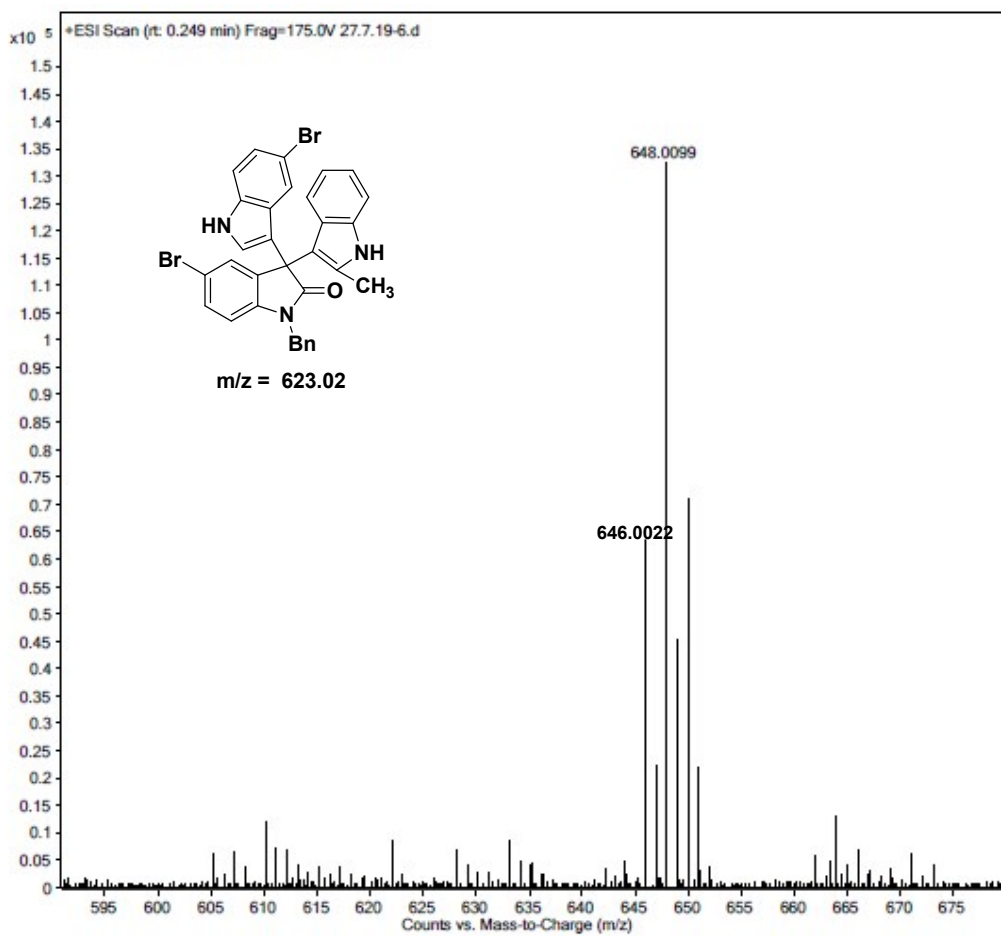



**1'-allyl-5'-chloro-2-methyl-1H,1''H-[3,3':3',3''-terbenzo[b]pyrrol]-2'(1'H)-one (19j):**

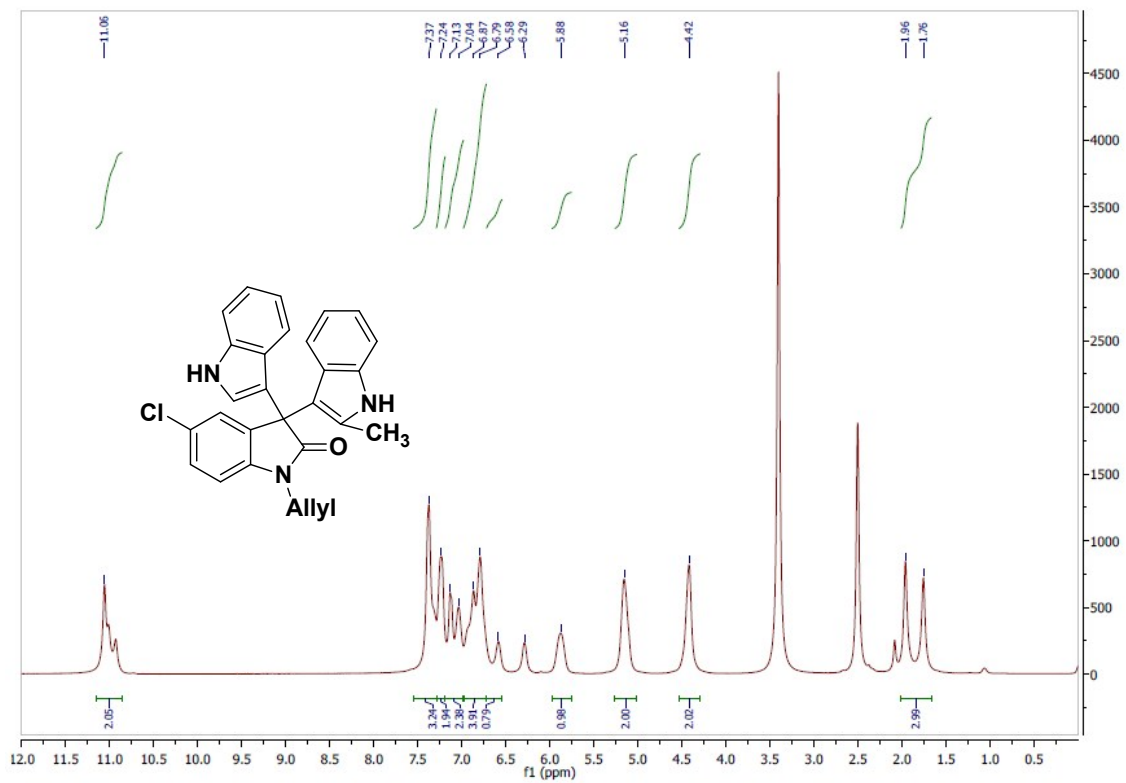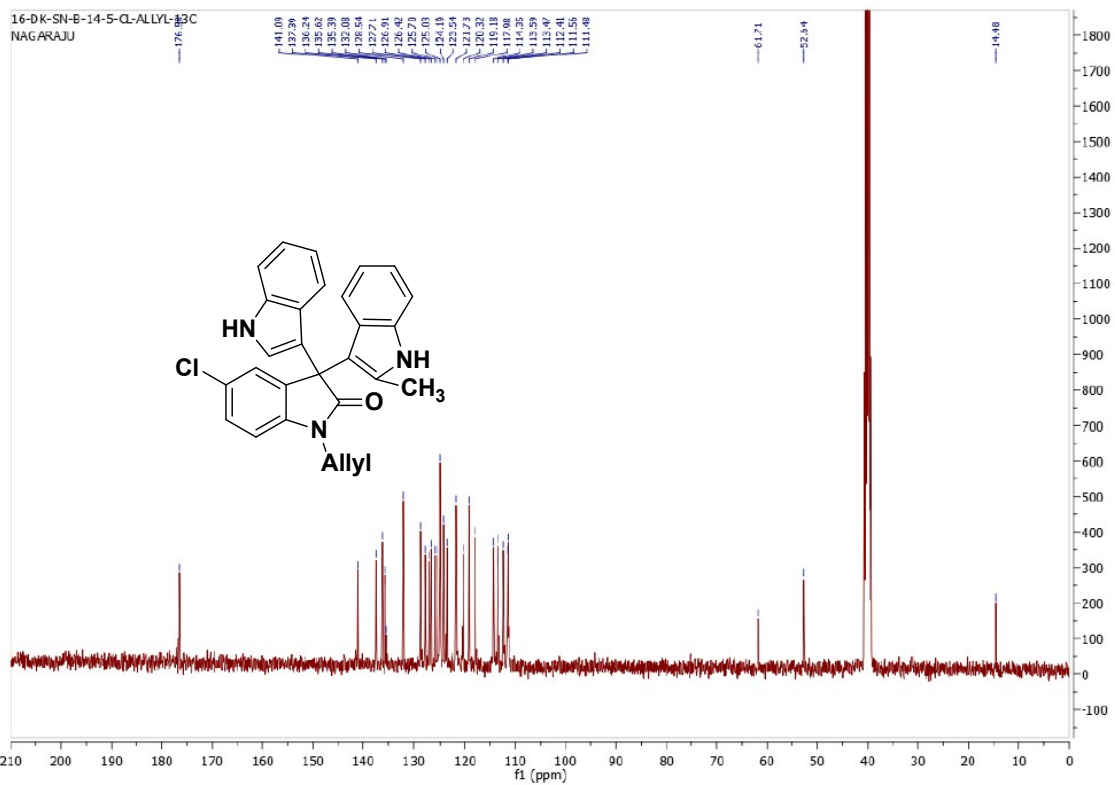

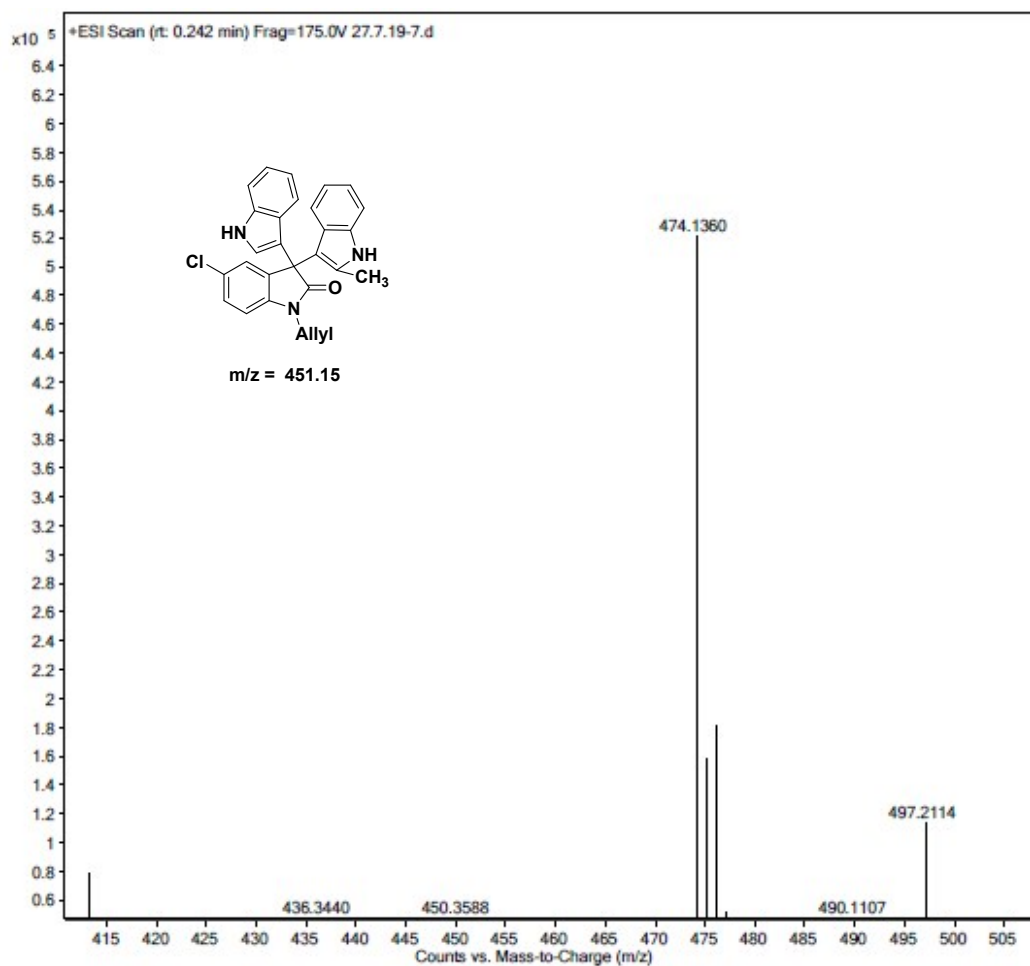

**1'-allyl-1-benzyl-5''-bromo-1H,1''H-[3,3':3',3''-terbenzo[b]pyrrol]-2'(1'H)-one (19k):**

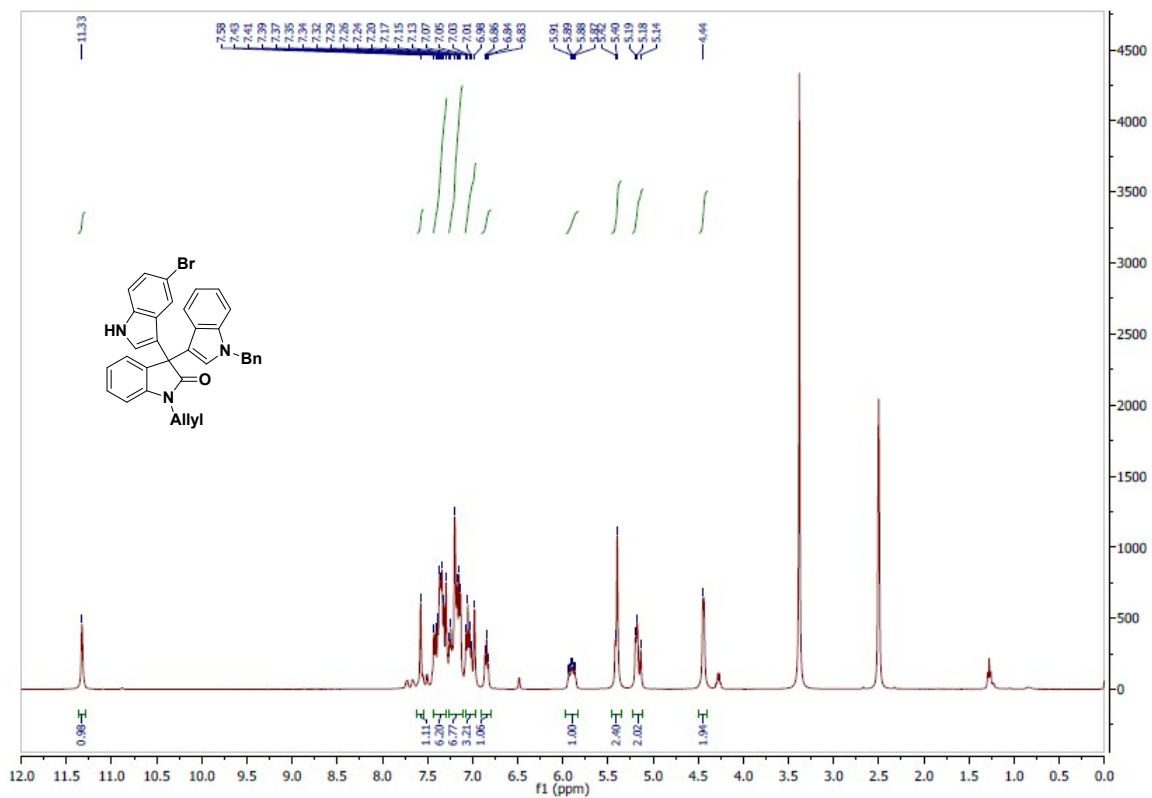

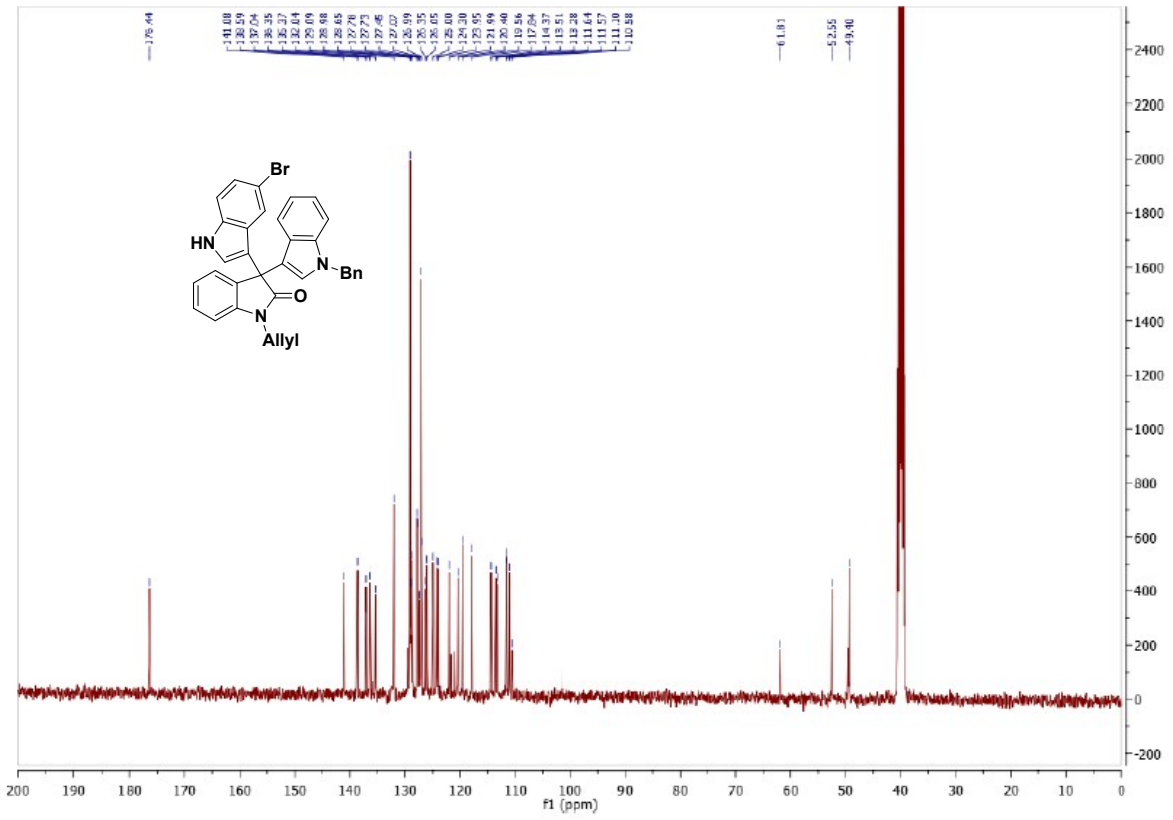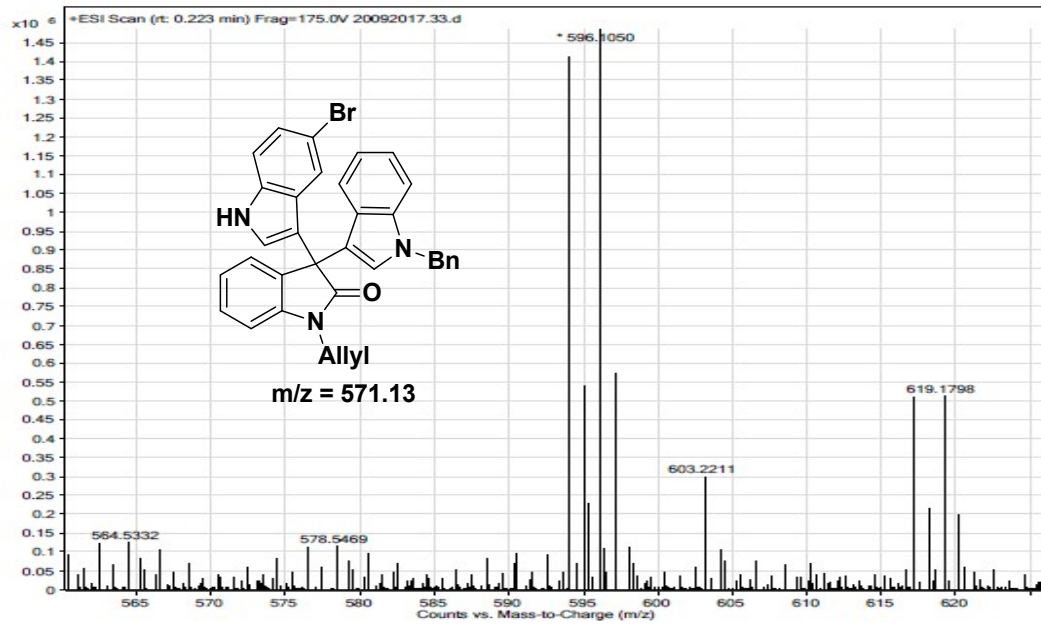

**1'-benzyl-5-bromo-5'-chloro-[3,3':3',3''-terindolin]-2'-one (19l):**

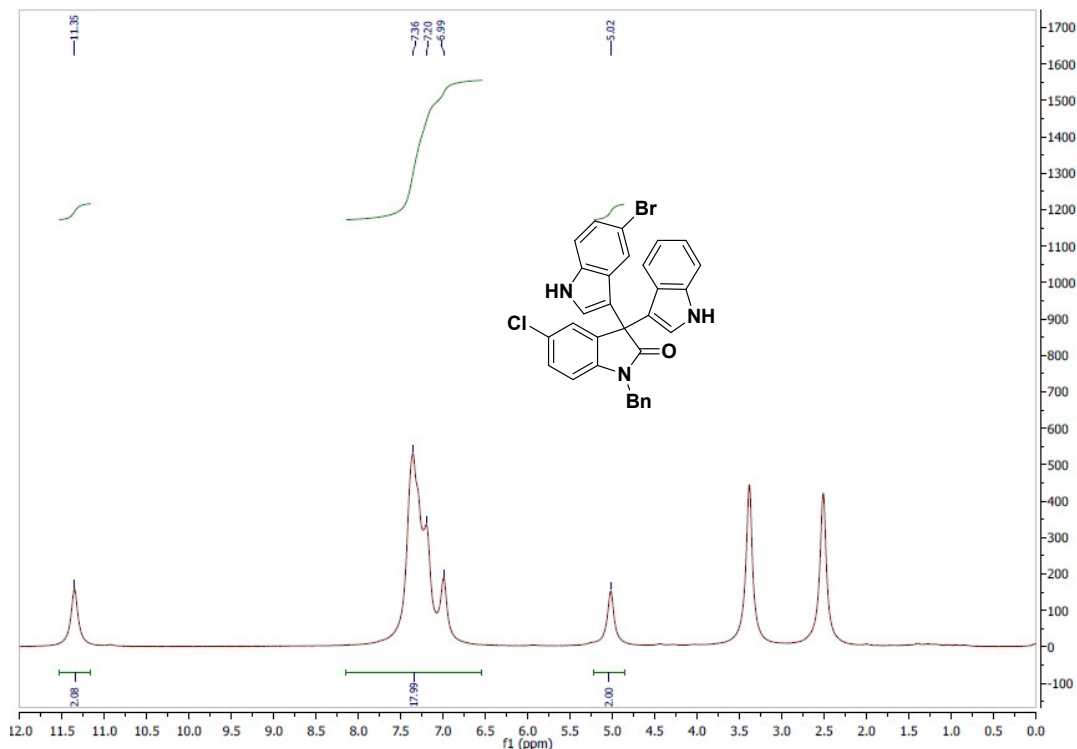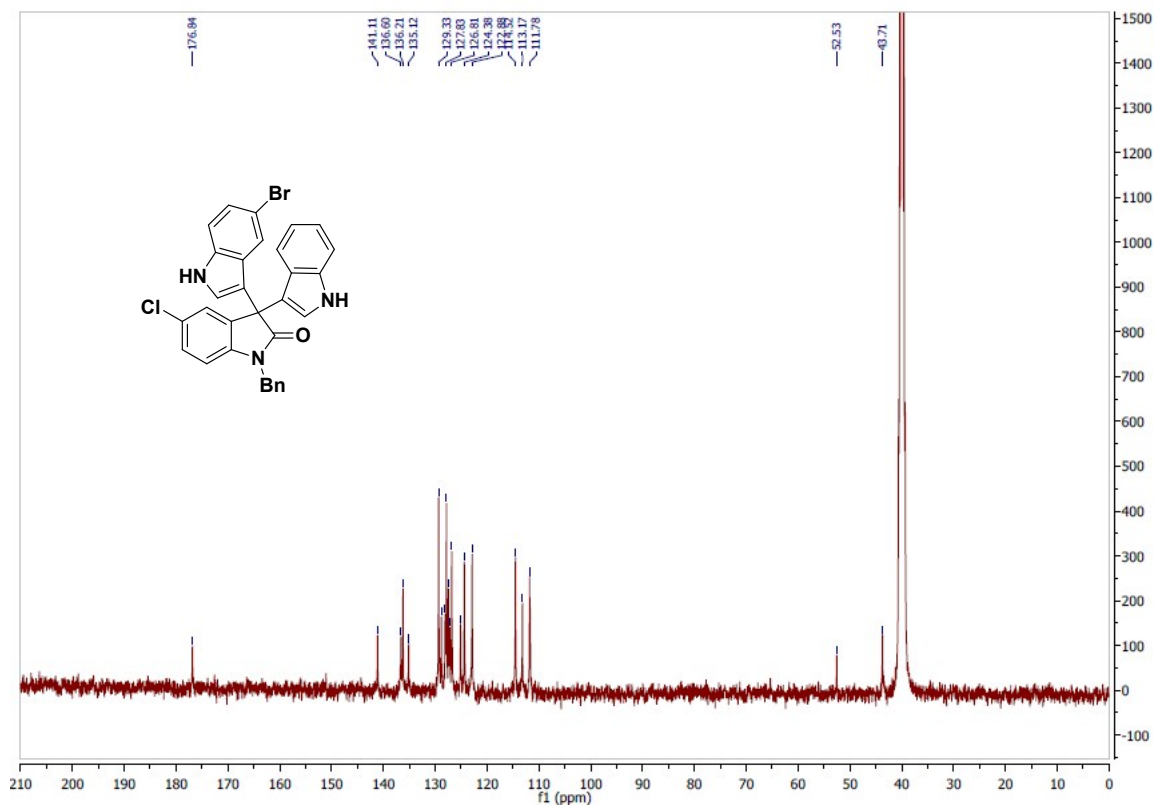

**1'-allyl-5-bromo-5'-chloro-1H,1''H-[3,3':3',3''-terbenzo[b]pyrrol]-2'(1'H)-one (19m):**

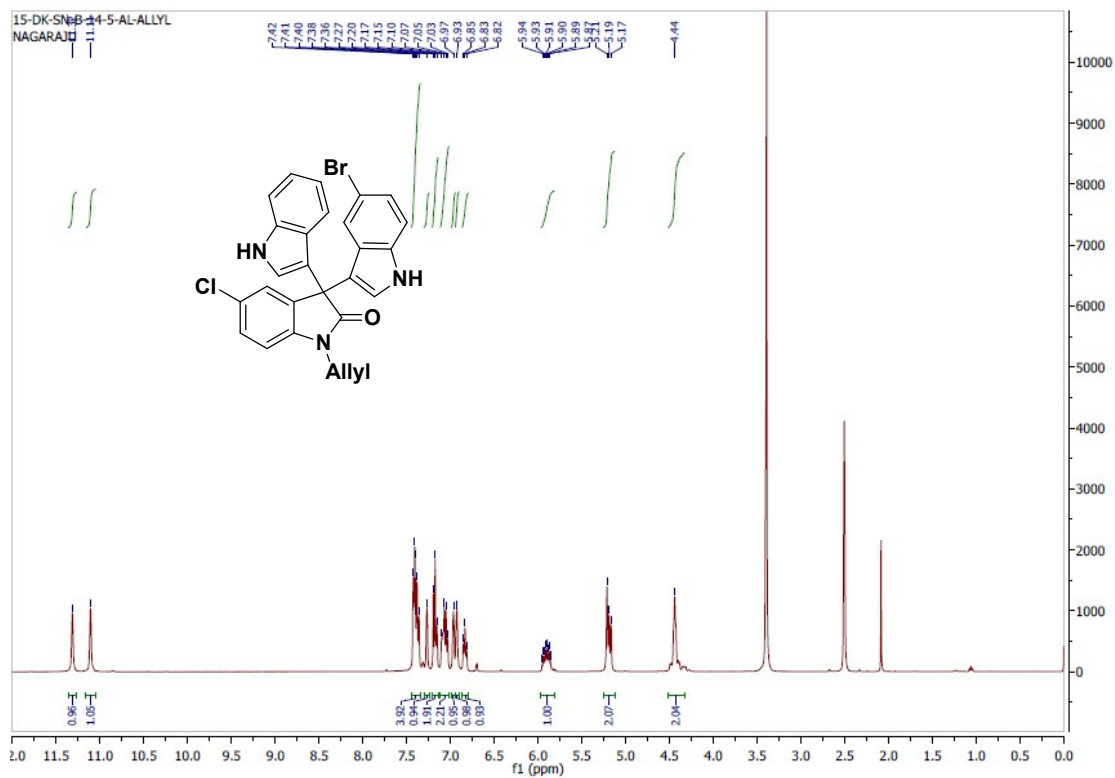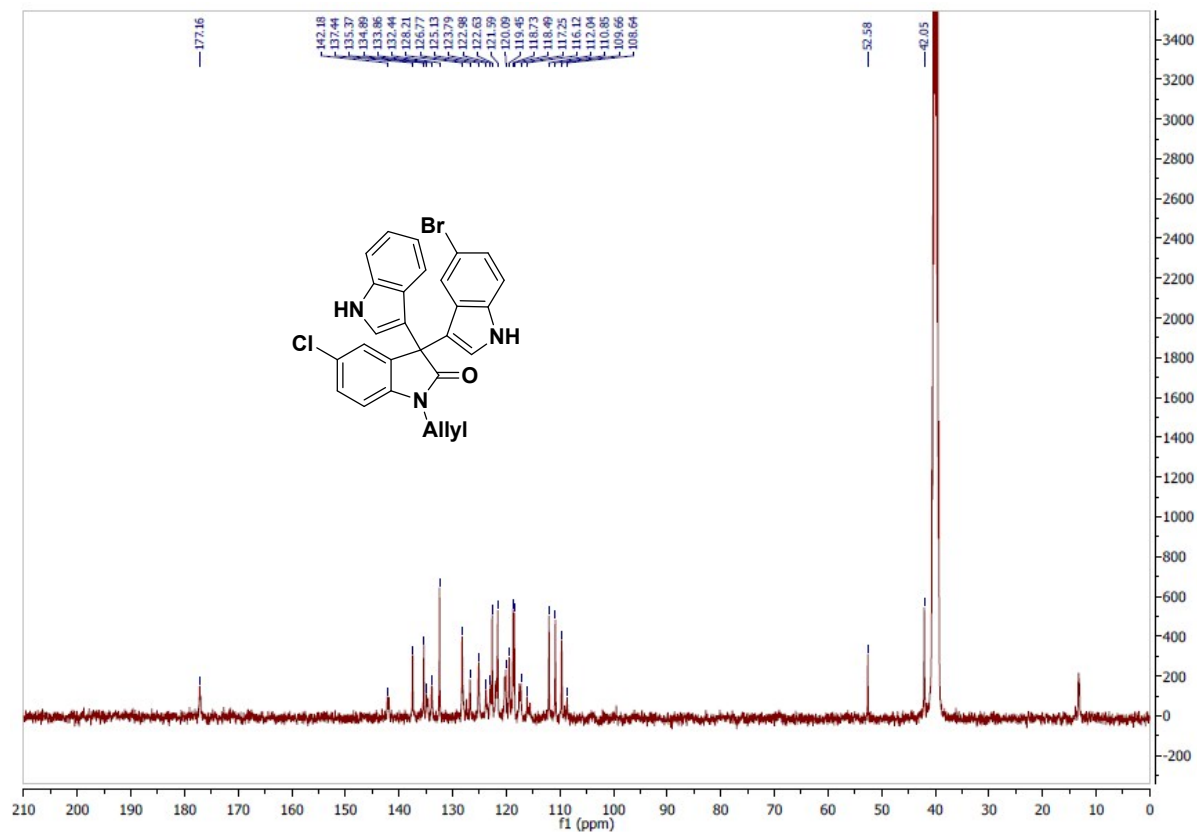

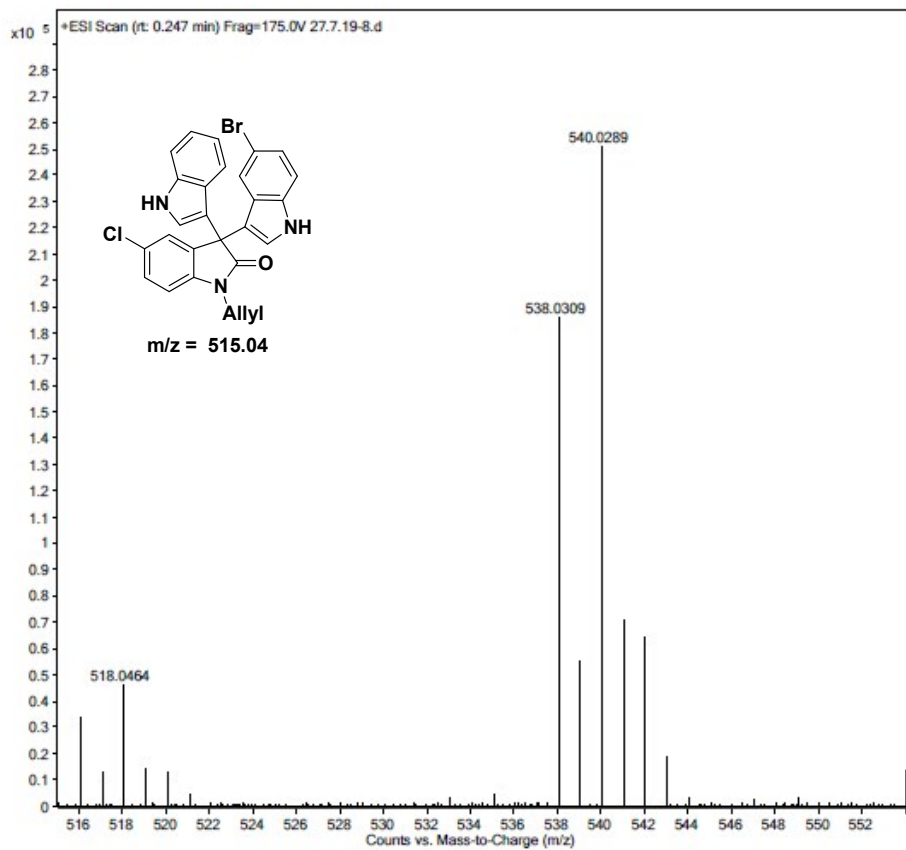

***Ethyl 2-(5-bromo-5'-chloro-2'-oxo-1H,1''H-[3,3':3'',3''-terbenzo[b]pyrrol]-1'(2'H)-yl)acetate (19n):***

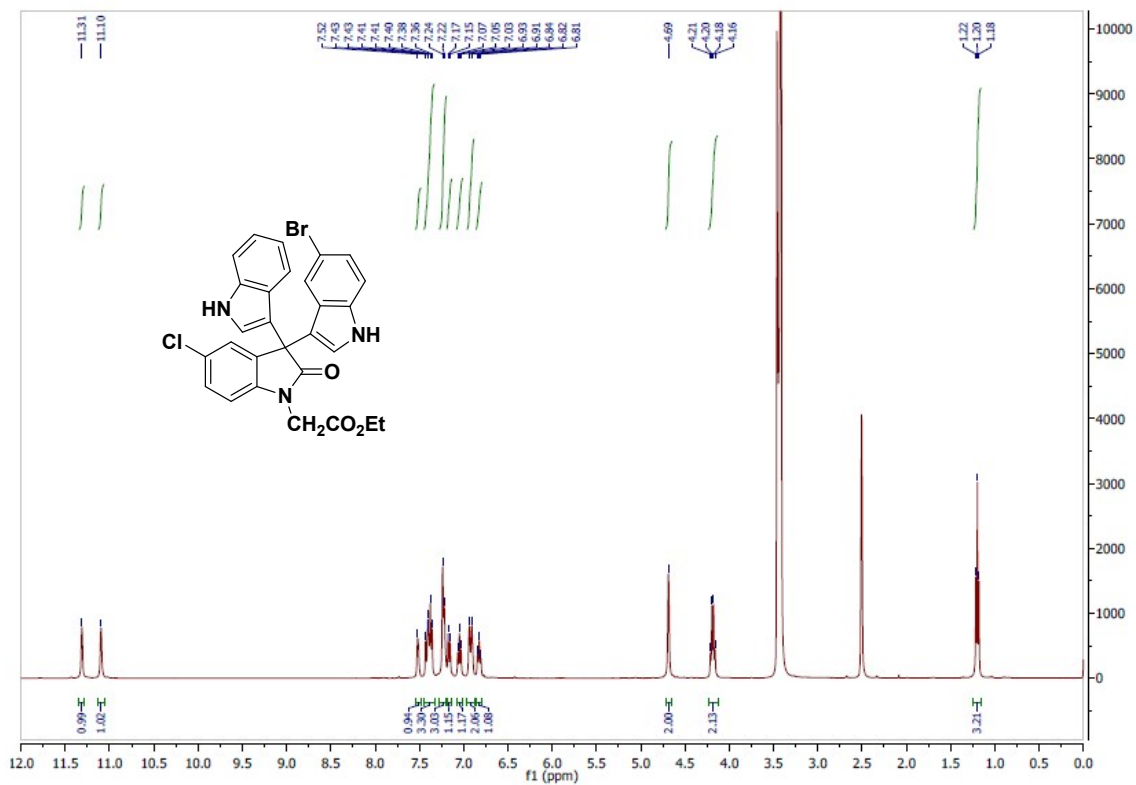

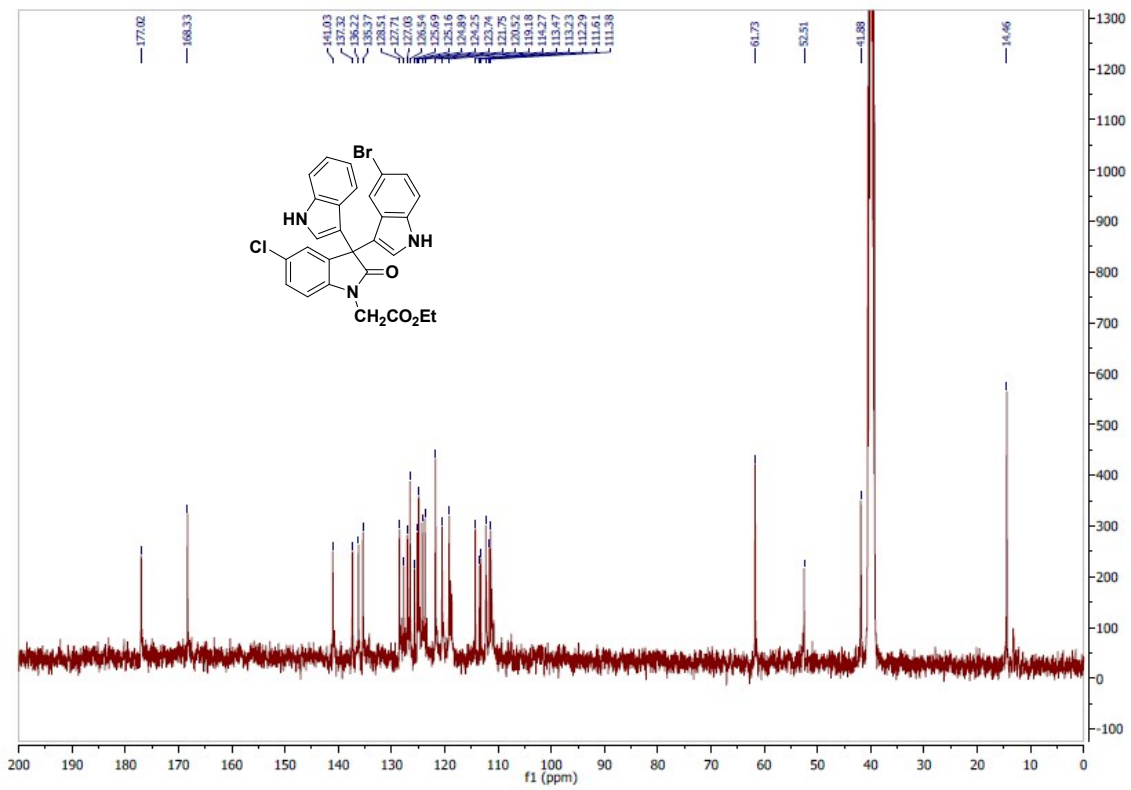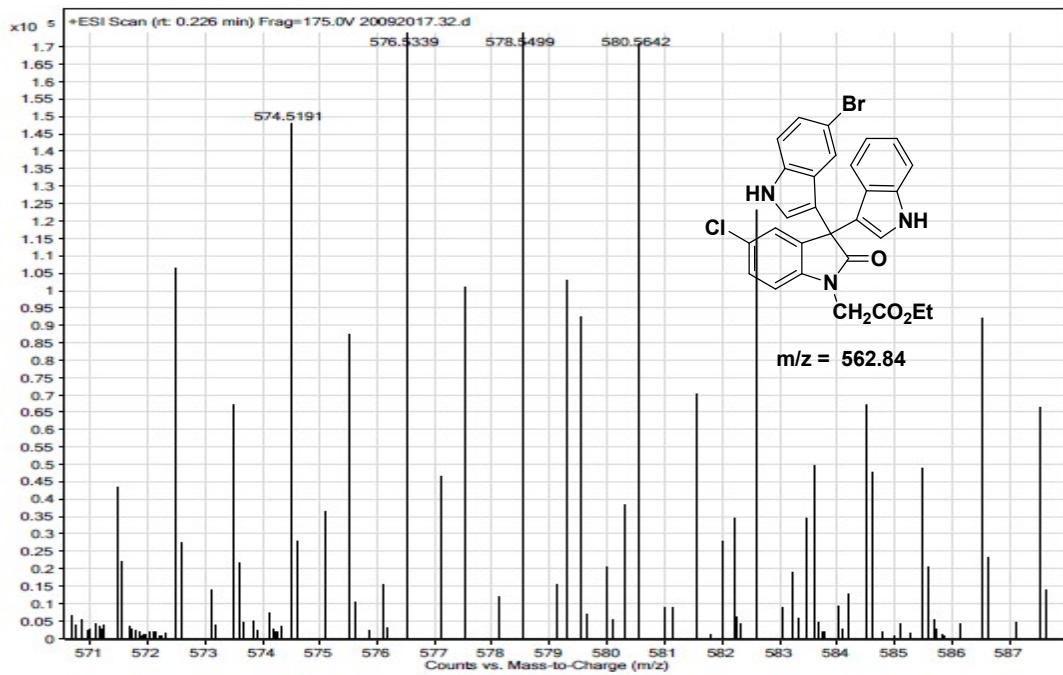

**1-benzyl-3-(4-(dimethylamino)phenyl)-3-(1H-indol-3-yl)indolin-2-one (21b):**

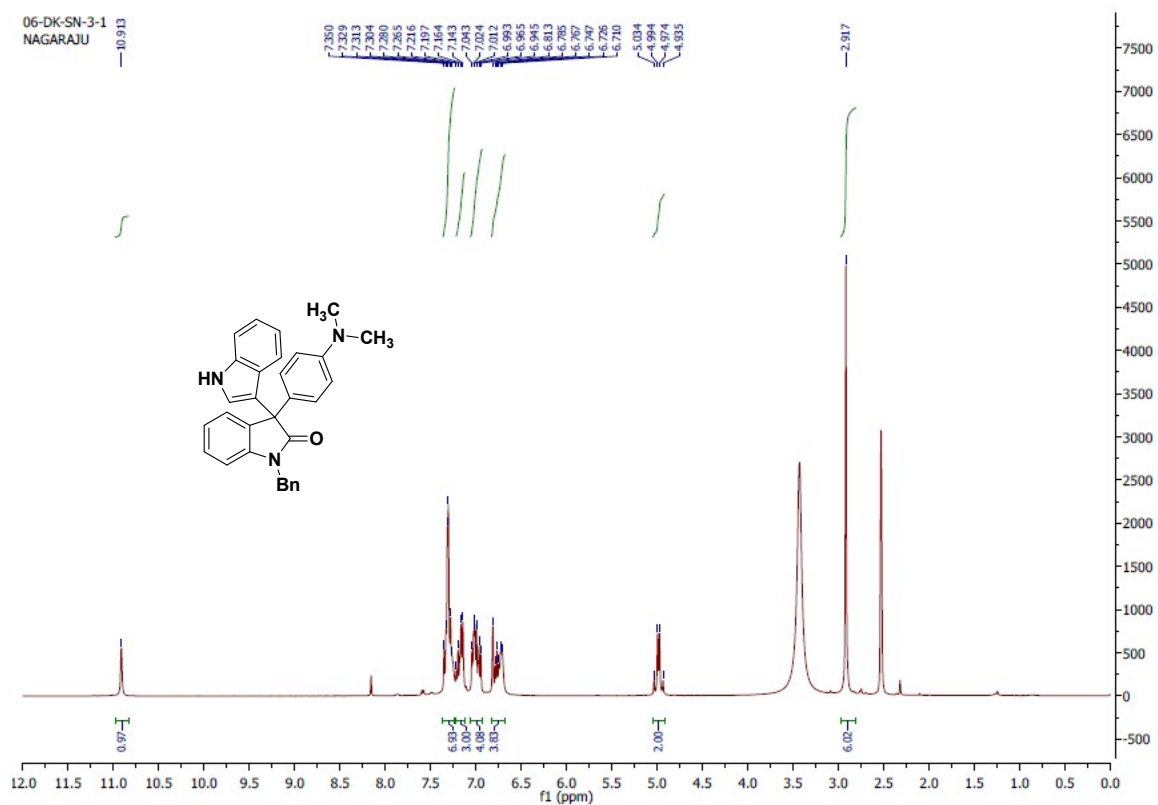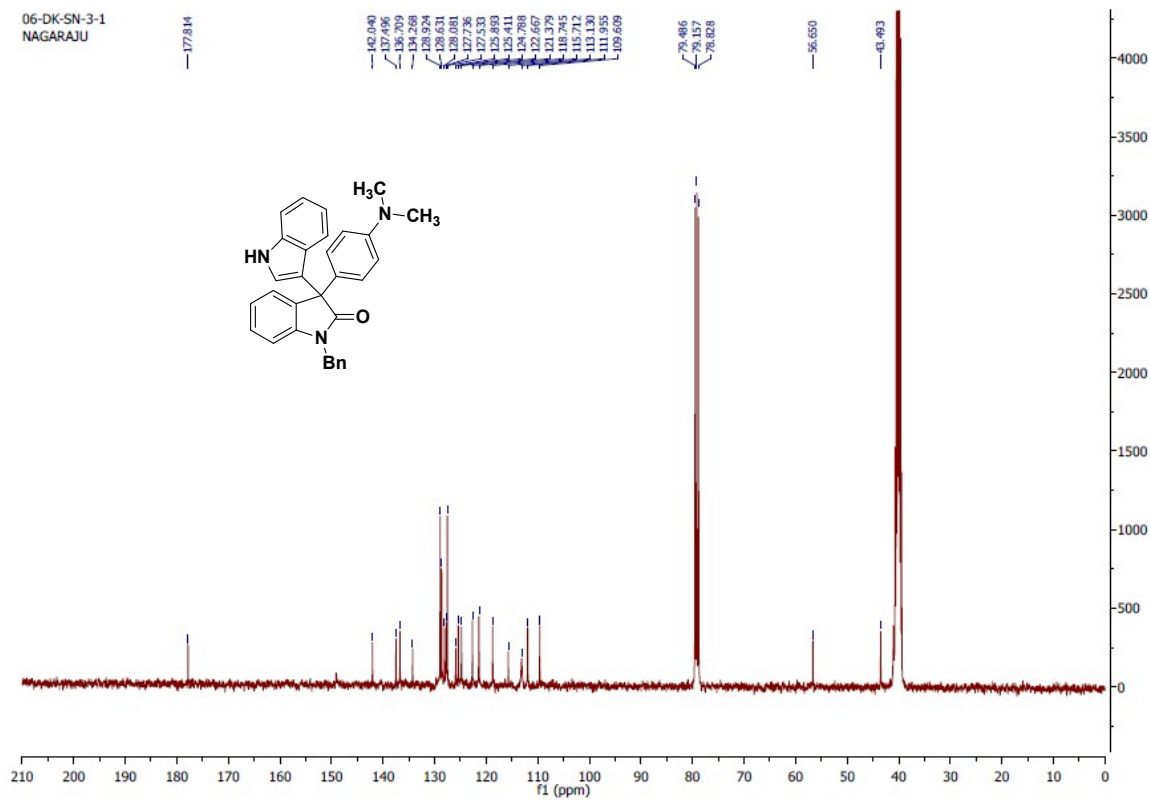



**1-allyl-5-chloro-3-(4-(dimethylamino)phenyl)-3-(1H-indol-3-yl)indolin-2-one (21c):**

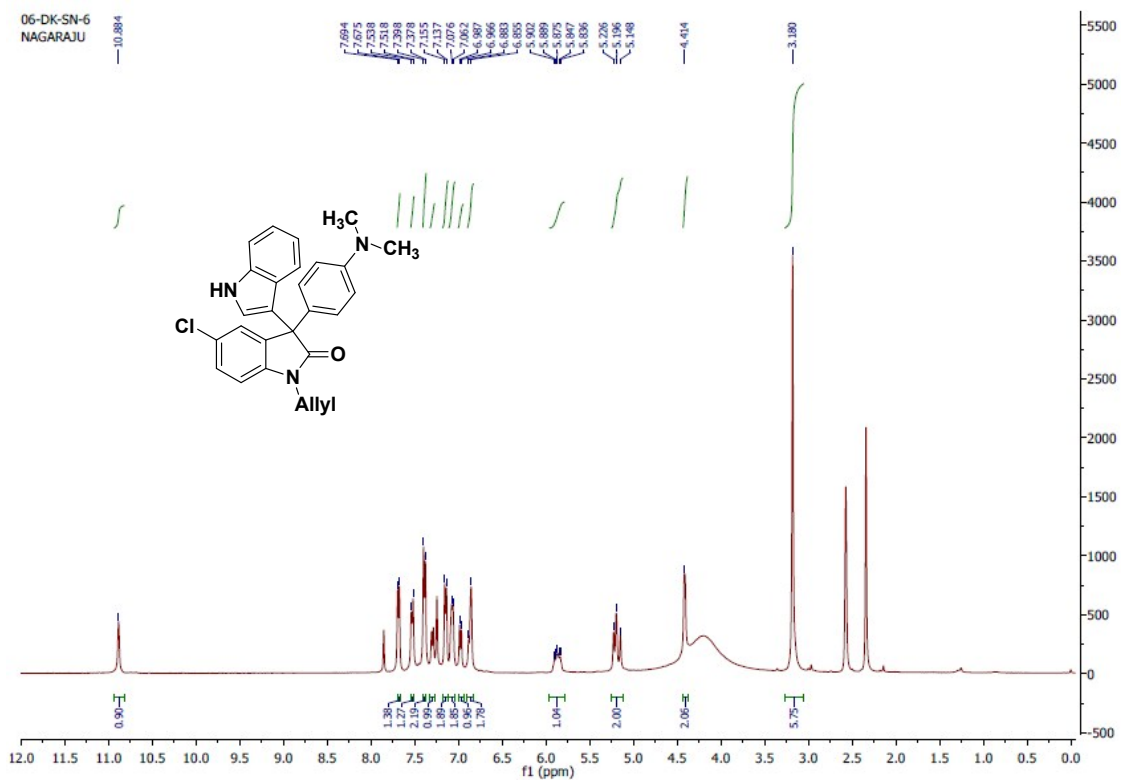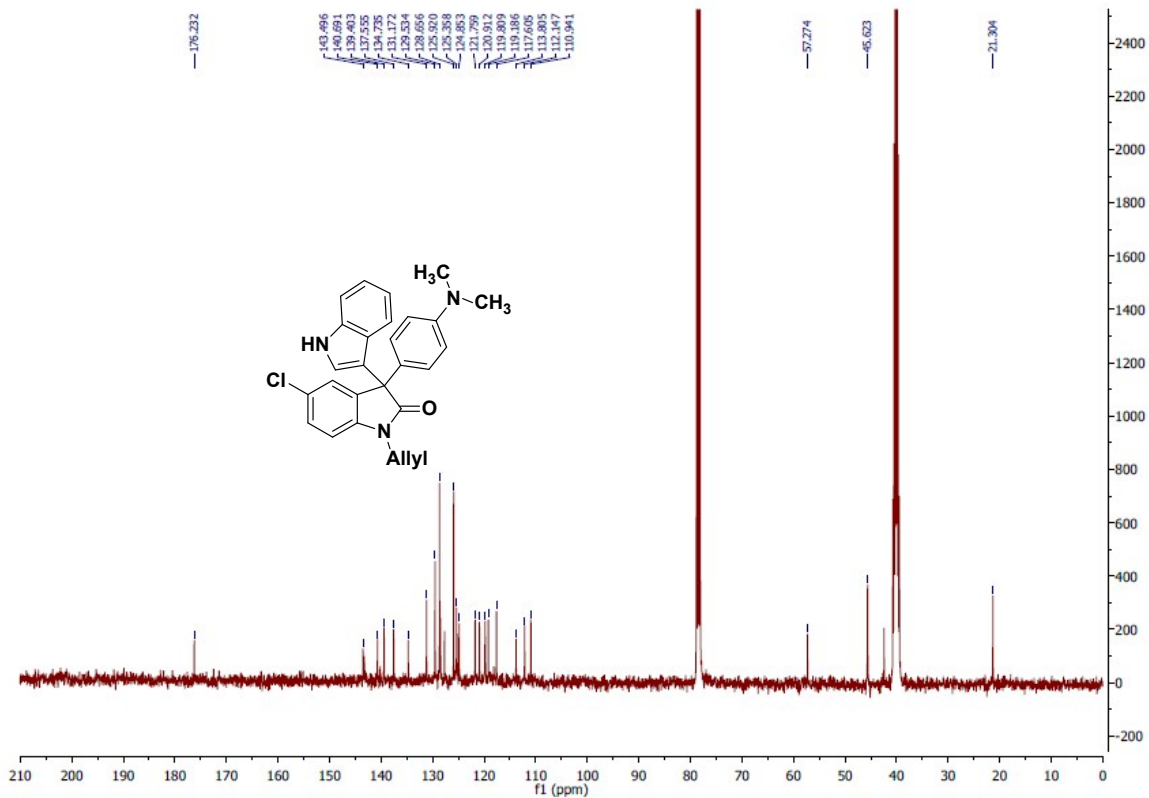

**1-allyl-3-(1H-indol-3-yl)-3-(4-(methylamino)phenyl)indolin-2-one (21d):**

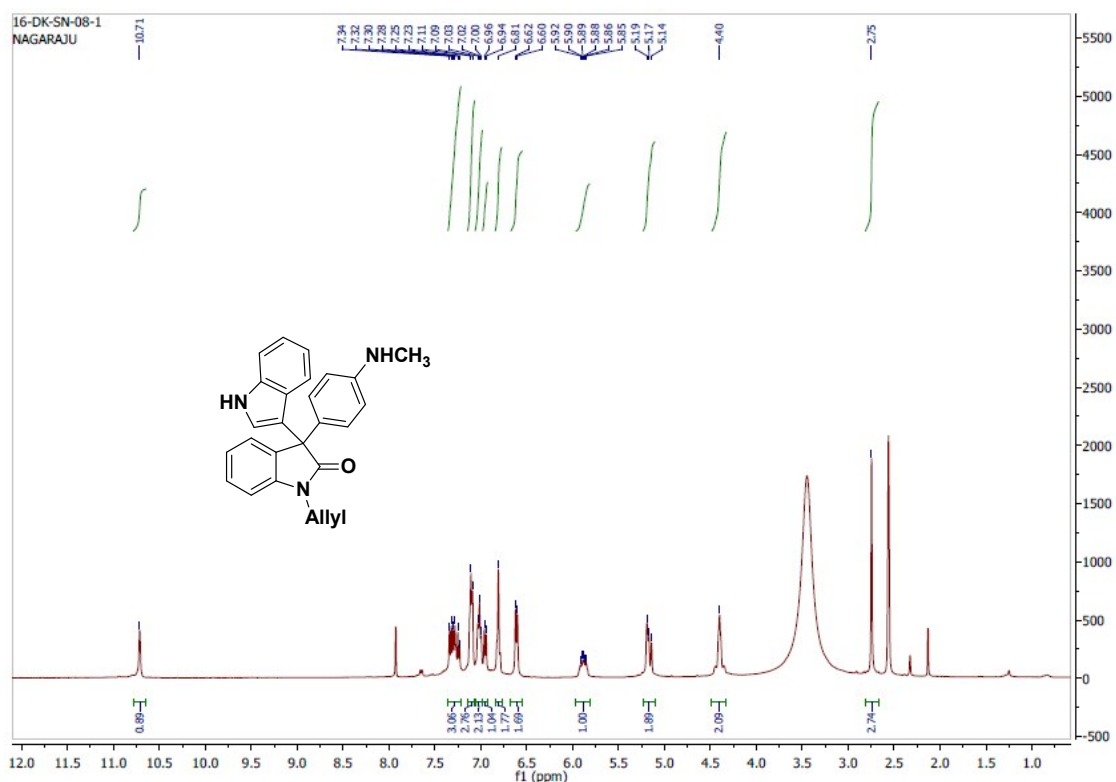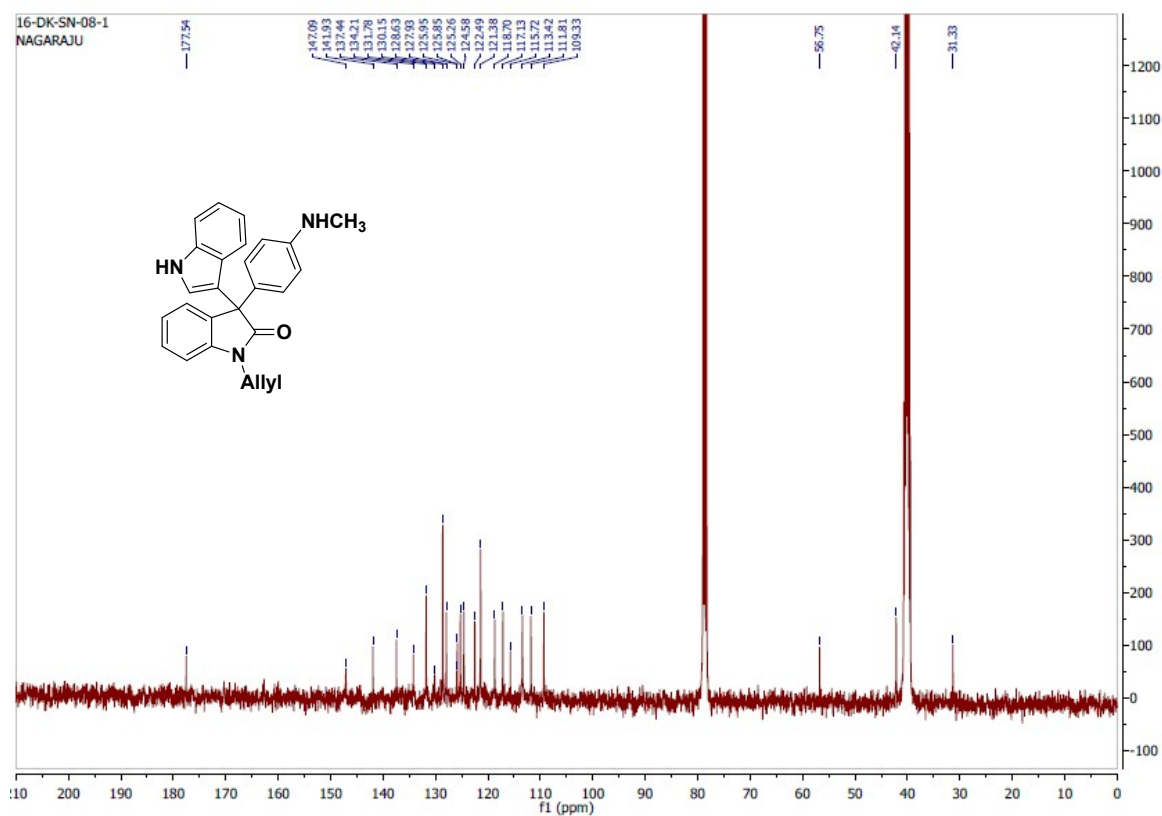

**2-(1-benzyl-3-hydroxy-2-oxindolin-3-yl)acetic acid (24a):**

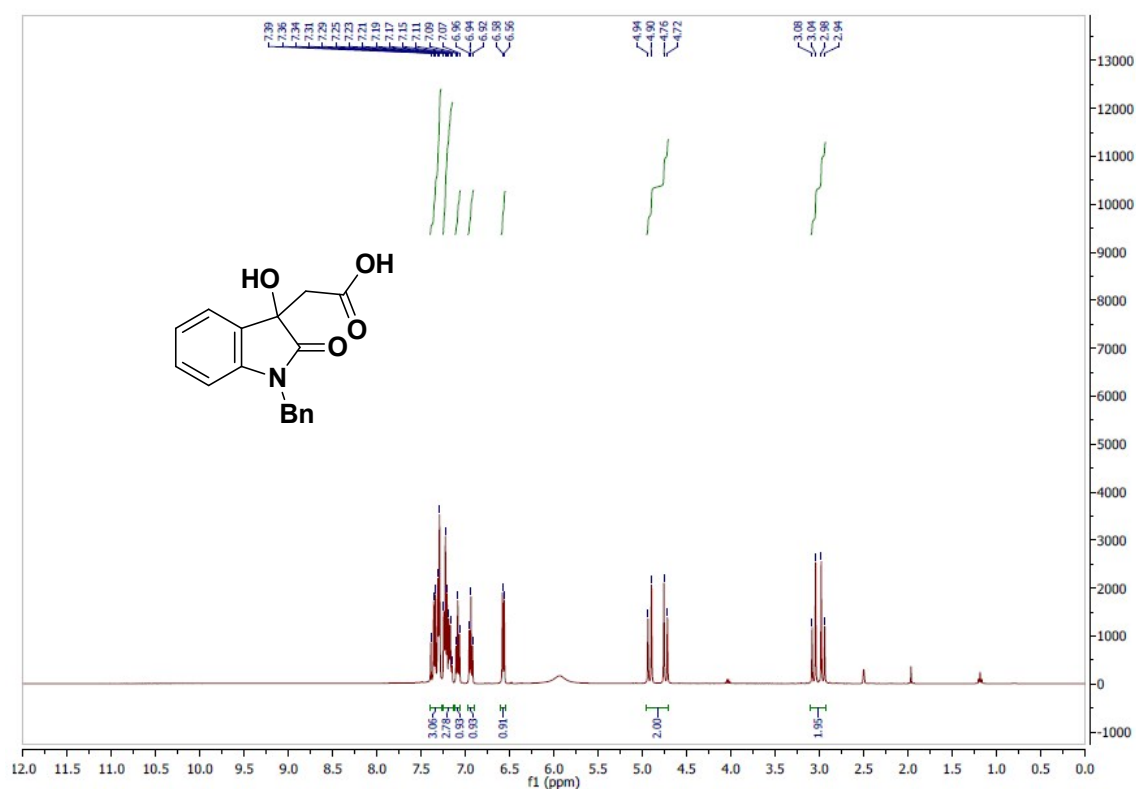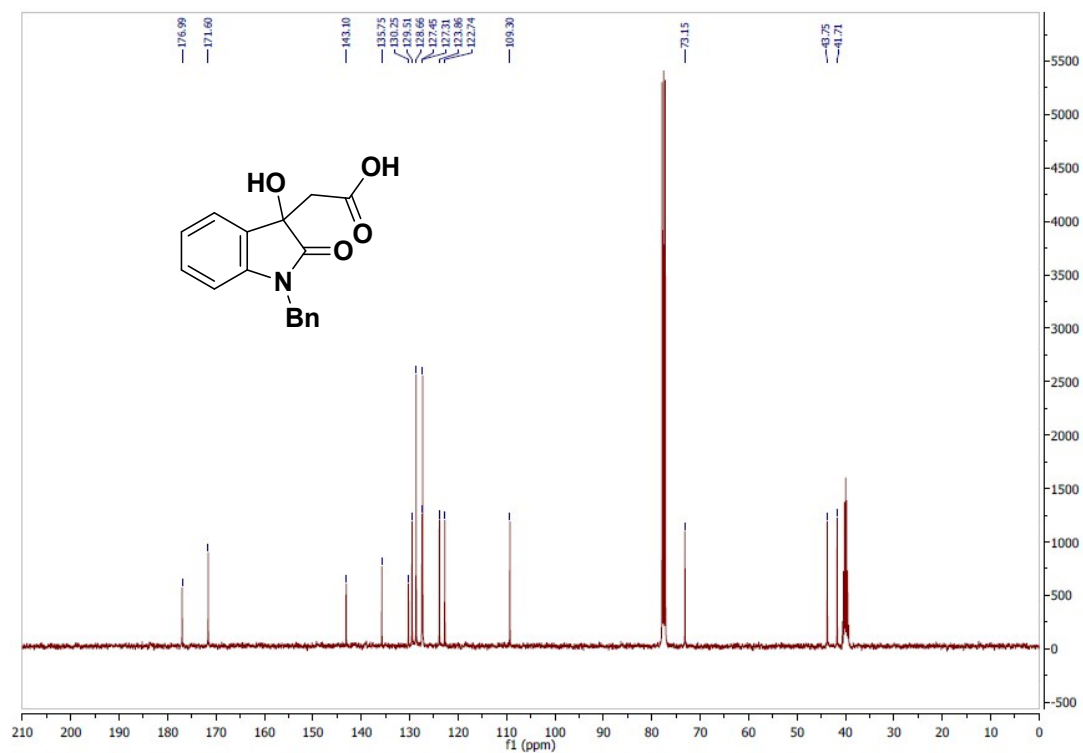

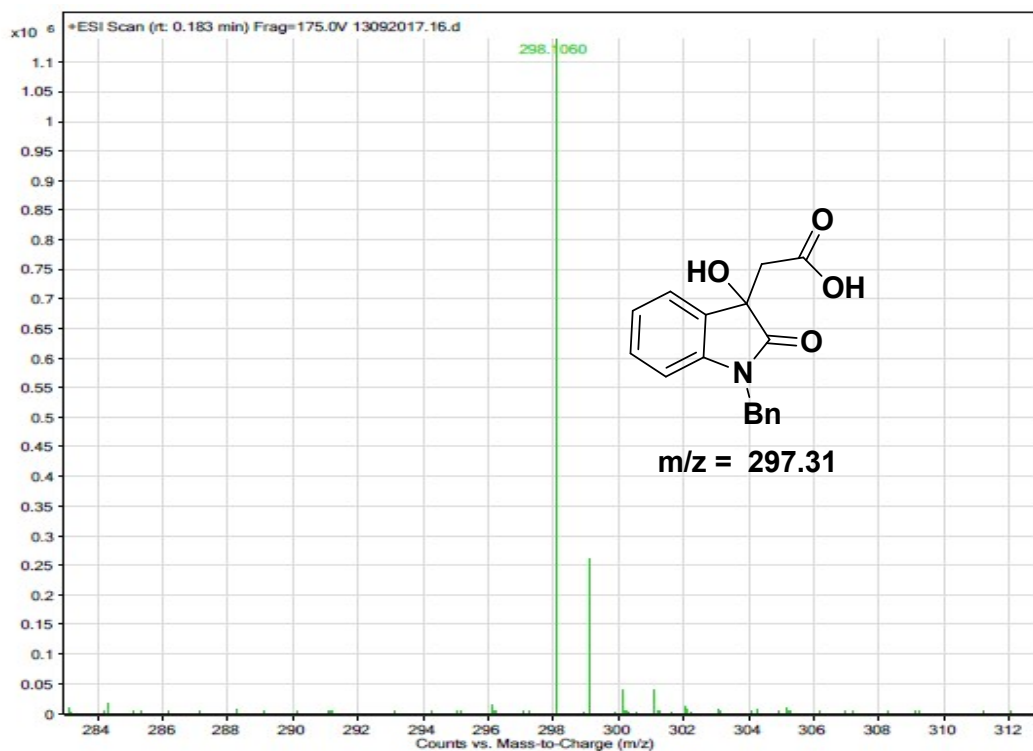

*2-(5-chloro-3-hydroxy-1-methyl-2-oxindolin-3-yl)acetic acid (24b):*

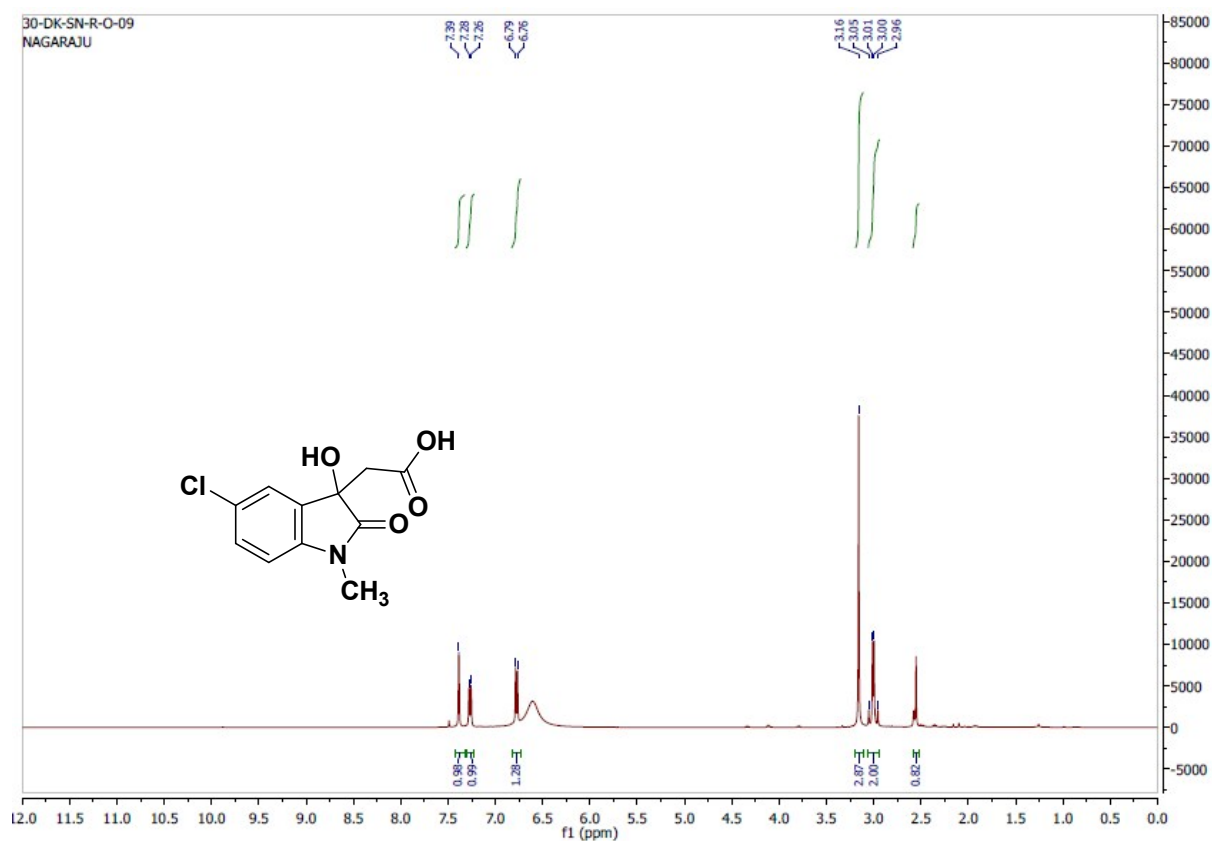

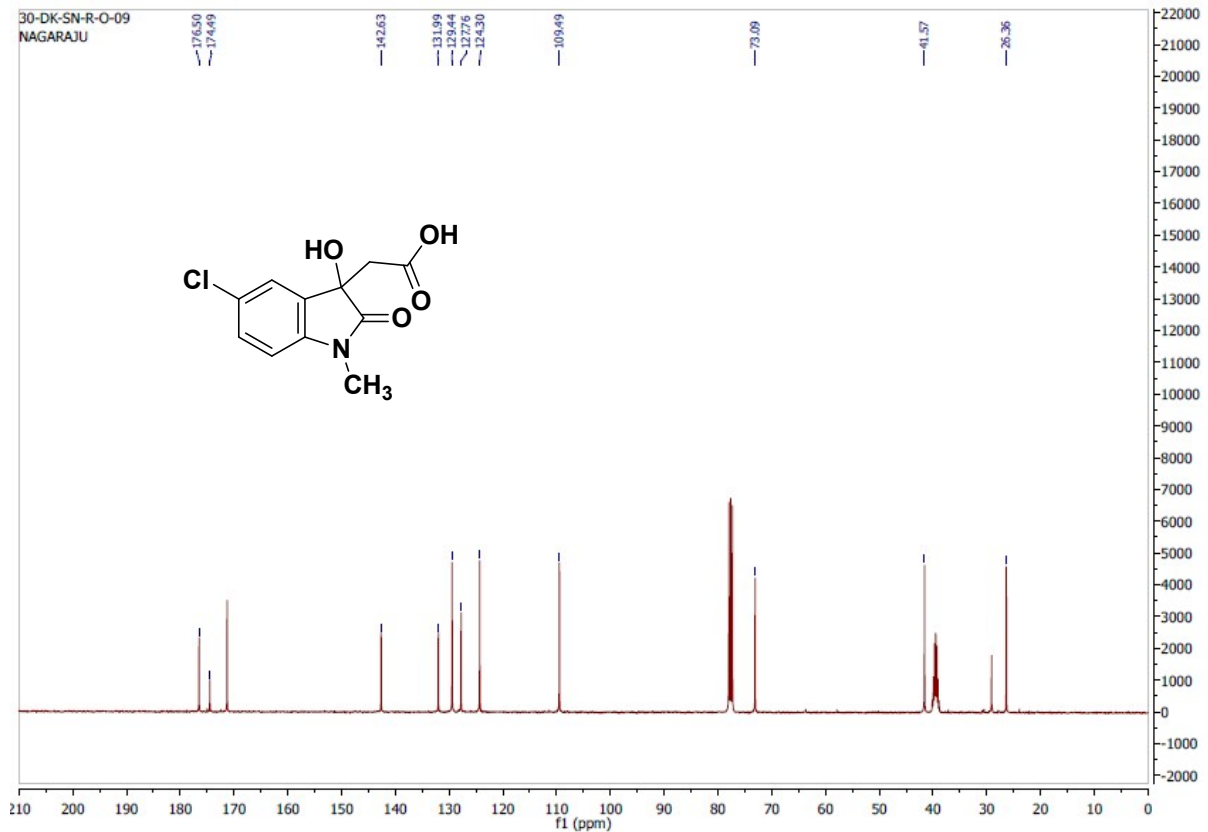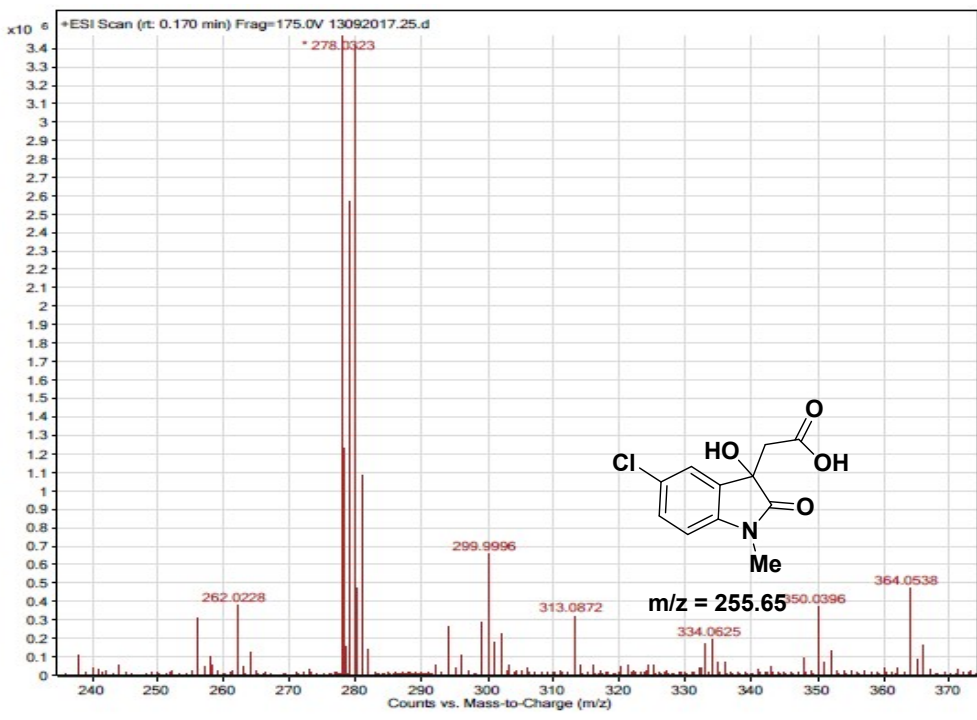

**2-(1-benzyl-5-chloro-3-hydroxy-2-oxindolin-3-yl)acetic acid (24c):**

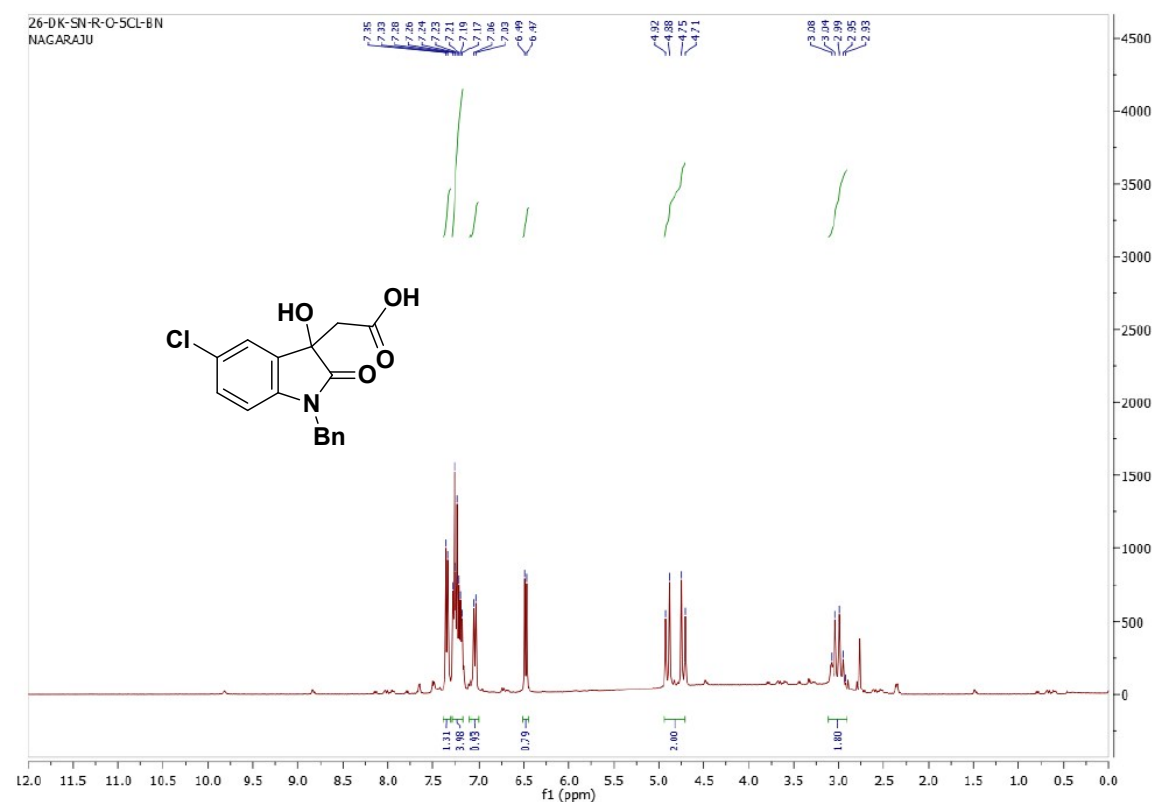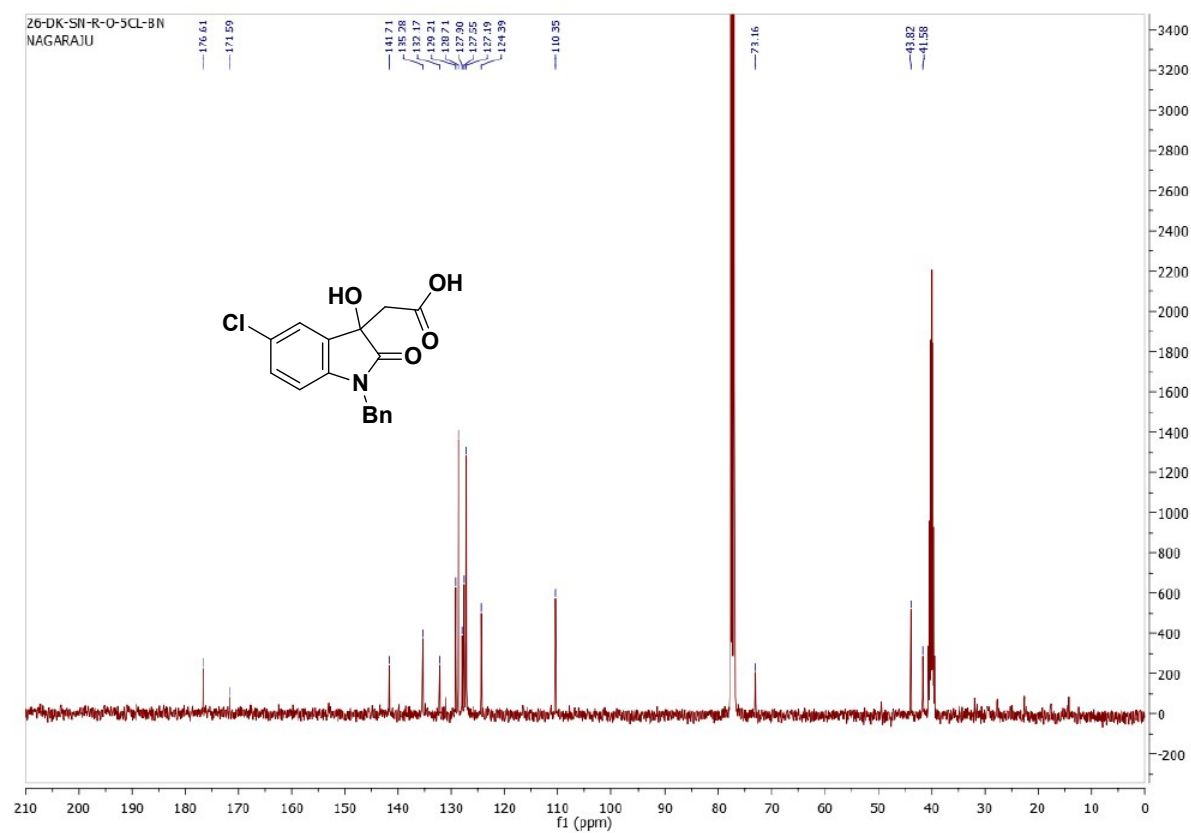

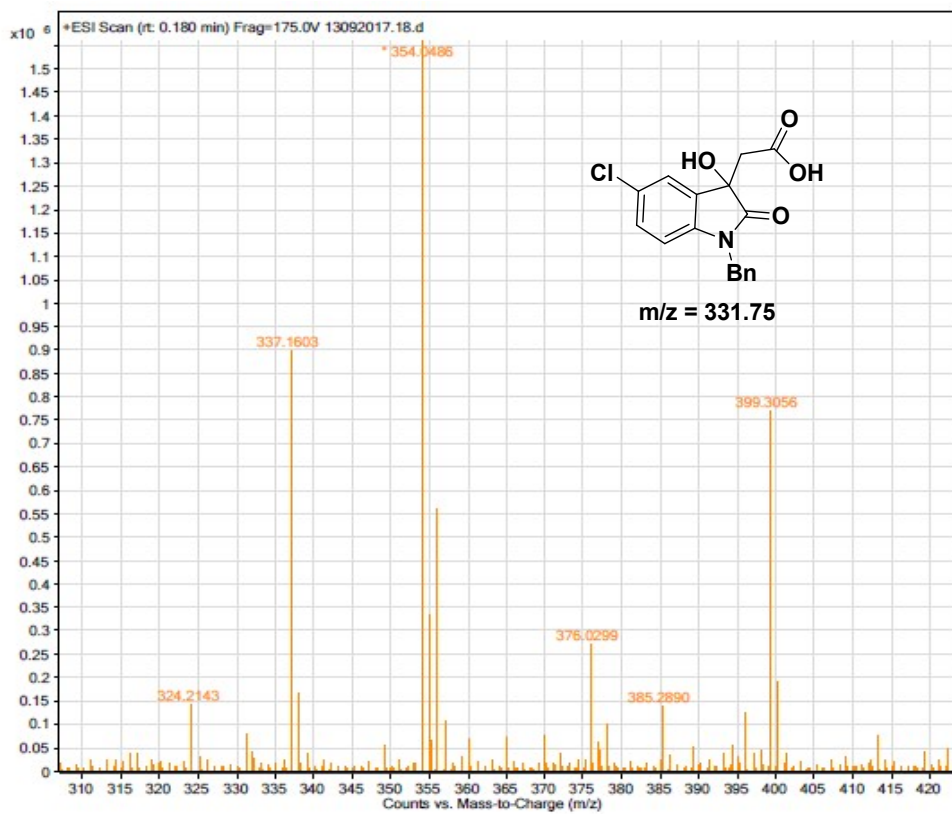

*2-(5-bromo-3-hydroxy-1-methyl-2-oxindolin-3-yl)acetic acid (24d):*

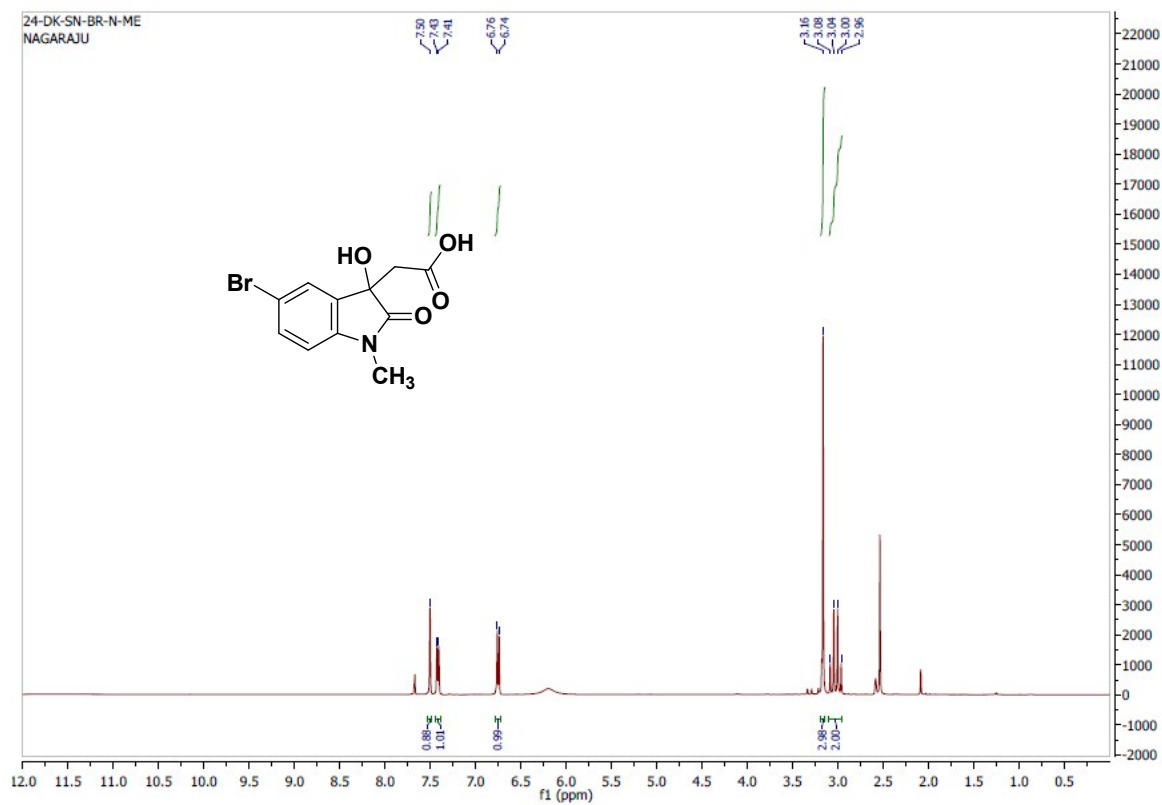

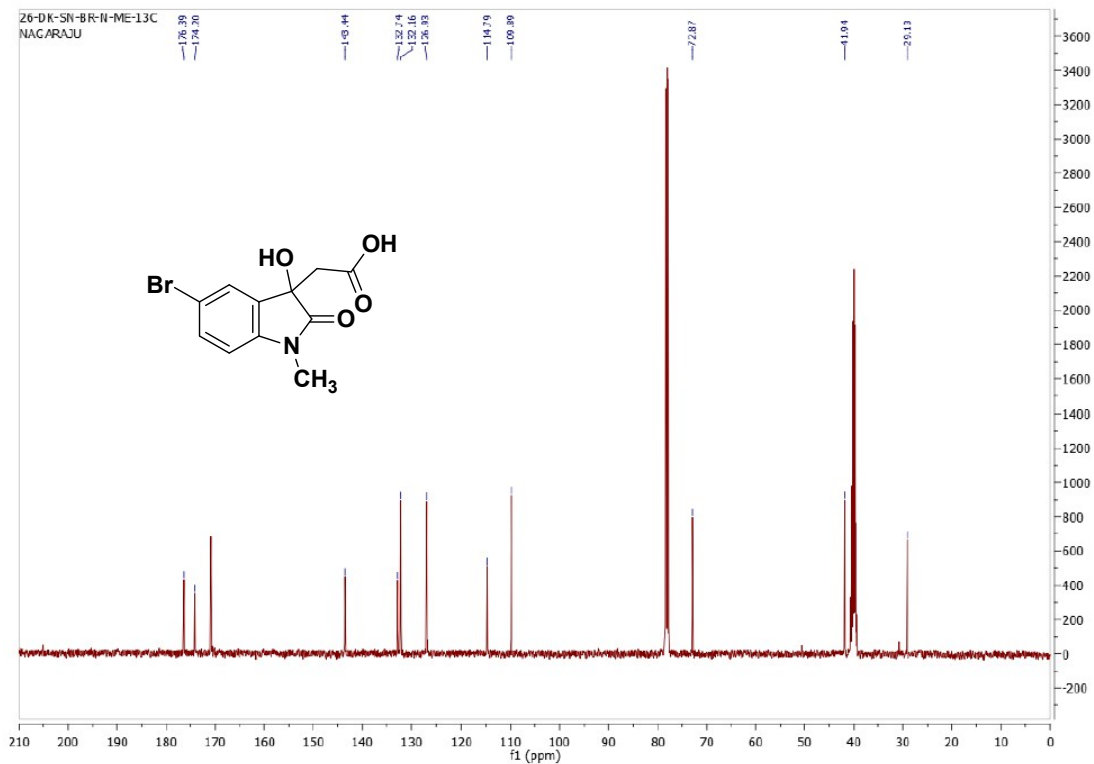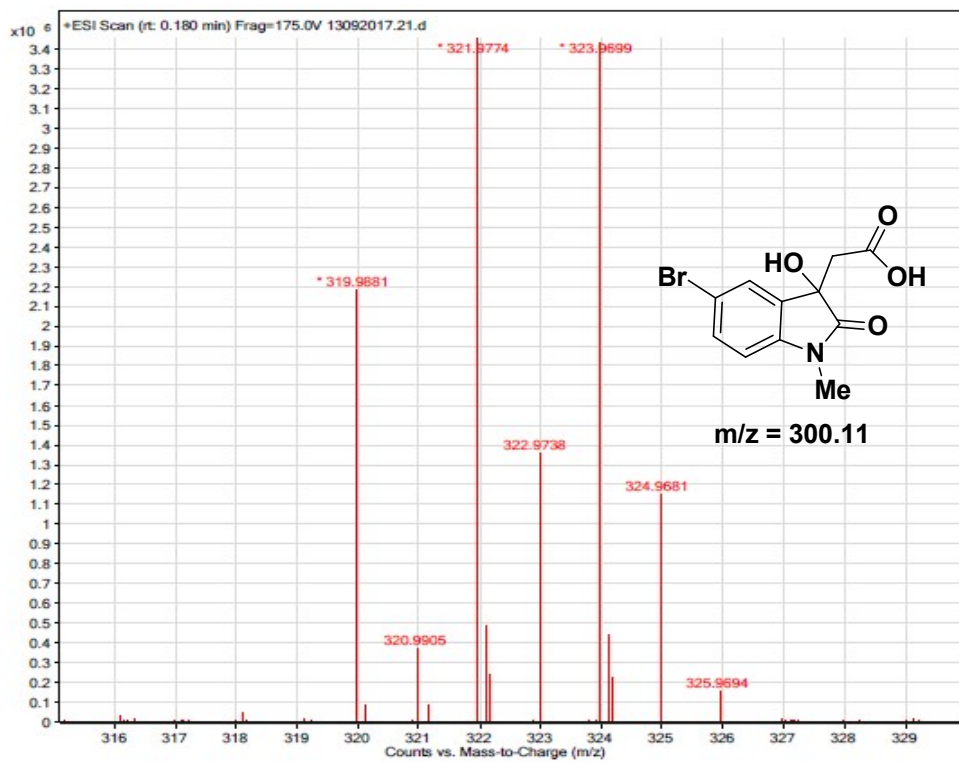



**2-(1-benzyl-5-bromo-3-hydroxy-2-oxindolin-3-yl)acetic acid (24e):**

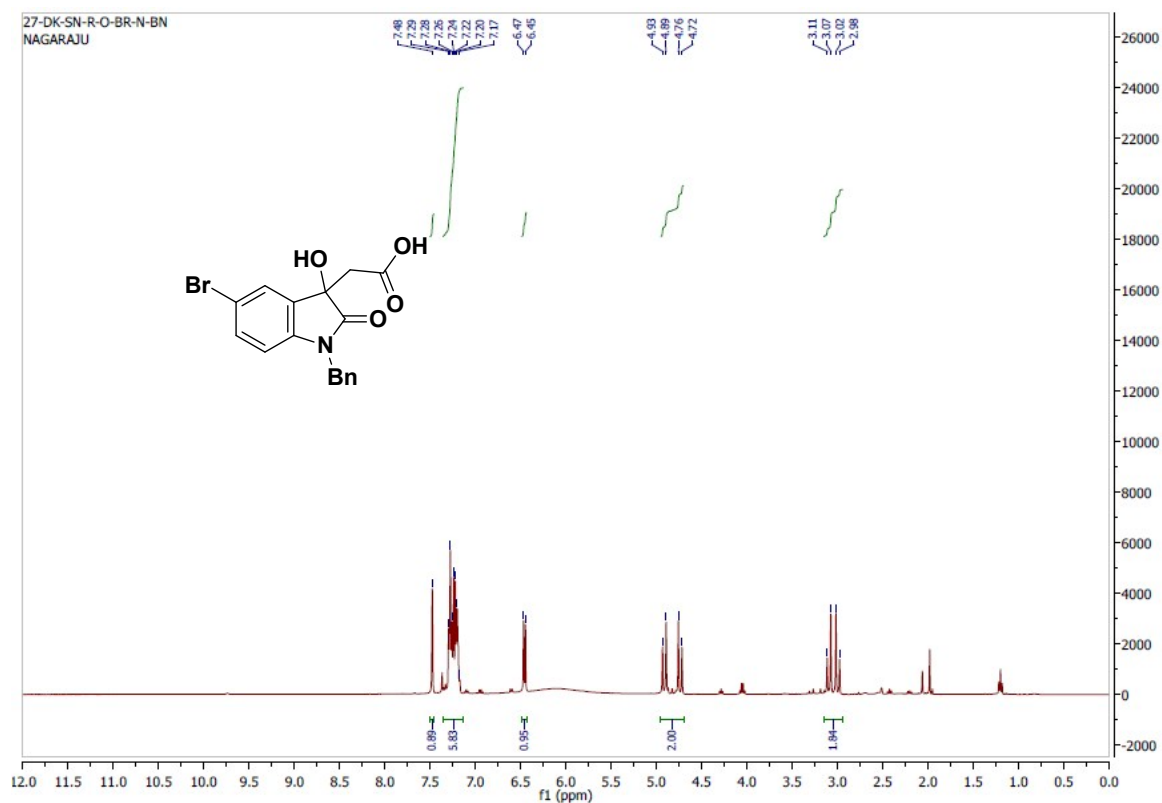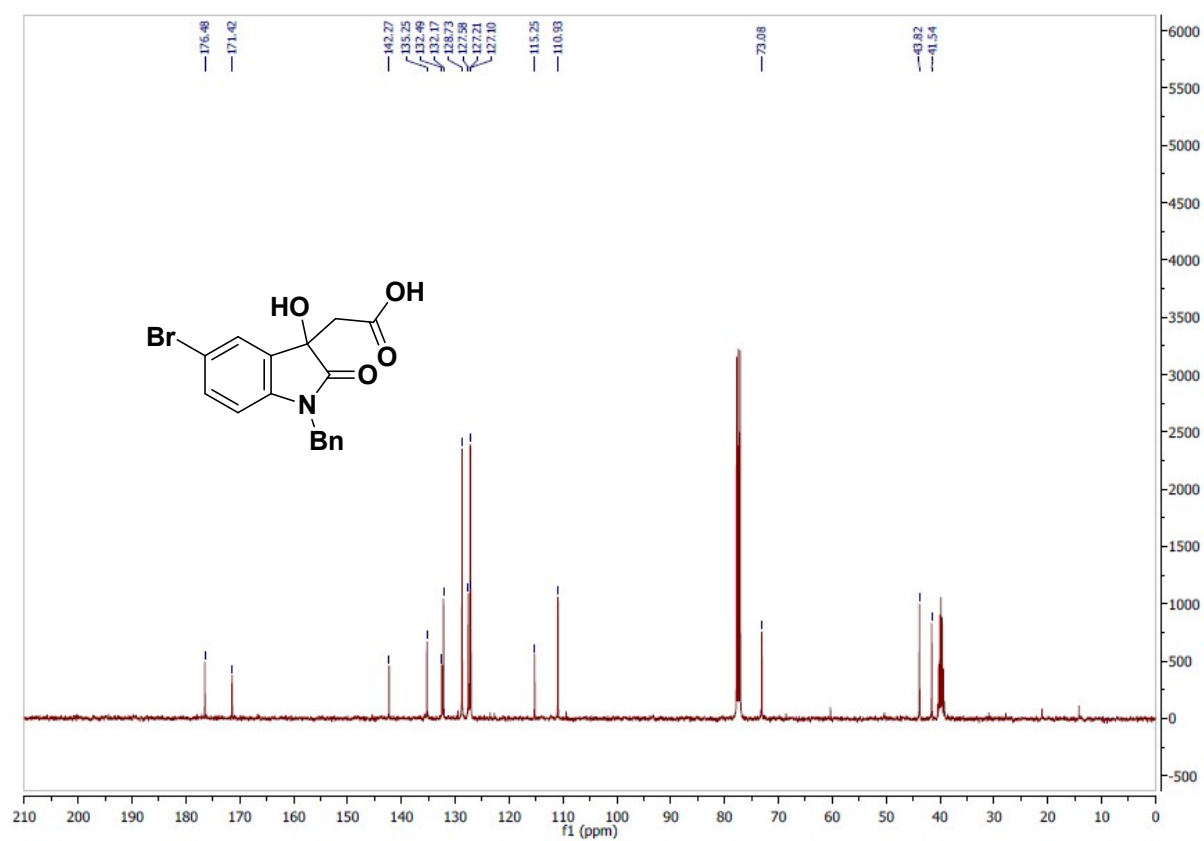

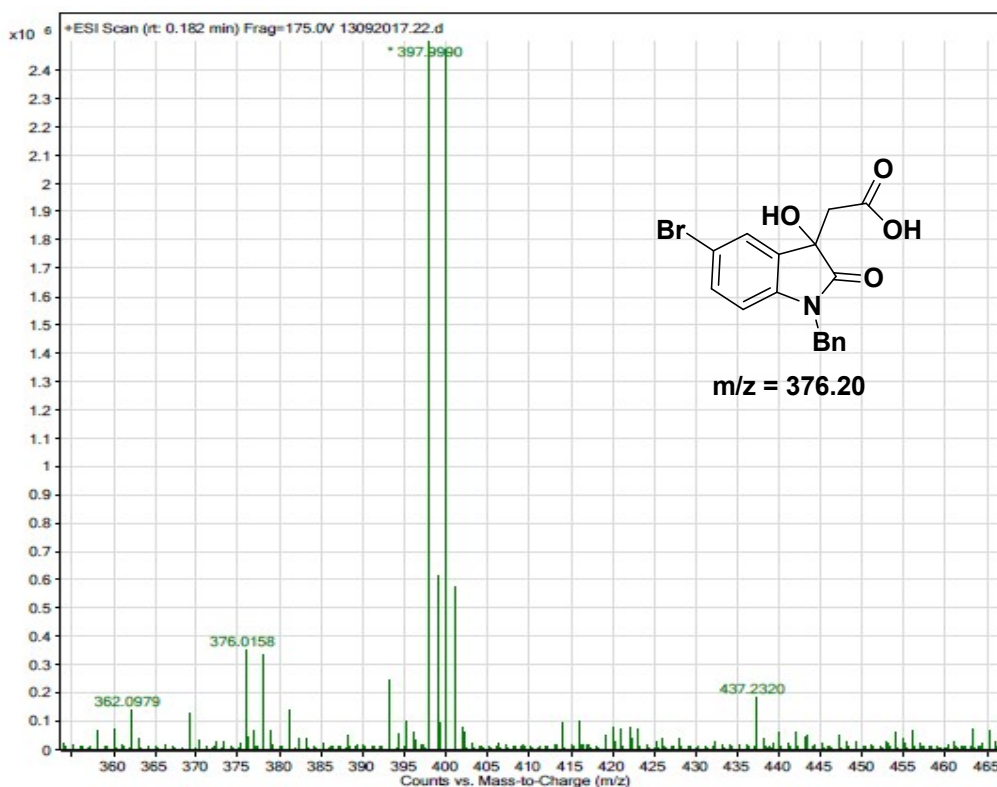

**2-(1-(2-ethoxy-2-oxoethyl)-3-hydroxy-2-oxoindolin-3-yl)acetic acid (24f):**

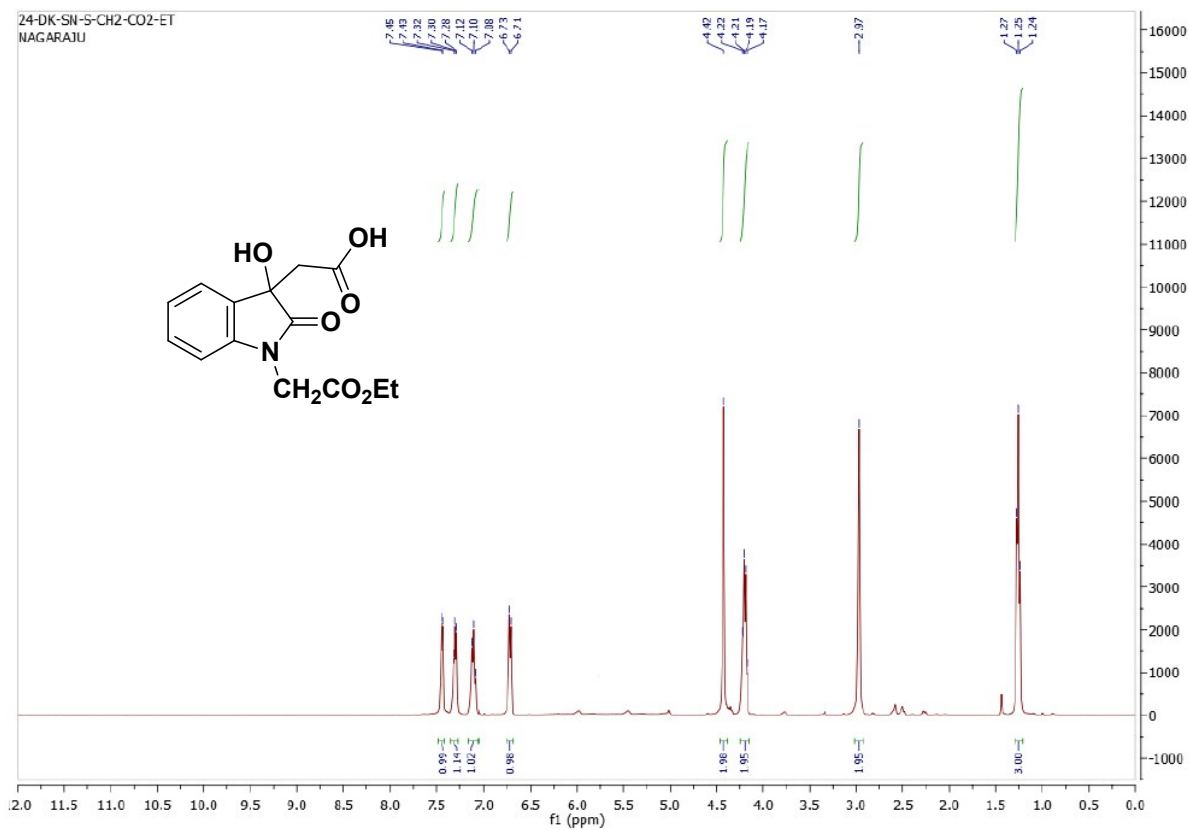

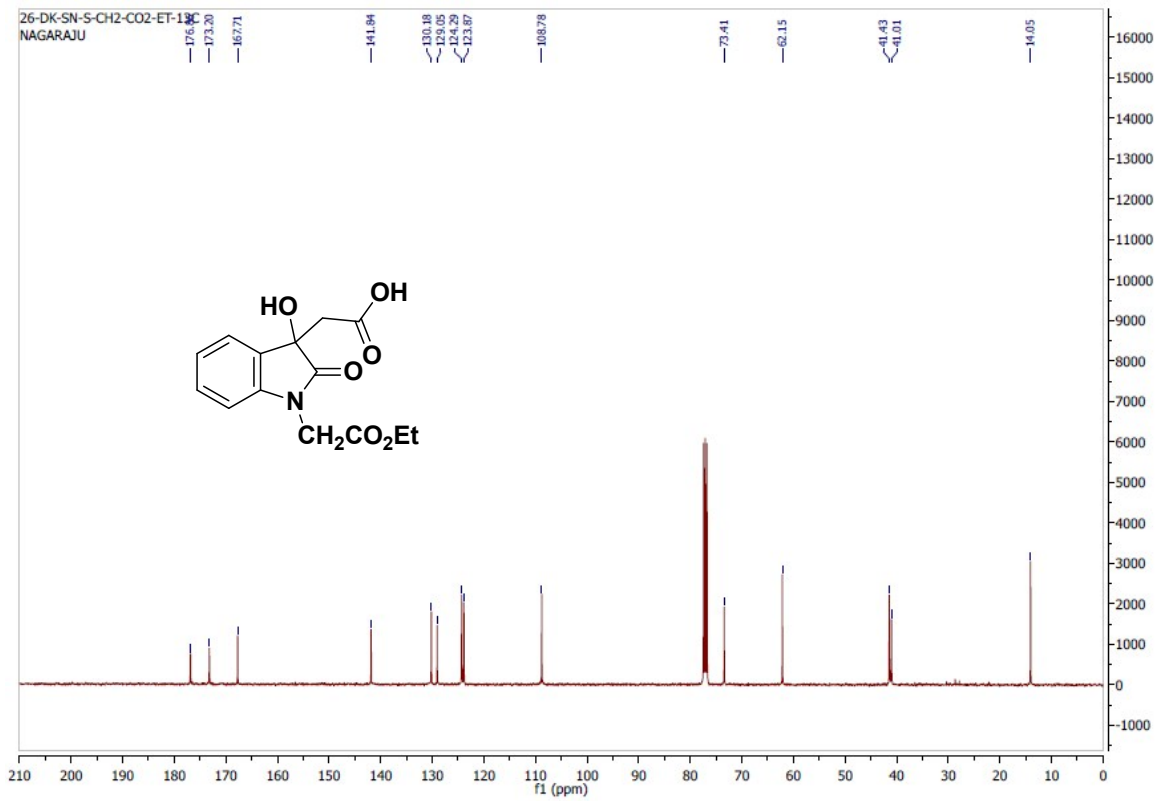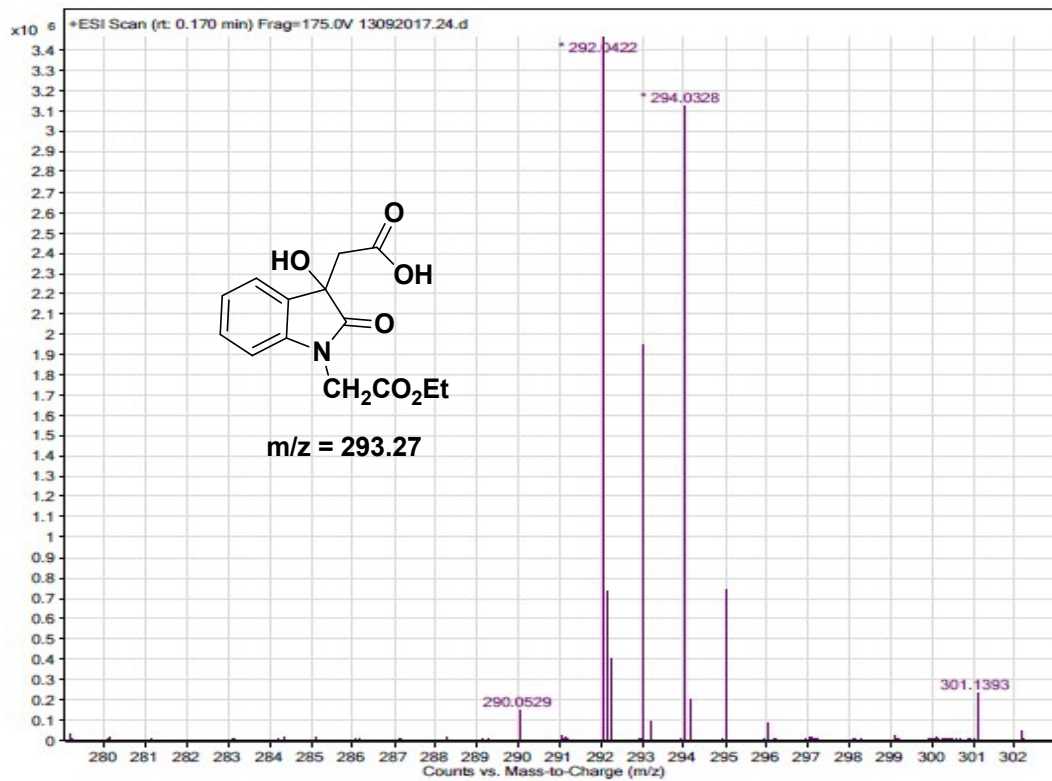

**2-(5-chloro-1-(2-ethoxy-2-oxoethyl)-3-hydroxy-2-oxindolin-3-yl)acetic acid (24g):**

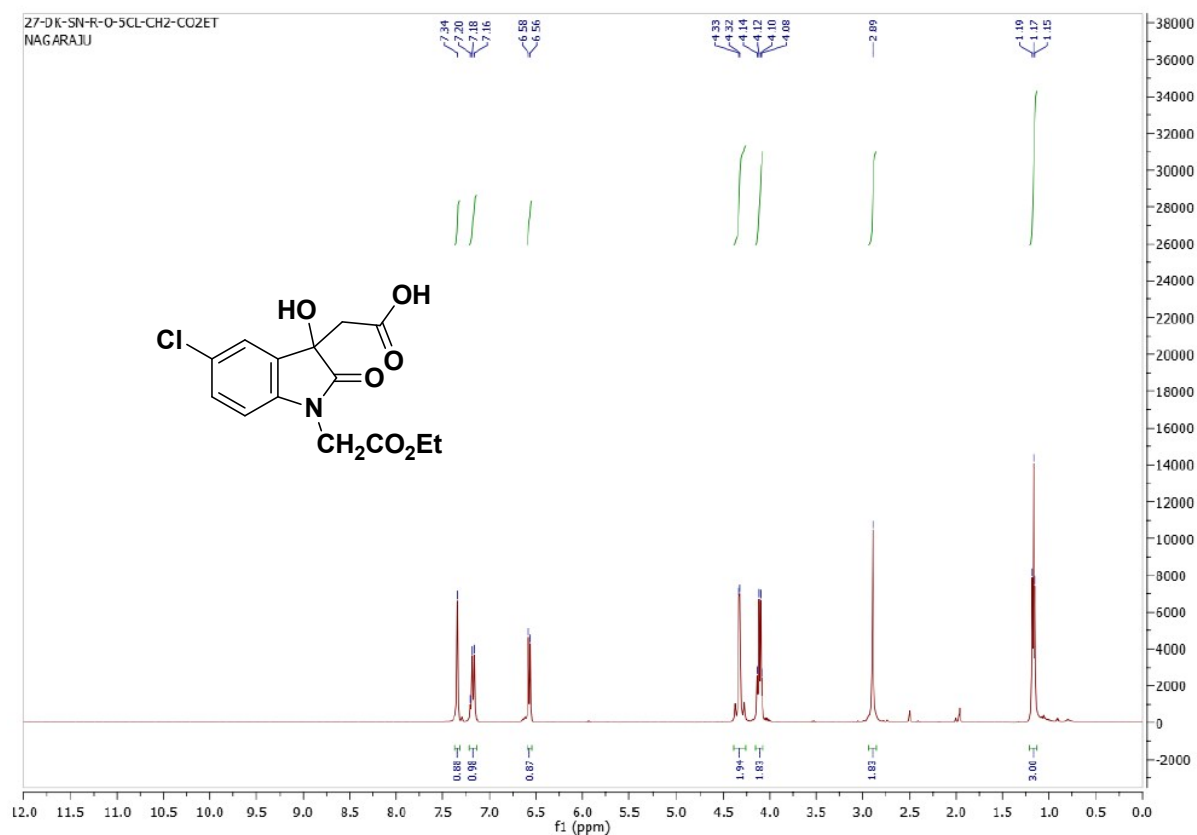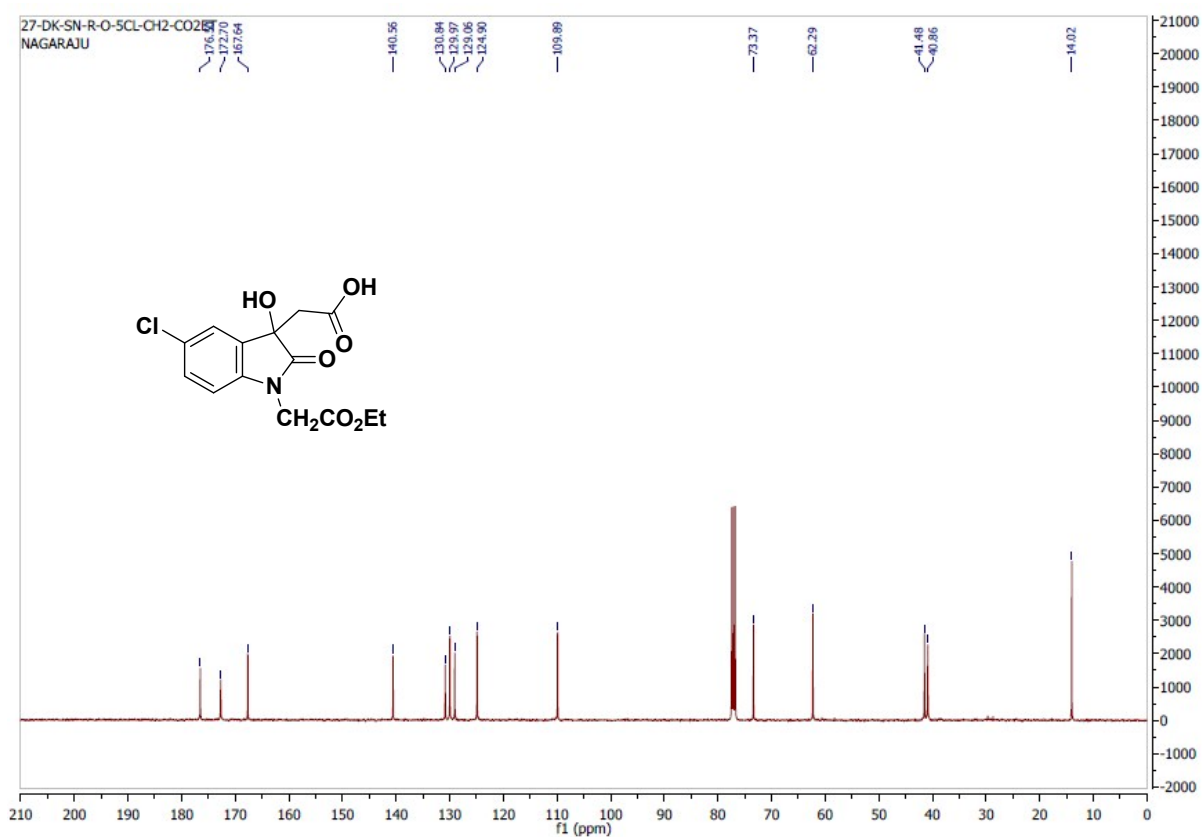

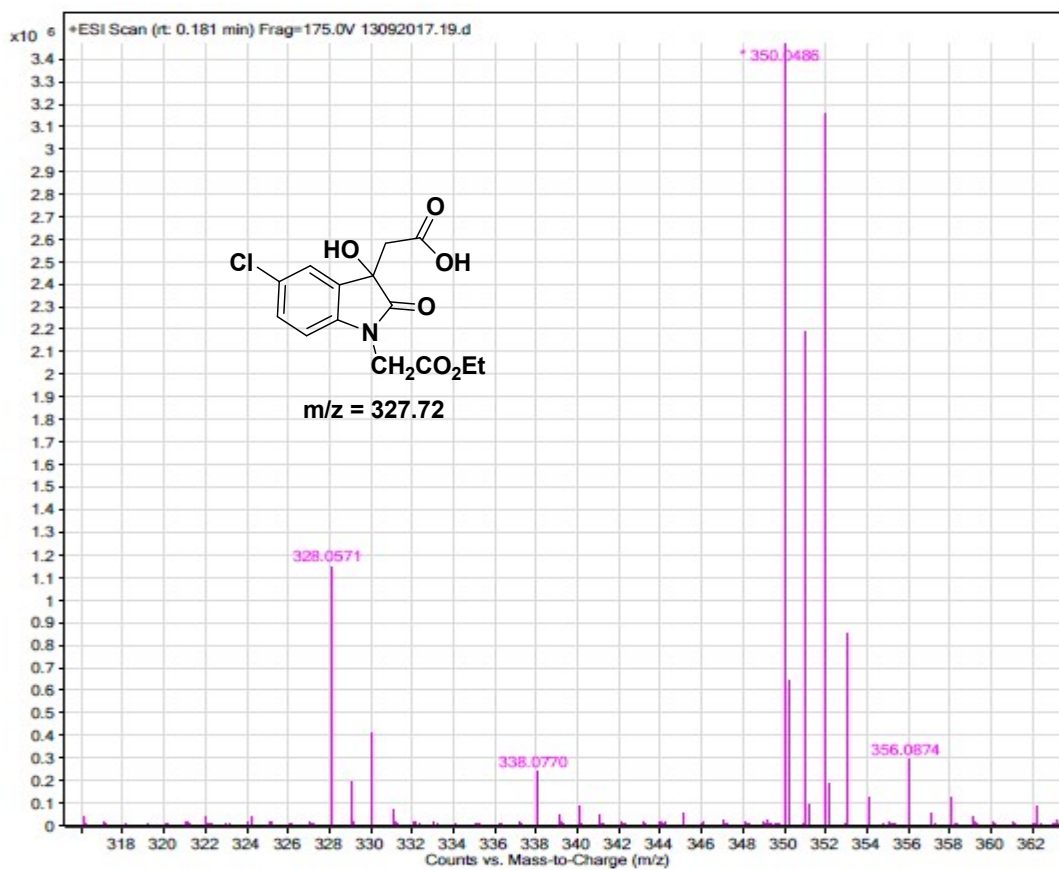

**2-(1-(2-ethoxy-2-oxoethyl)-5-fluoro-3-hydroxy-2-oxoindolin-3-yl)acetic acid (24h):**

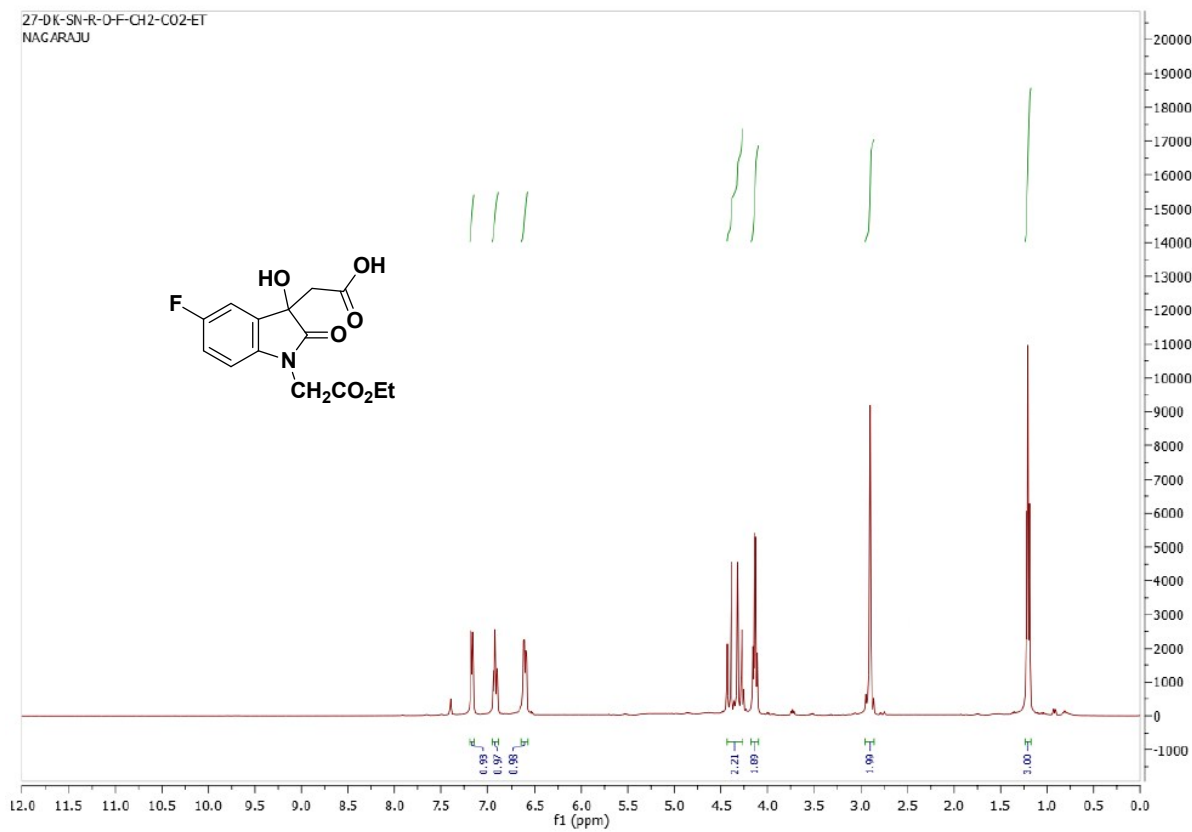

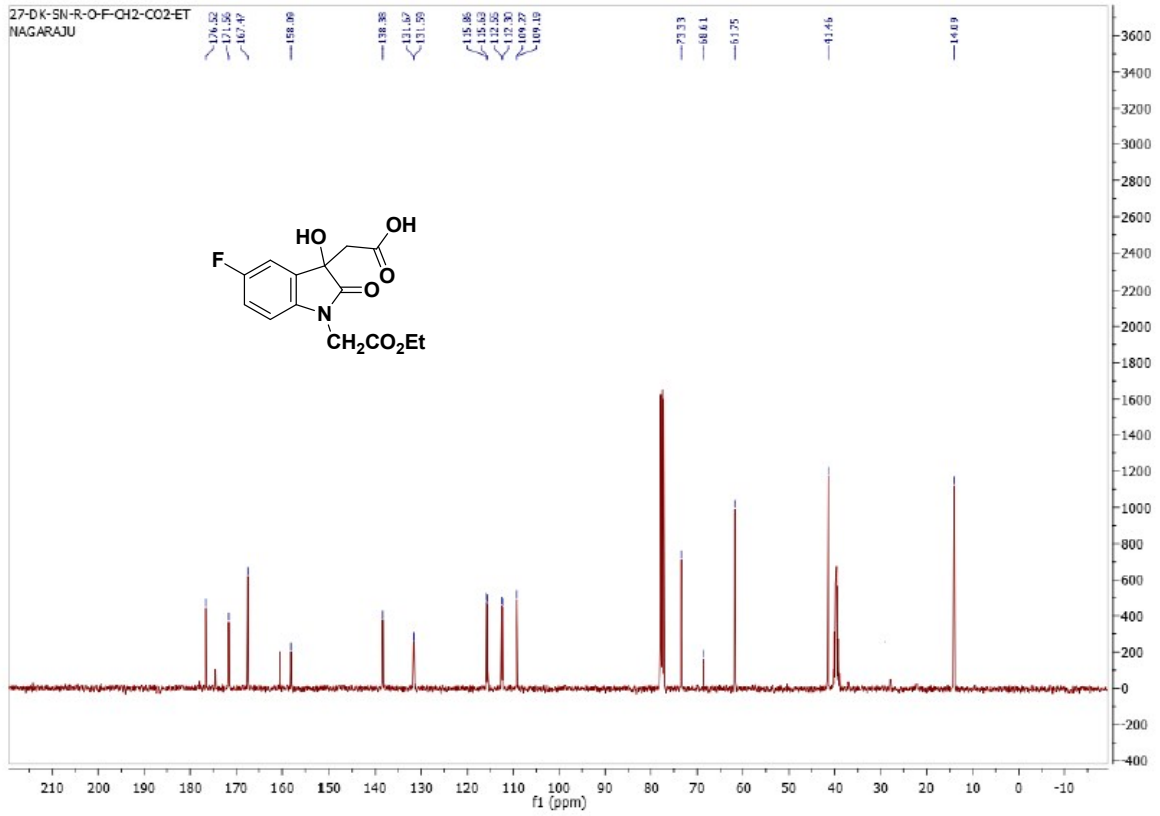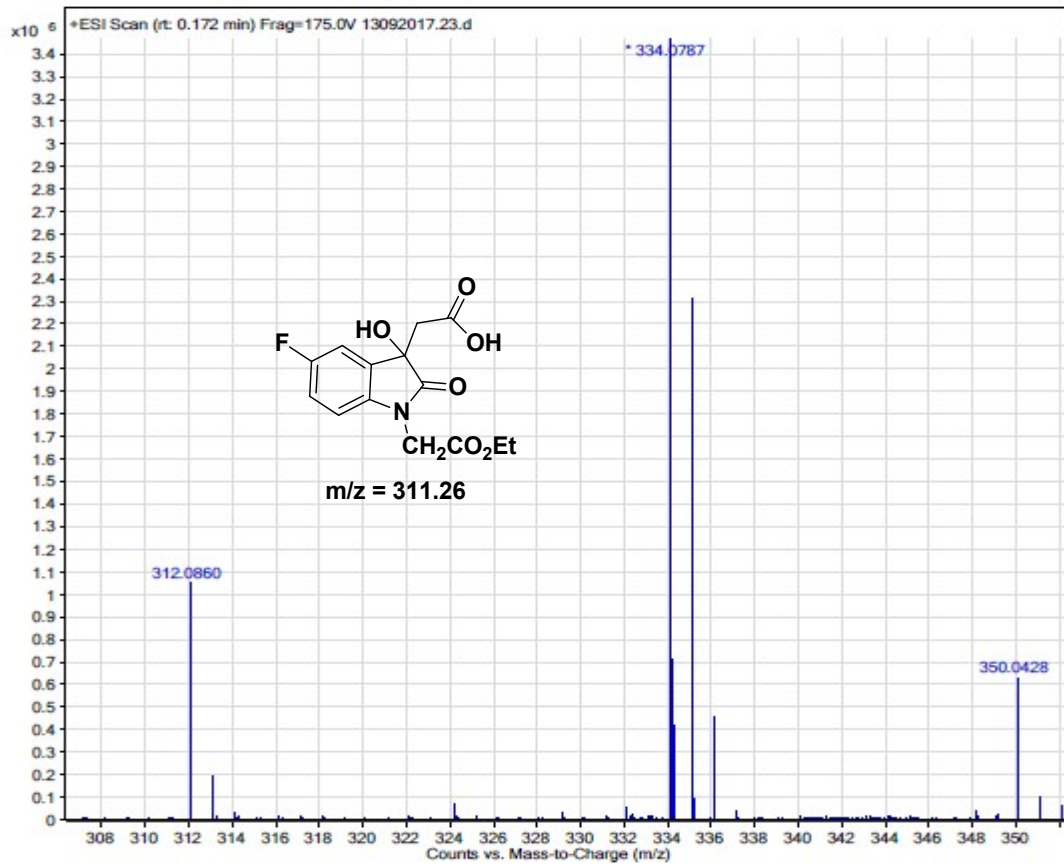

Supplement: c9nj03209f1.pdf [file c9nj03209f1.pdf]
